# Supplementary material for: Comprehensive Evaluation of Parameters Affecting One-Step Method for Quantitative Analysis of Fatty Acids in Meat
Source: PubMed Central journal article supplement (PMC6780067; doi:10.3390/metabo9090189), 2019-09-18
Supplement: metabolites-09-00189-s001.pdf [file metabolites-09-00189-s001.pdf]

Supplementary material

Table S1. Fatty acids peak area normalised by the volume (toluene) and sample weight (TP = temperature; TM=time; CO= acid concentration; VT= volume toluene; VA = volume acid; M= sample weight; H=moisture; C11= area of the internal standard not normalised; C11N=area of the internal standard normalised by the volume of toluene).

| #  | TP | TM | CO | VT | VA | M   | H   | C11:0  | C11 N   | total    | unreported | C10:0 | C12:0  | C14:0   | iso C15 | anteiso C15 |
|----|----|----|----|----|----|-----|-----|--------|---------|----------|------------|-------|--------|---------|---------|-------------|
| 1  | 60 | 1  | 5  | 4  | 4  | 100 | 0   | 205042 | 820168  | 34354049 | 1633289    | 53040 | 125760 | 851520  | 0       | 0           |
| 2  | 60 | 3  | 5  | 4  | 4  | 100 | 0   | 246406 | 985624  | 42311303 | 2085402    | 65426 | 138812 | 1056000 | 0       | 55446       |
| 3  | 60 | 1  | 3  | 3  | 3  | 200 | 2.5 | 163332 | 489996  | 24036141 | 1752574    | 38134 | 106701 | 570209  | 0       | 29806       |
| 4  | 60 | 1  | 7  | 5  | 5  | 200 | 2.5 | 163473 | 817365  | 37035381 | 2181386    | 52770 | 120074 | 895711  | 0       | 49044       |
| 5  | 60 | 2  | 3  | 5  | 5  | 200 | 2.5 | 171032 | 855160  | 37686606 | 2086581    | 53596 | 121355 | 913695  | 0       | 46281       |
| 6  | 60 | 3  | 3  | 3  | 3  | 200 | 2.5 | 280612 | 841836  | 38254635 | 2223113    | 56093 | 124624 | 929005  | 39761   | 57322       |
| 7  | 60 | 3  | 7  | 5  | 5  | 200 | 2.5 | 207527 | 1037635 | 47178606 | 2552881    | 63875 | 138825 | 1149625 | 38125   | 60850       |
| 8  | 60 | 1  | 3  | 5  | 5  | 200 | 5   | 116827 | 584135  | 27227194 | 1681585    | 43268 | 103293 | 641268  | 0       | 42439       |
| 9  | 60 | 1  | 7  | 3  | 3  | 200 | 5   | 246202 | 738606  | 30809549 | 2005905    | 46302 | 116605 | 723512  | 28244   | 41341       |
| 10 | 60 | 2  | 7  | 5  | 5  | 200 | 5   | 196960 | 984800  | 42314747 | 2237011    | 60796 | 125448 | 1031741 | 33383   | 53756       |
| 11 | 60 | 3  | 3  | 5  | 5  | 200 | 5   | 187562 | 937810  | 42193902 | 2398975    | 62230 | 132819 | 1040417 | 39485   | 48578       |
| 12 | 60 | 3  | 7  | 3  | 3  | 200 | 5   | 335300 | 1005900 | 43874344 | 2588329    | 59839 | 133990 | 1074234 | 37595   | 52946       |
| 13 | 60 | 1  | 5  | 4  | 4  | 300 | 7.5 | 148450 | 593800  | 28000532 | 1963515    | 39652 | 102849 | 640548  | 20254   | 35037       |
| 14 | 60 | 2  | 5  | 4  | 4  | 300 | 7.5 | 213321 | 853284  | 38775869 | 2355354    | 53677 | 121017 | 933835  | 29690   | 46693       |
| 15 | 60 | 3  | 5  | 4  | 4  | 300 | 7.5 | 234867 | 939468  | 44397578 | 2749551    | 58592 | 130039 | 1082882 | 38237   | 51250       |

|    |    |   |   |   |   |     |   |        |        |          |         |       |        |         |       |       |
|----|----|---|---|---|---|-----|---|--------|--------|----------|---------|-------|--------|---------|-------|-------|
| 16 | 60 | 1 | 5 | 4 | 4 | 300 | 0 | 172946 | 691784 | 32448902 | 2109154 | 45701 | 114684 | 773223  | 26963 | 40811 |
| 17 | 60 | 1 | 5 | 4 | 4 | 300 | 0 | 164767 | 659068 | 30800207 | 2045820 | 44627 | 106813 | 716907  | 26133 | 37747 |
| 18 | 60 | 1 | 5 | 4 | 4 | 300 | 0 | 163976 | 655904 | 31024203 | 2178716 | 45684 | 109368 | 729908  | 20750 | 35842 |
| 19 | 60 | 1 | 5 | 4 | 4 | 300 | 0 | 171397 | 685588 | 30734898 | 2075139 | 45980 | 107666 | 714381  | 30247 | 40134 |
| 20 | 60 | 1 | 1 | 4 | 4 | 300 | 0 | 94218  | 376872 | 19702021 | 1610734 | 31248 | 91248  | 425769  | 0     | 24977 |
| 21 | 60 | 1 | 9 | 4 | 4 | 300 | 0 | 136382 | 545528 | 23209137 | 1864211 | 31396 | 95933  | 487839  | 0     | 29651 |
| 22 | 60 | 1 | 5 | 2 | 2 | 300 | 0 | 197270 | 394540 | 19980213 | 1679408 | 29685 | 91275  | 424497  | 13685 | 25523 |
| 23 | 60 | 1 | 5 | 6 | 6 | 300 | 0 | 118726 | 712356 | 33502429 | 2099577 | 47644 | 111980 | 798614  | 28040 | 41129 |
| 24 | 60 | 2 | 5 | 4 | 4 | 300 | 0 | 223717 | 894868 | 41629387 | 2555199 | 58215 | 127020 | 1019651 | 34228 | 52537 |
| 25 | 60 | 2 | 5 | 4 | 4 | 300 | 0 | 226937 | 907748 | 42509902 | 2469598 | 57848 | 128119 | 1042416 | 36092 | 56937 |
| 26 | 60 | 2 | 5 | 4 | 4 | 300 | 0 | 227292 | 909168 | 41179763 | 2545861 | 57928 | 126767 | 1000341 | 37836 | 55948 |
| 27 | 60 | 2 | 1 | 4 | 4 | 300 | 0 | 165276 | 661104 | 31250030 | 2033363 | 44797 | 112366 | 736680  | 31948 | 47412 |
| 28 | 60 | 2 | 9 | 4 | 4 | 300 | 0 | 193885 | 775540 | 31699653 | 2158984 | 44603 | 110479 | 733705  | 23489 | 39436 |
| 29 | 60 | 2 | 5 | 6 | 6 | 300 | 0 | 156695 | 940170 | 43630828 | 2557177 | 58401 | 128428 | 1064467 | 33474 | 52164 |
| 30 | 60 | 3 | 5 | 4 | 4 | 300 | 0 | 242484 | 969936 | 46106614 | 2844830 | 62780 | 134177 | 1149521 | 46426 | 61810 |
| 31 | 60 | 3 | 5 | 4 | 4 | 300 | 0 | 242708 | 970832 | 44586759 | 2624519 | 59133 | 131560 | 1099093 | 37507 | 53573 |
| 32 | 60 | 3 | 5 | 4 | 4 | 300 | 0 | 240375 | 961500 | 44442211 | 2662775 | 60148 | 133383 | 1085463 | 40738 | 63262 |
| 33 | 60 | 3 | 5 | 4 | 4 | 300 | 0 | 238536 | 954144 | 45257638 | 2581920 | 60027 | 135007 | 1109960 | 43799 | 64913 |
| 34 | 60 | 3 | 1 | 4 | 4 | 300 | 0 | 198877 | 795508 | 36686441 | 2252282 | 51497 | 117523 | 884596  | 30728 | 43894 |

|    |    |   |   |   |   |     |     |        |        |          |         |       |        |         |       |       |
|----|----|---|---|---|---|-----|-----|--------|--------|----------|---------|-------|--------|---------|-------|-------|
| 35 | 60 | 3 | 9 | 4 | 4 | 300 | 0   | 230923 | 923692 | 39934391 | 2553639 | 53477 | 121597 | 949785  | 31745 | 47329 |
| 36 | 60 | 3 | 5 | 2 | 2 | 300 | 0   | 424889 | 849778 | 38075867 | 2510900 | 52262 | 123503 | 920268  | 31497 | 47832 |
| 37 | 60 | 3 | 5 | 6 | 6 | 300 | 0   | 162472 | 974832 | 48737933 | 2811762 | 65250 | 138868 | 1225480 | 47191 | 56526 |
| 38 | 60 | 1 | 3 | 5 | 5 | 400 | 2.5 | 86344  | 431720 | 23019942 | 1771894 | 34874 | 95768  | 508577  | 16940 | 28186 |
| 39 | 60 | 1 | 7 | 3 | 3 | 400 | 2.5 | 170745 | 512235 | 24053003 | 1861847 | 34418 | 94515  | 523775  | 19790 | 31983 |
| 40 | 60 | 2 | 3 | 3 | 3 | 400 | 2.5 | 146661 | 439983 | 22881242 | 1820820 | 31948 | 95919  | 501563  | 16052 | 27400 |
| 41 | 60 | 3 | 3 | 5 | 5 | 400 | 2.5 | 161403 | 807015 | 38727620 | 2325039 | 54140 | 121920 | 932843  | 37307 | 53641 |
| 42 | 60 | 3 | 7 | 3 | 3 | 400 | 2.5 | 310670 | 932010 | 42612475 | 2710385 | 55925 | 126744 | 1041947 | 34383 | 52128 |
| 43 | 60 | 1 | 3 | 3 | 3 | 400 | 5   | 75574  | 226722 | 13989500 | 1584931 | 20939 | 80689  | 276076  | 0     | 17470 |
| 44 | 60 | 1 | 7 | 5 | 5 | 400 | 5   | 140579 | 702895 | 32283733 | 2218004 | 44435 | 107362 | 735427  | 23128 | 36972 |
| 45 | 60 | 2 | 3 | 5 | 5 | 400 | 5   | 133158 | 665790 | 31584791 | 2145662 | 44659 | 108447 | 739179  | 22803 | 34646 |
| 46 | 60 | 2 | 7 | 3 | 3 | 400 | 5   | 250507 | 751521 | 33159434 | 2302055 | 45935 | 112481 | 786815  | 25347 | 38147 |
| 47 | 60 | 3 | 3 | 3 | 3 | 400 | 5   | 188915 | 566745 | 26969737 | 1920589 | 37963 | 102044 | 612689  | 21163 | 32348 |
| 48 | 60 | 3 | 7 | 5 | 5 | 400 | 5   | 195420 | 977100 | 46984062 | 2882793 | 61206 | 131495 | 1132450 | 42651 | 61520 |
| 49 | 60 | 1 | 5 | 4 | 4 | 500 | 0   | 139081 | 556324 | 27234721 | 2070088 | 39431 | 101844 | 606966  | 22060 | 35263 |
| 50 | 60 | 2 | 5 | 4 | 4 | 500 | 0   | 199675 | 798700 | 38193506 | 2566927 | 52129 | 118699 | 909920  | 29952 | 47398 |
| 51 | 60 | 3 | 5 | 4 | 4 | 500 | 0   | 204230 | 816920 | 48027490 | 3153702 | 64032 | 145916 | 1161996 | 39479 | 56850 |
| 52 | 70 | 1 | 5 | 4 | 4 | 100 | 0   | 235758 | 943032 | 42233988 | 3900474 | 59223 | 130408 | 1003534 | 0     | 53786 |
| 53 | 70 | 1 | 3 | 5 | 5 | 200 | 2.5 | 171736 | 858680 | 39207743 | 3389893 | 54825 | 121200 | 917625  | 31300 | 48200 |

|    |    |   |   |   |   |     |     |        |         |          |         |       |        |         |       |       |
|----|----|---|---|---|---|-----|-----|--------|---------|----------|---------|-------|--------|---------|-------|-------|
| 54 | 70 | 1 | 7 | 5 | 5 | 200 | 5   | 192126 | 960630  | 44274838 | 3499105 | 58333 | 130606 | 1049242 | 37222 | 60556 |
| 55 | 70 | 2 | 5 | 2 | 2 | 300 | 0   | 460904 | 921808  | 43064391 | 2824913 | 58574 | 132106 | 1059789 | 33802 | 51941 |
| 56 | 70 | 1 | 5 | 4 | 4 | 300 | 7.5 | 200528 | 802112  | 36854535 | 3009407 | 49799 | 118040 | 864148  | 29248 | 44564 |
| 57 | 70 | 1 | 7 | 3 | 3 | 200 | 2.5 | 308172 | 924516  | 42733596 | 3758637 | 57905 | 128472 | 1011648 | 33663 | 50819 |
| 58 | 70 | 2 | 3 | 3 | 3 | 200 | 2.5 | 314345 | 943035  | 43059102 | 3367441 | 57779 | 130279 | 1028103 | 34235 | 56353 |
| 59 | 70 | 2 | 7 | 5 | 5 | 200 | 2.5 | 202855 | 1014275 | 48868417 | 3944067 | 63125 | 135650 | 1168250 | 41925 | 59100 |
| 60 | 70 | 3 | 7 | 3 | 3 | 200 | 2.5 | 340176 | 1020528 | 46420722 | 2851139 | 62045 | 136537 | 1137657 | 38970 | 55925 |
| 61 | 70 | 1 | 3 | 3 | 3 | 200 | 5   | 232409 | 697227  | 31286541 | 2511762 | 44864 | 112492 | 720362  | 21844 | 38698 |
| 62 | 70 | 1 | 5 | 4 | 4 | 300 | 0   | 218340 | 873360  | 41026487 | 3138300 | 55518 | 123839 | 982836  | 33017 | 51799 |
| 63 | 70 | 2 | 3 | 5 | 5 | 200 | 5   | 197146 | 985730  | 45497256 | 3130191 | 61244 | 134652 | 1101716 | 36244 | 55473 |
| 64 | 70 | 2 | 7 | 3 | 3 | 200 | 5   | 337236 | 1011708 | 47549038 | 3444219 | 63348 | 137045 | 1150758 | 40652 | 60879 |
| 65 | 70 | 3 | 3 | 3 | 3 | 200 | 5   | 324839 | 974517  | 44249628 | 2991787 | 61797 | 133634 | 1092223 | 36416 | 53183 |
| 66 | 70 | 3 | 5 | 2 | 2 | 300 | 0   | 479396 | 958792  | 44838865 | 3069113 | 58148 | 130517 | 1099383 | 35631 | 53725 |
| 67 | 70 | 3 | 3 | 5 | 5 | 200 | 2.5 | 197379 | 986895  | 43739115 | 2361943 | 61515 | 131187 | 1075051 | 36894 | 54394 |
| 68 | 70 | 3 | 7 | 5 | 5 | 200 | 5   | 200051 | 1000255 | 47373997 | 2598922 | 63675 | 138550 | 1163925 | 40675 | 60500 |
| 69 | 70 | 1 | 5 | 4 | 4 | 300 | 0   | 220765 | 883060  | 40590686 | 2554419 | 55120 | 124293 | 980720  | 35000 | 52827 |
| 70 | 70 | 2 | 5 | 4 | 4 | 100 | 0   | 245930 | 983720  | 44348258 | 4266493 | 65294 | 136275 | 1049725 | 0     | 56784 |
| 71 | 70 | 3 | 5 | 4 | 4 | 100 | 0   | 241327 | 965308  | 45162392 | 4366969 | 65769 | 137462 | 1075654 | 0     | 56115 |
| 72 | 70 | 1 | 5 | 2 | 2 | 300 | 0   | 321387 | 642774  | 29859318 | 2715299 | 41479 | 107076 | 668119  | 22535 | 37551 |

|    |    |   |   |   |   |     |     |        |         |          |         |       |        |         |       |       |
|----|----|---|---|---|---|-----|-----|--------|---------|----------|---------|-------|--------|---------|-------|-------|
| 73 | 70 | 1 | 5 | 6 | 6 | 300 | 0   | 154747 | 928482  | 44448956 | 3487055 | 60947 | 128645 | 1069086 | 31026 | 53368 |
| 74 | 70 | 1 | 5 | 4 | 4 | 300 | 0   | 215476 | 861904  | 41666050 | 3265945 | 55331 | 124918 | 1001141 | 32472 | 49744 |
| 75 | 70 | 1 | 5 | 4 | 4 | 300 | 0   | 227420 | 909680  | 43083255 | 3772914 | 56763 | 128535 | 1019010 | 34368 | 50528 |
| 76 | 70 | 1 | 7 | 5 | 5 | 400 | 2.5 | 188037 | 940185  | 45747663 | 3252038 | 58425 | 127663 | 1095025 | 38013 | 58275 |
| 77 | 70 | 1 | 3 | 5 | 5 | 400 | 5   | 130748 | 653740  | 32302218 | 2880283 | 44206 | 108486 | 731638  | 24256 | 38524 |
| 78 | 70 | 1 | 1 | 4 | 4 | 300 | 0   | 12845  | 51380   | 6093834  | 1701635 | 0     | 63734  | 97980   | 0     | 0     |
| 79 | 70 | 1 | 9 | 4 | 4 | 300 | 0   | 224658 | 898632  | 40378975 | 3219895 | 53640 | 123547 | 948453  | 33227 | 48907 |
| 80 | 70 | 2 | 5 | 4 | 4 | 300 | 7.5 | 240603 | 962412  | 45451646 | 3284878 | 59921 | 131593 | 1104407 | 36761 | 57731 |
| 81 | 70 | 3 | 5 | 4 | 4 | 300 | 7.5 | 252181 | 1008724 | 47256293 | 3372491 | 61545 | 134310 | 1133993 | 39446 | 59894 |
| 82 | 70 | 2 | 5 | 4 | 4 | 300 | 0   | 242760 | 971040  | 45755382 | 3309907 | 60106 | 129595 | 1100784 | 37090 | 57887 |
| 83 | 70 | 2 | 5 | 4 | 4 | 300 | 0   | 245360 | 981440  | 47663477 | 3838344 | 61293 | 134547 | 1137387 | 37213 | 54547 |
| 84 | 70 | 2 | 5 | 4 | 4 | 300 | 0   | 246004 | 984016  | 46119260 | 3028863 | 61245 | 132331 | 1118013 | 39656 | 60358 |
| 85 | 70 | 2 | 5 | 4 | 4 | 300 | 0   | 250738 | 1002952 | 48267744 | 4221426 | 62980 | 135894 | 1153669 | 38291 | 59616 |
| 86 | 70 | 2 | 1 | 4 | 4 | 300 | 0   | 19803  | 79212   | 7889881  | 1907161 | 0     | 69954  | 125769  | 0     | 0     |
| 87 | 70 | 2 | 9 | 4 | 4 | 300 | 0   | 246389 | 985556  | 46079082 | 2887360 | 59894 | 132278 | 1110901 | 38477 | 60013 |
| 88 | 70 | 3 | 5 | 4 | 4 | 300 | 0   | 245786 | 983144  | 46769803 | 3502055 | 60848 | 132026 | 1128993 | 39113 | 57377 |
| 89 | 70 | 3 | 5 | 4 | 4 | 300 | 0   | 249414 | 997656  | 47857781 | 3380351 | 61836 | 136302 | 1163226 | 40262 | 59921 |
| 90 | 70 | 1 | 3 | 3 | 3 | 400 | 2.5 | 137642 | 412926  | 22234497 | 2411299 | 31708 | 93364  | 466923  | 14911 | 25745 |
| 91 | 70 | 1 | 5 | 4 | 4 | 500 | 0   | 178108 | 712432  | 35431624 | 2452923 | 48152 | 112697 | 845651  | 27527 | 45788 |

|     |    |   |   |   |   |     |     |        |         |          |          |       |        |         |       |       |
|-----|----|---|---|---|---|-----|-----|--------|---------|----------|----------|-------|--------|---------|-------|-------|
| 92  | 70 | 2 | 3 | 5 | 5 | 400 | 2.5 | 176052 | 880260  | 44266943 | 3055448  | 57198 | 124309 | 1064309 | 34661 | 54975 |
| 93  | 70 | 2 | 7 | 3 | 3 | 400 | 2.5 | 318495 | 955485  | 44855888 | 3012846  | 57756 | 129292 | 1093788 | 35843 | 54464 |
| 94  | 70 | 3 | 3 | 3 | 3 | 400 | 2.5 | 267350 | 802050  | 38097136 | 2508852  | 51246 | 118761 | 920052  | 30522 | 46500 |
| 95  | 70 | 3 | 7 | 5 | 5 | 400 | 2.5 | 203265 | 1016325 | 50219429 | 3699318  | 62184 | 134888 | 1201625 | 41625 | 63226 |
| 96  | 70 | 1 | 7 | 3 | 3 | 400 | 5   | 261173 | 783519  | 35463327 | 2733702  | 47716 | 114905 | 827454  | 26768 | 41491 |
| 97  | 70 | 2 | 3 | 3 | 3 | 400 | 5   | 215714 | 647142  | 31362814 | 2566981  | 43332 | 108075 | 718234  | 24112 | 36030 |
| 98  | 70 | 2 | 7 | 5 | 5 | 400 | 5   | 200130 | 1000650 | 49002788 | 3008522  | 62152 | 134055 | 1185659 | 38595 | 57264 |
| 99  | 70 | 3 | 3 | 5 | 5 | 400 | 5   | 190054 | 950270  | 46045472 | 3828484  | 59125 | 129075 | 1098775 | 38325 | 55688 |
| 100 | 70 | 3 | 7 | 3 | 3 | 400 | 5   | 328968 | 986904  | 47544445 | 3573214  | 59642 | 133269 | 1159030 | 37075 | 56343 |
| 101 | 70 | 3 | 5 | 4 | 4 | 300 | 0   | 245726 | 982904  | 47638644 | 4096824  | 61103 | 132678 | 1135322 | 38937 | 58658 |
| 102 | 70 | 3 | 5 | 4 | 4 | 300 | 0   | 248065 | 992260  | 48768653 | 3546799  | 62967 | 136689 | 1181629 | 38689 | 57589 |
| 103 | 70 | 3 | 9 | 4 | 4 | 300 | 0   | 275002 | 1100008 | 53332842 | 3918882  | 66320 | 152480 | 1275933 | 45160 | 67280 |
| 104 | 70 | 2 | 5 | 4 | 4 | 500 | 0   | 240652 | 962608  | 46567691 | 3274875  | 59488 | 131664 | 1133056 | 36152 | 55328 |
| 105 | 70 | 3 | 1 | 4 | 4 | 300 | 0   | 32874  | 131496  | 10561084 | 1951058  | 0     | 73638  | 182188  | 0     | 0     |
| 106 | 70 | 3 | 5 | 4 | 4 | 500 | 0   | 245509 | 982036  | 47563356 | 3341745  | 59727 | 132345 | 1157868 | 37555 | 56104 |
| 107 | 70 | 2 | 5 | 6 | 6 | 300 | 0   | 161009 | 966054  | 47517559 | 4286988  | 62144 | 131016 | 1114289 | 40033 | 55298 |
| 108 | 70 | 3 | 5 | 6 | 6 | 300 | 0   | 163812 | 982872  | 48279858 | 2747687  | 64839 | 135482 | 1196459 | 38164 | 58898 |
| 109 | 80 | 2 | 5 | 4 | 4 | 100 | 0   | 256967 | 1027868 | 47630348 | 5061828  | 65840 | 144200 | 1126240 | 0     | 63000 |
| 110 | 80 | 2 | 5 | 4 | 4 | 100 | 0   | 256507 | 1026028 | 42949532 | 19000692 | 65520 | 150480 | 1070920 | 0     | 56760 |

|     |    |   |   |   |   |     |     |        |         |          |          |       |        |         |       |       |
|-----|----|---|---|---|---|-----|-----|--------|---------|----------|----------|-------|--------|---------|-------|-------|
| 111 | 80 | 3 | 5 | 4 | 4 | 100 | 0   | 280031 | 1120124 | 50635902 | 4312562  | 71845 | 164932 | 1227767 | 0     | 60816 |
| 112 | 80 | 3 | 5 | 4 | 4 | 100 | 0   | 267530 | 1070120 | 47191088 | 20613128 | 70960 | 151800 | 1153480 | 0     | 56720 |
| 113 | 80 | 1 | 5 | 4 | 4 | 100 | 0   | 255291 | 1021164 | 44132255 | 3611695  | 64960 | 147000 | 1062000 | 0     | 56960 |
| 114 | 80 | 1 | 5 | 4 | 4 | 100 | 0   | 262281 | 1049124 | 46613714 | 4749949  | 66078 | 152471 | 1109020 | 0     | 63765 |
| 115 | 80 | 1 | 5 | 4 | 4 | 300 | 7.5 | 247093 | 988372  | 45603486 | 3121947  | 59289 | 134461 | 1116158 | 38658 | 59197 |
| 116 | 80 | 2 | 5 | 4 | 4 | 300 | 7.5 | 252352 | 1009408 | 48895091 | 3615304  | 63333 | 138987 | 1191000 | 39293 | 56827 |
| 117 | 80 | 1 | 3 | 3 | 3 | 200 | 2.5 | 305043 | 915129  | 41929330 | 3109827  | 58372 | 129030 | 1013518 | 37613 | 48090 |
| 118 | 80 | 1 | 5 | 4 | 4 | 300 | 7.5 | 243174 | 972696  | 45375838 | 3421343  | 61413 | 133030 | 1093426 | 36145 | 54733 |
| 119 | 80 | 1 | 7 | 5 | 5 | 200 | 2.5 | 201451 | 1007255 | 48437484 | 2709142  | 67302 | 143688 | 1215767 | 54851 | 63045 |
| 120 | 80 | 1 | 7 | 3 | 3 | 200 | 2.5 | 338113 | 1014339 | 48644955 | 3432723  | 64005 | 138754 | 1169734 | 41291 | 57768 |
| 121 | 80 | 2 | 3 | 5 | 5 | 200 | 2.5 | 197395 | 986975  | 46336568 | 20447893 | 62450 | 134325 | 1108725 | 34625 | 57850 |
| 122 | 80 | 2 | 7 | 3 | 3 | 200 | 2.5 | 335179 | 1005537 | 47460421 | 3723376  | 62683 | 138905 | 1145005 | 44216 | 64372 |
| 123 | 80 | 2 | 3 | 3 | 3 | 200 | 2.5 | 337675 | 1013025 | 45713931 | 3480916  | 63179 | 139284 | 1106104 | 35925 | 54388 |
| 124 | 80 | 2 | 7 | 5 | 5 | 200 | 2.5 | 202669 | 1013345 | 47766804 | 21211904 | 62562 | 137811 | 1156791 | 39677 | 56318 |
| 125 | 80 | 3 | 3 | 3 | 3 | 200 | 2.5 | 337649 | 1012947 | 47910574 | 3614441  | 63118 | 138500 | 1145662 | 40162 | 55132 |
| 126 | 80 | 3 | 7 | 5 | 5 | 200 | 2.5 | 210287 | 1051435 | 49473863 | 2961913  | 66825 | 149525 | 1221025 | 43250 | 61825 |
| 127 | 80 | 3 | 3 | 5 | 5 | 200 | 2.5 | 206673 | 1033365 | 56469788 | 9725141  | 66187 | 145000 | 1175429 | 41793 | 55429 |
| 128 | 80 | 3 | 7 | 3 | 3 | 200 | 2.5 | 351837 | 1055511 | 51272881 | 3270403  | 67090 | 152179 | 1255000 | 43716 | 62433 |
| 129 | 80 | 1 | 3 | 5 | 5 | 200 | 2.5 | 310565 | 1552825 | 70022206 | 4176738  | 99286 | 221847 | 1708818 | 61527 | 85025 |

|     |    |   |   |   |   |     |     |        |         |          |          |       |        |         |       |       |
|-----|----|---|---|---|---|-----|-----|--------|---------|----------|----------|-------|--------|---------|-------|-------|
| 130 | 80 | 1 | 7 | 3 | 3 | 200 | 5   | 340634 | 1021902 | 47166501 | 3008090  | 65183 | 145530 | 1165515 | 38406 | 58619 |
| 131 | 80 | 1 | 3 | 3 | 3 | 200 | 5   | 308962 | 926886  | 41705681 | 2579178  | 56365 | 132133 | 1018049 | 33887 | 50261 |
| 132 | 80 | 1 | 3 | 5 | 5 | 200 | 5   | 197010 | 985050  | 46047619 | 3894847  | 64010 | 143292 | 1116411 | 35792 | 56213 |
| 133 | 80 | 2 | 3 | 3 | 3 | 200 | 5   | 333639 | 1000917 | 46678621 | 3353427  | 65985 | 138358 | 1133433 | 46731 | 61090 |
| 134 | 80 | 2 | 7 | 5 | 5 | 200 | 5   | 202388 | 1011940 | 47601103 | 4132736  | 60452 | 139447 | 1115352 | 37010 | 55804 |
| 135 | 80 | 2 | 3 | 5 | 5 | 200 | 5   | 202162 | 1010810 | 48071854 | 3928785  | 66361 | 137847 | 1132599 | 37153 | 55718 |
| 136 | 80 | 2 | 7 | 3 | 3 | 200 | 5   | 338582 | 1015746 | 46513120 | 3205344  | 60284 | 137403 | 1122731 | 37642 | 58657 |
| 137 | 80 | 3 | 3 | 5 | 5 | 200 | 5   | 204851 | 1024255 | 48045622 | 3662886  | 63706 | 140920 | 1140547 | 40995 | 57687 |
| 138 | 80 | 3 | 7 | 3 | 3 | 200 | 5   | 351105 | 1053315 | 49489749 | 3539005  | 62442 | 144437 | 1187472 | 39151 | 57000 |
| 139 | 80 | 3 | 3 | 3 | 3 | 200 | 5   | 352571 | 1057713 | 49246262 | 3085082  | 64335 | 148110 | 1204080 | 34230 | 56940 |
| 140 | 80 | 3 | 7 | 5 | 5 | 200 | 5   | 319377 | 1596885 | 77914449 | 5774643  | 97330 | 218519 | 1852913 | 70388 | 91044 |
| 141 | 80 | 2 | 5 | 4 | 4 | 300 | 7.5 | 247948 | 991792  | 49852589 | 3756283  | 64080 | 141400 | 1211520 | 43093 | 65187 |
| 142 | 80 | 3 | 5 | 4 | 4 | 300 | 7.5 | 233287 | 933148  | 46094039 | 3500589  | 57181 | 129933 | 1087315 | 43356 | 57195 |
| 143 | 80 | 3 | 5 | 4 | 4 | 300 | 7.5 | 232276 | 929104  | 46624471 | 3470823  | 73661 | 136133 | 1131894 | 42870 | 61050 |
| 144 | 80 | 1 | 7 | 5 | 5 | 200 | 5   | 199361 | 996805  | 47481799 | 20560537 | 65545 | 134851 | 1156683 | 37847 | 57376 |
| 145 | 80 | 1 | 5 | 4 | 4 | 300 | 0   | 341414 | 1365656 | 63623285 | 4577653  | 81284 | 186970 | 1539746 | 46020 | 75599 |
| 146 | 80 | 1 | 5 | 4 | 4 | 300 | 0   | 249682 | 998728  | 45732105 | 2674316  | 60316 | 135697 | 1121908 | 38434 | 57868 |
| 147 | 80 | 1 | 5 | 4 | 4 | 300 | 0   | 248608 | 994432  | 47004152 | 3240852  | 61003 | 134865 | 1153980 | 42587 | 60198 |
| 148 | 80 | 1 | 1 | 4 | 4 | 300 | 0   | 28861  | 115444  | 8890540  | 1258460  | 0     | 73316  | 165900  | 0     | 0     |



|     |    |   |   |   |   |     |   |        |         |          |          |       |        |         |       |       |
|-----|----|---|---|---|---|-----|---|--------|---------|----------|----------|-------|--------|---------|-------|-------|
| 149 | 80 | 1 | 9 | 4 | 4 | 300 | 0 | 263393 | 1053572 | 56409257 | 4127799  | 64589 | 123304 | 1304923 | 46288 | 66381 |
| 150 | 80 | 1 | 5 | 4 | 4 | 300 | 0 | 253015 | 1012060 | 46888076 | 3188276  | 62187 | 137493 | 1160587 | 38507 | 54907 |
| 151 | 80 | 1 | 5 | 4 | 4 | 300 | 0 | 250308 | 1001232 | 46512877 | 2746904  | 62539 | 134487 | 1134566 | 41395 | 60355 |
| 152 | 80 | 1 | 5 | 4 | 4 | 300 | 0 | 260179 | 1040716 | 50125703 | 3445558  | 67355 | 145474 | 1204026 | 37566 | 57329 |
| 153 | 80 | 1 | 5 | 2 | 2 | 300 | 0 | 430171 | 860342  | 39162664 | 2688137  | 53213 | 126167 | 949047  | 31260 | 47827 |
| 154 | 80 | 1 | 5 | 6 | 6 | 300 | 0 | 168840 | 1013040 | 50173510 | 5232250  | 63440 | 136060 | 1152420 | 42760 | 59440 |
| 155 | 80 | 1 | 5 | 4 | 4 | 300 | 0 | 142202 | 568808  | 27812539 | 11975645 | 38093 | 114173 | 611613  | 22387 | 32600 |
| 156 | 80 | 1 | 5 | 4 | 4 | 300 | 0 | 142078 | 568312  | 28005358 | 2454918  | 37133 | 114267 | 610280  | 22107 | 35040 |
| 157 | 80 | 1 | 1 | 4 | 4 | 300 | 0 | 26263  | 105052  | 8865824  | 1731871  | 0     | 73262  | 154724  | 0     | 0     |
| 158 | 80 | 1 | 9 | 4 | 4 | 300 | 0 | 260351 | 1041404 | 50606762 | 3719886  | 64261 | 120105 | 1209686 | 41987 | 65268 |
| 159 | 80 | 2 | 5 | 4 | 4 | 300 | 0 | 253472 | 1013888 | 47615669 | 2836146  | 63113 | 138132 | 1176013 | 39709 | 54305 |
| 160 | 80 | 2 | 5 | 4 | 4 | 300 | 0 | 256604 | 1026416 | 49650838 | 3631694  | 66167 | 146301 | 1217124 | 43130 | 59452 |
| 161 | 80 | 2 | 5 | 4 | 4 | 300 | 0 | 252614 | 1010456 | 47401463 | 2923676  | 61200 | 136787 | 1157173 | 37787 | 55453 |
| 162 | 80 | 1 | 5 | 2 | 2 | 300 | 0 | 424422 | 848844  | 39101461 | 2601283  | 53287 | 122673 | 956957  | 31122 | 47175 |
| 163 | 80 | 1 | 5 | 6 | 6 | 300 | 0 | 166033 | 996198  | 46752108 | 3457525  | 63915 | 135541 | 1108662 | 38774 | 55318 |
| 164 | 80 | 2 | 5 | 4 | 4 | 300 | 0 | 253391 | 1013564 | 48719299 | 3201483  | 60855 | 140789 | 1179026 | 40592 | 61066 |
| 165 | 80 | 2 | 1 | 4 | 4 | 300 | 0 | 53617  | 214468  | 14054500 | 1728148  | 21196 | 77595  | 267402  | 0     | 19003 |
| 166 | 80 | 2 | 9 | 4 | 4 | 300 | 0 | 238733 | 954932  | 49861945 | 3703094  | 58139 | 131393 | 1193201 | 40977 | 62139 |
| 167 | 80 | 2 | 5 | 4 | 4 | 300 | 0 | 241643 | 966572  | 46239313 | 3383549  | 58144 | 127935 | 1104026 | 39856 | 52418 |

|     |    |   |   |   |   |     |   |        |         |          |         |       |        |         |       |       |
|-----|----|---|---|---|---|-----|---|--------|---------|----------|---------|-------|--------|---------|-------|-------|
| 168 | 80 | 2 | 5 | 4 | 4 | 300 | 0 | 233029 | 932116  | 46341906 | 3356104 | 58344 | 129020 | 1104795 | 39642 | 59868 |
| 169 | 80 | 2 | 5 | 4 | 4 | 300 | 0 | 241908 | 967632  | 47530838 | 3502798 | 59507 | 129840 | 1136840 | 37187 | 58013 |
| 170 | 80 | 2 | 5 | 2 | 2 | 300 | 0 | 465860 | 931720  | 44312055 | 3000731 | 54890 | 127110 | 1079284 | 35284 | 51077 |
| 171 | 80 | 2 | 5 | 6 | 6 | 300 | 0 | 157793 | 946758  | 47414476 | 3832021 | 72742 | 128609 | 1111104 | 36140 | 56448 |
| 172 | 80 | 2 | 5 | 4 | 4 | 300 | 0 | 238248 | 952992  | 48257774 | 3284767 | 60027 | 131423 | 1163718 | 39141 | 51329 |
| 173 | 80 | 2 | 1 | 4 | 4 | 300 | 0 | 53651  | 214604  | 14748419 | 2626166 | 20387 | 82773  | 262520  | 0     | 16813 |
| 174 | 80 | 2 | 9 | 4 | 4 | 300 | 0 | 245146 | 980584  | 49134268 | 3113048 | 60682 | 134754 | 1179187 | 39043 | 60774 |
| 175 | 80 | 3 | 5 | 4 | 4 | 300 | 0 | 236035 | 944140  | 45974485 | 2957774 | 58577 | 130228 | 1103463 | 36268 | 55745 |
| 176 | 80 | 3 | 5 | 4 | 4 | 300 | 0 | 237767 | 951068  | 47390520 | 3577441 | 61961 | 128526 | 1127434 | 40303 | 60697 |
| 177 | 80 | 3 | 5 | 4 | 4 | 300 | 0 | 236823 | 947292  | 45501259 | 2772821 | 58278 | 130755 | 1095589 | 39841 | 57391 |
| 178 | 80 | 2 | 5 | 2 | 2 | 300 | 0 | 474614 | 949228  | 44806658 | 2978638 | 56747 | 126492 | 1097111 | 34714 | 52047 |
| 179 | 80 | 2 | 5 | 6 | 6 | 300 | 0 | 184996 | 1109976 | 55340547 | 3902467 | 67711 | 154691 | 1326161 | 54181 | 70027 |
| 180 | 80 | 3 | 5 | 4 | 4 | 300 | 0 | 237386 | 949544  | 47571049 | 3692889 | 59640 | 130880 | 1133707 | 40000 | 62000 |
| 181 | 80 | 3 | 1 | 4 | 4 | 300 | 0 | 74938  | 299752  | 18615081 | 2479335 | 24147 | 85097  | 359010  | 0     | 22555 |
| 182 | 80 | 3 | 9 | 4 | 4 | 300 | 0 | 242482 | 969928  | 48099004 | 3758467 | 58617 | 134685 | 1128215 | 36349 | 54564 |
| 183 | 80 | 3 | 5 | 4 | 4 | 300 | 0 | 242256 | 969024  | 46972200 | 3743256 | 56813 | 130400 | 1120236 | 33115 | 53587 |
| 184 | 80 | 3 | 5 | 4 | 4 | 300 | 0 | 237211 | 948844  | 46472750 | 3406993 | 59738 | 128800 | 1115384 | 36525 | 53744 |
| 185 | 80 | 3 | 5 | 4 | 4 | 300 | 0 | 236004 | 944016  | 45627711 | 2837031 | 60000 | 129254 | 1102812 | 42323 | 64277 |
| 186 | 80 | 3 | 5 | 2 | 2 | 300 | 0 | 464067 | 928134  | 44402797 | 2989479 | 54749 | 127425 | 1090314 | 36388 | 53987 |

|     |    |   |   |   |   |     |     |        |        |          |          |       |        |         |       |       |
|-----|----|---|---|---|---|-----|-----|--------|--------|----------|----------|-------|--------|---------|-------|-------|
| 187 | 80 | 3 | 5 | 6 | 6 | 300 | 0   | 155121 | 930726 | 47456253 | 21552139 | 62980 | 135201 | 1107544 | 44477 | 55510 |
| 188 | 80 | 3 | 5 | 4 | 4 | 300 | 0   | 237210 | 948840 | 46395252 | 3404788  | 59377 | 127510 | 1111947 | 34848 | 53974 |
| 189 | 80 | 3 | 1 | 4 | 4 | 300 | 0   | 79539  | 318156 | 18751349 | 2050557  | 24617 | 87020  | 379248  | 0     | 23960 |
| 190 | 80 | 3 | 9 | 4 | 4 | 300 | 0   | 239390 | 957560 | 46950496 | 3282193  | 59263 | 131882 | 1118066 | 40158 | 53079 |
| 191 | 80 | 1 | 5 | 4 | 4 | 300 | 0   | 242001 | 968004 | 44699701 | 2777406  | 60872 | 131718 | 1083812 | 35060 | 55007 |
| 192 | 80 | 2 | 3 | 3 | 3 | 400 | 2.5 | 287109 | 861327 | 41850318 | 3271585  | 52860 | 121043 | 999855  | 30953 | 47910 |
| 193 | 80 | 3 | 5 | 2 | 2 | 300 | 0   | 467041 | 934082 | 44695390 | 2967804  | 55244 | 127645 | 1098388 | 36328 | 53799 |
| 194 | 80 | 3 | 3 | 5 | 5 | 400 | 2.5 | 188546 | 942730 | 48018146 | 2959904  | 58853 | 129476 | 1149875 | 35873 | 54414 |
| 195 | 80 | 3 | 5 | 6 | 6 | 300 | 0   | 151288 | 907728 | 46347766 | 3453131  | 61192 | 133490 | 1117669 | 38483 | 53702 |
| 196 | 80 | 1 | 3 | 5 | 5 | 400 | 2.5 | 172441 | 862205 | 41067678 | 2494282  | 53097 | 115137 | 974527  | 33333 | 46741 |
| 197 | 80 | 1 | 3 | 5 | 5 | 400 | 2.5 | 170790 | 853950 | 40719859 | 2402533  | 52923 | 114092 | 968209  | 34328 | 49154 |
| 198 | 80 | 1 | 3 | 5 | 5 | 400 | 2.5 | 170151 | 850755 | 40805728 | 2529049  | 53756 | 116381 | 967363  | 34440 | 55012 |
| 199 | 80 | 1 | 7 | 3 | 3 | 400 | 2.5 | 311114 | 933342 | 45388030 | 2918332  | 53761 | 126045 | 1113359 | 37496 | 54516 |
| 200 | 80 | 1 | 3 | 3 | 3 | 400 | 2.5 | 214431 | 643293 | 30866341 | 2526027  | 41410 | 104612 | 701463  | 27978 | 38104 |
| 201 | 80 | 1 | 7 | 5 | 5 | 400 | 2.5 | 192233 | 961165 | 49722215 | 3711478  | 59325 | 128625 | 1177063 | 37313 | 58288 |
| 202 | 80 | 2 | 7 | 5 | 5 | 400 | 2.5 | 187780 | 938900 | 48473666 | 3695324  | 65773 | 131434 | 1145786 | 36446 | 59676 |
| 203 | 80 | 2 | 3 | 5 | 5 | 400 | 2.5 | 186282 | 931410 | 44610120 | 2763378  | 56082 | 123072 | 1066692 | 40249 | 60025 |
| 204 | 80 | 2 | 7 | 3 | 3 | 400 | 2.5 | 331339 | 994017 | 49633410 | 3403024  | 58730 | 134168 | 1197988 | 39260 | 57616 |
| 205 | 80 | 2 | 3 | 5 | 5 | 400 | 5   | 184056 | 920280 | 46430444 | 2839327  | 62072 | 127878 | 1106030 | 34020 | 54491 |

|     |    |   |   |   |   |     |     |        |        |          |         |       |        |         |       |       |
|-----|----|---|---|---|---|-----|-----|--------|--------|----------|---------|-------|--------|---------|-------|-------|
| 206 | 80 | 3 | 7 | 5 | 5 | 400 | 2.5 | 191564 | 957820 | 48597060 | 3519808 | 60784 | 133955 | 1164540 | 40100 | 59701 |
| 207 | 80 | 3 | 7 | 3 | 3 | 400 | 2.5 | 316427 | 949281 | 47900823 | 3383717 | 58379 | 132256 | 1160631 | 38374 | 56148 |
| 208 | 80 | 3 | 3 | 3 | 3 | 400 | 2.5 | 304651 | 913953 | 43932559 | 3081722 | 53585 | 123778 | 1068393 | 33941 | 51252 |
| 209 | 80 | 3 | 7 | 5 | 5 | 400 | 5   | 188026 | 940130 | 47599226 | 3045980 | 59055 | 131244 | 1149726 | 41206 | 55585 |
| 210 | 80 | 1 | 3 | 3 | 3 | 400 | 5   | 213413 | 640239 | 32396021 | 2926245 | 42097 | 105694 | 735560  | 22246 | 36978 |
| 211 | 80 | 1 | 7 | 5 | 5 | 400 | 5   | 190517 | 952585 | 48416524 | 3507574 | 60877 | 128049 | 1140926 | 44037 | 58383 |
| 212 | 80 | 1 | 3 | 5 | 5 | 400 | 5   | 166774 | 833870 | 41488701 | 2850639 | 54288 | 119363 | 990750  | 30763 | 50163 |
| 213 | 80 | 1 | 7 | 3 | 3 | 400 | 5   | 300197 | 900591 | 43755682 | 2899726 | 55111 | 124941 | 1086096 | 33585 | 50919 |
| 214 | 80 | 2 | 7 | 3 | 3 | 400 | 5   | 324458 | 973374 | 48643109 | 3402818 | 57030 | 132539 | 1193424 | 37257 | 59626 |
| 215 | 80 | 2 | 3 | 3 | 3 | 400 | 5   | 281383 | 844149 | 40913046 | 2872398 | 51514 | 119799 | 985846  | 31377 | 52861 |
| 216 | 80 | 2 | 7 | 5 | 5 | 400 | 5   | 194056 | 970280 | 50778506 | 4244126 | 61055 | 136203 | 1183660 | 39888 | 55881 |
| 217 | 80 | 3 | 3 | 3 | 3 | 400 | 5   | 304948 | 914844 | 44199087 | 2846350 | 56639 | 125895 | 1083669 | 34767 | 53714 |
| 218 | 80 | 3 | 3 | 5 | 5 | 400 | 5   | 186728 | 933640 | 47152614 | 3068419 | 59183 | 126634 | 1135804 | 37797 | 51559 |
| 219 | 80 | 3 | 7 | 3 | 3 | 400 | 5   | 321830 | 965490 | 48281777 | 3129531 | 59487 | 133862 | 1197565 | 37485 | 57317 |
| 220 | 80 | 1 | 5 | 4 | 4 | 500 | 0   | 232217 | 928868 | 45063200 | 3411640 | 54176 | 125232 | 1080608 | 36024 | 51288 |
| 221 | 80 | 1 | 5 | 4 | 4 | 500 | 0   | 220197 | 880788 | 43887309 | 2750628 | 54186 | 122273 | 1061735 | 34535 | 53180 |
| 222 | 80 | 2 | 5 | 4 | 4 | 500 | 0   | 242902 | 971608 | 48858700 | 3190149 | 59329 | 135633 | 1178890 | 39170 | 58555 |
| 223 | 80 | 2 | 5 | 4 | 4 | 500 | 0   | 243382 | 973528 | 49002869 | 3323820 | 59184 | 131081 | 1188372 | 38891 | 56863 |
| 224 | 80 | 3 | 5 | 4 | 4 | 500 | 0   | 233614 | 934456 | 46568638 | 2942449 | 56481 | 127840 | 1130741 | 36128 | 60641 |

|     |     |   |   |   |   |     |     |        |         |          |          |       |        |         |       |       |
|-----|-----|---|---|---|---|-----|-----|--------|---------|----------|----------|-------|--------|---------|-------|-------|
| 225 | 80  | 3 | 5 | 4 | 4 | 500 | 0   | 235206 | 940824  | 47167340 | 3010489  | 57542 | 128056 | 1156691 | 38056 | 56466 |
| 226 | 100 | 2 | 5 | 4 | 4 | 100 | 0   | 232448 | 929792  | 41865115 | 2714422  | 53941 | 139050 | 1016752 | 0     | 55683 |
| 227 | 100 | 2 | 5 | 4 | 4 | 300 | 7.5 | 234027 | 936108  | 46576420 | 20640048 | 57037 | 143960 | 1102897 | 44173 | 59721 |
| 228 | 100 | 3 | 5 | 4 | 4 | 300 | 7.5 | 231889 | 927556  | 44384937 | 19487343 | 56266 | 131947 | 1068359 | 35854 | 60625 |
| 229 | 100 | 1 | 5 | 4 | 4 | 100 | 0   | 247184 | 988736  | 44092227 | 3682387  | 65760 | 136280 | 1064360 | 0     | 55560 |
| 230 | 100 | 1 | 5 | 4 | 4 | 300 | 7.5 | 351112 | 1404448 | 70097151 | 5267690  | 83684 | 197066 | 1693184 | 52711 | 82408 |
| 231 | 100 | 1 | 1 | 4 | 4 | 300 | 0   | 80397  | 321588  | 19641545 | 1916659  | 27060 | 89879  | 384980  | 0     | 22899 |
| 232 | 100 | 1 | 9 | 4 | 4 | 300 | 0   | 244755 | 979020  | 49819957 | 3922797  | 65600 | 142427 | 1184720 | 46387 | 61240 |
| 233 | 100 | 2 | 5 | 4 | 4 | 300 | 0   | 233630 | 934520  | 46391091 | 3545004  | 57659 | 135358 | 1108709 | 33124 | 59090 |
| 234 | 100 | 2 | 5 | 4 | 4 | 300 | 0   | 235407 | 941628  | 45635334 | 3575240  | 56805 | 129678 | 1091128 | 36940 | 54899 |
| 235 | 100 | 2 | 5 | 4 | 4 | 300 | 0   | 233372 | 933488  | 47073976 | 3922802  | 61390 | 141089 | 1114872 | 54387 | 77233 |
| 236 | 100 | 1 | 3 | 3 | 3 | 200 | 2.5 | 317552 | 952656  | 44538187 | 3210860  | 56678 | 128678 | 1060888 | 38341 | 57146 |
| 237 | 100 | 1 | 5 | 4 | 4 | 300 | 0   | 237194 | 948776  | 45929839 | 3048679  | 56187 | 132560 | 1094213 | 40133 | 63133 |
| 238 | 100 | 2 | 3 | 5 | 5 | 200 | 2.5 | 194400 | 972000  | 47953838 | 20763715 | 60123 | 138892 | 1128473 | 39458 | 60320 |
| 239 | 100 | 2 | 7 | 3 | 3 | 200 | 2.5 | 317392 | 952176  | 44398195 | 19578640 | 59220 | 132300 | 1061130 | 39435 | 56235 |
| 240 | 100 | 3 | 3 | 3 | 3 | 200 | 2.5 | 315515 | 946545  | 44334798 | 3011261  | 57612 | 134134 | 1071179 | 33955 | 52030 |
| 241 | 100 | 3 | 7 | 5 | 5 | 200 | 2.5 | 184630 | 923150  | 42634465 | 18800311 | 59925 | 130274 | 1031418 | 40721 | 59950 |
| 242 | 100 | 1 | 5 | 4 | 4 | 300 | 0   | 231662 | 926648  | 45332030 | 19695618 | 56691 | 130804 | 1083654 | 35761 | 52173 |
| 243 | 100 | 1 | 7 | 3 | 3 | 200 | 5   | 333931 | 1001793 | 47233004 | 3409720  | 62970 | 136657 | 1140746 | 40761 | 54821 |

|     |     |   |   |   |   |     |   |        |        |          |          |       |        |         |       |       |
|-----|-----|---|---|---|---|-----|---|--------|--------|----------|----------|-------|--------|---------|-------|-------|
| 244 | 100 | 2 | 3 | 3 | 3 | 200 | 5 | 318713 | 956139 | 44242523 | 29       | 56000 | 131075 | 1059478 | 38791 | 57597 |
| 245 | 100 | 2 | 7 | 5 | 5 | 200 | 5 | 188047 | 940235 | 45616224 | 3595138  | 62955 | 158384 | 1093939 | 39747 | 72955 |
| 246 | 100 | 3 | 3 | 5 | 5 | 200 | 5 | 182378 | 911890 | 41914455 | 2821757  | 56064 | 127772 | 1010693 | 32104 | 50322 |
| 247 | 100 | 3 | 7 | 3 | 3 | 200 | 5 | 321512 | 964536 | 44477722 | 3825431  | 57136 | 138799 | 1057839 | 36362 | 50653 |
| 248 | 100 | 2 | 5 | 4 | 4 | 300 | 0 | 243773 | 975092 | 47494802 | 3560701  | 60323 | 137495 | 1128902 | 35677 | 56714 |
| 249 | 100 | 2 | 1 | 4 | 4 | 300 | 0 | 117616 | 470464 | 26266220 | 11051799 | 33118 | 97539  | 563158  | 19461 | 30342 |
| 250 | 100 | 2 | 9 | 4 | 4 | 300 | 0 | 236592 | 946368 | 48126465 | 21541176 | 62309 | 143557 | 1141315 | 39302 | 59933 |
| 251 | 100 | 3 | 5 | 4 | 4 | 300 | 0 | 238680 | 954720 | 45698119 | 3496066  | 57632 | 134829 | 1098592 | 38197 | 52263 |
| 252 | 100 | 3 | 5 | 4 | 4 | 300 | 0 | 235223 | 940892 | 46313584 | 3216610  | 58587 | 135253 | 1131627 | 35147 | 52907 |
| 253 | 100 | 3 | 5 | 4 | 4 | 300 | 0 | 233107 | 932428 | 44634998 | 19638300 | 57421 | 132355 | 1074539 | 33632 | 54434 |
| 254 | 100 | 3 | 5 | 4 | 4 | 300 | 0 | 249910 | 999640 | 49108212 | 21851375 | 65076 | 145648 | 1192106 | 41528 | 58525 |
| 255 | 100 | 3 | 1 | 4 | 4 | 300 | 0 | 139781 | 559124 | 28604309 | 2033352  | 38086 | 100013 | 634442  | 18970 | 34007 |
| 256 | 100 | 3 | 9 | 4 | 4 | 300 | 0 | 234162 | 936648 | 45578661 | 19996962 | 62941 | 137137 | 1108915 | 40575 | 57922 |
| 257 | 100 | 1 | 5 | 2 | 2 | 300 | 0 | 465459 | 930918 | 44594694 | 2961503  | 53873 | 125960 | 1099418 | 34769 | 53104 |
| 258 | 100 | 1 | 5 | 6 | 6 | 300 | 0 | 156933 | 941598 | 45533965 | 20330809 | 59059 | 126922 | 1072451 | 34176 | 53824 |
| 259 | 100 | 1 | 5 | 4 | 4 | 300 | 0 | 242439 | 969756 | 47151682 | 3152926  | 56468 | 134462 | 1152923 | 44923 | 62328 |
| 260 | 100 | 1 | 5 | 4 | 4 | 300 | 0 | 237807 | 951228 | 47052575 | 3605083  | 57191 | 131144 | 1133632 | 49084 | 56013 |
| 261 | 100 | 2 | 5 | 2 | 2 | 300 | 0 | 469324 | 938648 | 44431981 | 3220737  | 56293 | 129967 | 1088046 | 35303 | 54274 |
| 262 | 100 | 2 | 5 | 6 | 6 | 300 | 0 | 165686 | 994116 | 43981524 | 19279604 | 61010 | 128178 | 1067624 | 43644 | 58871 |

|     |     |   |   |   |   |     |     |        |         |          |          |       |        |         |       |       |
|-----|-----|---|---|---|---|-----|-----|--------|---------|----------|----------|-------|--------|---------|-------|-------|
| 263 | 100 | 1 | 7 | 5 | 5 | 200 | 2.5 | 190753 | 953765  | 46859717 | 3569767  | 61625 | 140850 | 1130000 | 38100 | 58825 |
| 264 | 100 | 1 | 3 | 5 | 5 | 200 | 5   | 199392 | 996960  | 46455489 | 3318464  | 59000 | 133750 | 1098550 | 58175 | 59725 |
| 265 | 100 | 3 | 5 | 2 | 2 | 300 | 0   | 574678 | 1149356 | 55059044 | 3922361  | 68769 | 163291 | 1360247 | 44629 | 66067 |
| 266 | 100 | 3 | 5 | 6 | 6 | 300 | 0   | 153246 | 919476  | 44900486 | 19662598 | 59702 | 130371 | 1081470 | 32682 | 56364 |
| 267 | 100 | 1 | 3 | 5 | 5 | 400 | 2.5 | 187794 | 938970  | 47530751 | 3196559  | 59341 | 139590 | 1152264 | 43756 | 64838 |
| 268 | 100 | 1 | 7 | 3 | 3 | 400 | 2.5 | 328724 | 986172  | 49088322 | 3333485  | 59948 | 136526 | 1208652 | 39881 | 58126 |
| 269 | 100 | 2 | 3 | 3 | 3 | 400 | 2.5 | 306806 | 920418  | 45634001 | 3159279  | 56707 | 126173 | 1109902 | 36271 | 54940 |
| 270 | 100 | 2 | 7 | 5 | 5 | 400 | 2.5 | 197208 | 986040  | 48378880 | 3565922  | 65238 | 141103 | 1166416 | 40689 | 59724 |
| 271 | 100 | 3 | 3 | 5 | 5 | 400 | 2.5 | 181647 | 908235  | 45429300 | 2888567  | 58868 | 129726 | 1100920 | 40933 | 59714 |
| 272 | 100 | 3 | 7 | 3 | 3 | 400 | 2.5 | 315038 | 945114  | 46059194 | 3247299  | 58293 | 135932 | 1132263 | 35150 | 57985 |
| 273 | 100 | 1 | 3 | 3 | 3 | 400 | 5   | 314023 | 942069  | 45904194 | 3316632  | 55455 | 129394 | 1106948 | 37507 | 55842 |
| 274 | 100 | 1 | 7 | 5 | 5 | 400 | 5   | 193504 | 967520  | 49432058 | 3725153  | 58258 | 135714 | 1167293 | 43797 | 61817 |
| 275 | 100 | 2 | 3 | 5 | 5 | 400 | 5   | 187852 | 939260  | 48343586 | 3515169  | 57544 | 133017 | 1169701 | 42905 | 64888 |
| 276 | 100 | 2 | 7 | 3 | 3 | 400 | 5   | 322056 | 966168  | 48130793 | 3475904  | 61975 | 138349 | 1172257 | 38941 | 57646 |
| 277 | 100 | 3 | 3 | 3 | 3 | 400 | 5   | 332537 | 997611  | 49106979 | 3700230  | 62434 | 138841 | 1207824 | 39893 | 61027 |
| 278 | 100 | 3 | 7 | 5 | 5 | 400 | 5   | 172272 | 861360  | 39480962 | 3139395  | 55501 | 133070 | 986441  | 32318 | 47306 |
| 279 | 100 | 2 | 5 | 4 | 4 | 500 | 0   | 232735 | 930940  | 46092695 | 3304591  | 57339 | 128223 | 1119291 | 36143 | 58032 |
| 280 | 100 | 3 | 5 | 4 | 4 | 500 | 0   | 237315 | 949260  | 46524698 | 3217726  | 58829 | 132303 | 1145211 | 38000 | 54127 |

Table 1 continuation

| TP | TM | CO | VT | VA | M   | H   | C14:1 | C15:0  | iso   | C16:0    | iso    | C16:1  | anteiso | C17:0  | C17:1  | C18:0   | C18:1 |
|----|----|----|----|----|-----|-----|-------|--------|-------|----------|--------|--------|---------|--------|--------|---------|-------|
|    |    |    |    |    |     |     |       |        | C16   |          | C17    |        | C17     |        |        |         | 9t    |
| 60 | 1  | 5  | 4  | 4  | 100 | 0   | 0     | 106360 | 0     | 7822040  | 141200 | 378320 | 145440  | 335760 | 178640 | 5379200 | 70320 |
| 60 | 3  | 5  | 4  | 4  | 100 | 0   | 0     | 123683 | 0     | 9619129  | 145465 | 455762 | 160594  | 410495 | 216673 | 6675723 | 87683 |
| 60 | 1  | 3  | 3  | 3  | 200 | 2.5 | 0     | 72075  | 23104 | 5396090  | 103239 | 244209 | 106552  | 220164 | 120776 | 3634627 | 46448 |
| 60 | 1  | 7  | 5  | 5  | 200 | 2.5 | 0     | 106863 | 0     | 8347451  | 144534 | 389216 | 152917  | 344657 | 188333 | 5730000 | 69877 |
| 60 | 2  | 3  | 5  | 5  | 200 | 2.5 | 0     | 108867 | 0     | 8554631  | 142118 | 388300 | 153005  | 352438 | 188695 | 5906158 | 68892 |
| 60 | 3  | 3  | 3  | 3  | 200 | 2.5 | 27161 | 112039 | 22449 | 8625995  | 131137 | 390205 | 146605  | 350473 | 180337 | 5951971 | 74780 |
| 60 | 3  | 7  | 5  | 5  | 200 | 2.5 | 0     | 137075 | 0     | 10665300 | 171125 | 489600 | 184400  | 441775 | 226925 | 7442000 | 95100 |
| 60 | 1  | 3  | 5  | 5  | 200 | 5   | 0     | 81122  | 0     | 6136000  | 106220 | 286927 | 119610  | 257049 | 136000 | 4208634 | 51512 |
| 60 | 1  | 7  | 3  | 3  | 200 | 5   | 18761 | 87176  | 0     | 6857151  | 117659 | 321527 | 120820  | 281561 | 149429 | 4652795 | 59854 |
| 60 | 2  | 7  | 5  | 5  | 200 | 5   | 31269 | 122214 | 0     | 9579279  | 150498 | 442239 | 167886  | 392985 | 209229 | 6648134 | 87065 |
| 60 | 3  | 3  | 5  | 5  | 200 | 5   | 0     | 120735 | 0     | 9524755  | 146887 | 436446 | 183186  | 399240 | 215858 | 6571691 | 78873 |
| 60 | 3  | 7  | 3  | 3  | 200 | 5   | 27790 | 123863 | 24527 | 9886566  | 157522 | 442771 | 180541  | 399029 | 212941 | 6873380 | 87951 |
| 60 | 1  | 5  | 4  | 4  | 300 | 7.5 | 18676 | 79371  | 21592 | 6273793  | 99625  | 280348 | 103037  | 252749 | 141472 | 4293110 | 53110 |
| 60 | 2  | 5  | 4  | 4  | 300 | 7.5 | 24647 | 109017 | 20634 | 8749122  | 137175 | 386178 | 148739  | 350772 | 189518 | 6088092 | 75366 |
| 60 | 3  | 5  | 4  | 4  | 300 | 7.5 | 26724 | 123618 | 24895 | 9967132  | 157382 | 439803 | 186803  | 398974 | 210026 | 6951355 | 95645 |
| 60 | 1  | 5  | 4  | 4  | 300 | 0   | 20226 | 94365  | 21515 | 7289635  | 118618 | 328080 | 132372  | 296120 | 162512 | 4987522 | 63056 |
| 60 | 1  | 5  | 4  | 4  | 300 | 0   | 19147 | 86493  | 23027 | 6903973  | 114107 | 309667 | 117573  | 278747 | 154827 | 4728013 | 61587 |
| 60 | 1  | 5  | 4  | 4  | 300 | 0   | 23303 | 86855  | 20289 | 6936000  | 111895 | 310105 | 116316  | 279408 | 154421 | 4756645 | 66697 |
| 60 | 1  | 5  | 4  | 4  | 300 | 0   | 18475 | 89431  | 21779 | 6867612  | 114355 | 310676 | 125726  | 277819 | 155518 | 4707946 | 54221 |
| 60 | 1  | 1  | 4  | 4  | 300 | 0   | 0     | 55010  | 20066 | 4373109  | 74086  | 189690 | 77914   | 179987 | 102640 | 2978548 | 37927 |
| 60 | 1  | 9  | 4  | 4  | 300 | 0   | 0     | 63087  | 25329 | 4904336  | 83933  | 238913 | 83463   | 201342 | 127128 | 3288349 | 38013 |
| 60 | 1  | 5  | 2  | 2  | 300 | 0   | 11658 | 54168  | 19322 | 4393651  | 73188  | 193282 | 80973   | 174248 | 100383 | 2970953 | 35711 |
| 60 | 1  | 5  | 6  | 6  | 300 | 0   | 0     | 97822  | 0     | 7539941  | 125267 | 348851 | 137248  | 312436 | 170733 | 5198119 | 64554 |
| 60 | 2  | 5  | 4  | 4  | 300 | 0   | 28161 | 117987 | 17732 | 9418000  | 154685 | 425839 | 158081  | 380000 | 205718 | 6523195 | 77450 |
| 60 | 2  | 5  | 4  | 4  | 300 | 0   | 27314 | 120040 | 27696 | 9606284  | 157096 | 428977 | 175287  | 382772 | 205175 | 6664594 | 80211 |



|    |   |   |   |   |     |     |       |        |       |          |        |        |        |        |        |         |       |
|----|---|---|---|---|-----|-----|-------|--------|-------|----------|--------|--------|--------|--------|--------|---------|-------|
| 60 | 2 | 5 | 4 | 4 | 300 | 0   | 26361 | 120052 | 24197 | 9267882  | 143541 | 416459 | 164315 | 371685 | 195830 | 6418007 | 84511 |
| 60 | 2 | 1 | 4 | 4 | 300 | 0   | 24915 | 88654  | 19582 | 7036026  | 115255 | 315438 | 122301 | 281961 | 152118 | 4822092 | 56680 |
| 60 | 2 | 9 | 4 | 4 | 300 | 0   | 20354 | 88157  | 21154 | 6986177  | 115030 | 319633 | 121652 | 280748 | 162951 | 4760800 | 55318 |
| 60 | 2 | 5 | 6 | 6 | 300 | 0   | 27632 | 123257 | 0     | 9848309  | 153671 | 445638 | 163243 | 422092 | 221211 | 6816711 | 80586 |
| 60 | 3 | 5 | 4 | 4 | 300 | 0   | 29325 | 133272 | 26203 | 10385443 | 170649 | 468656 | 197810 | 417757 | 224498 | 7262361 | 89036 |
| 60 | 3 | 5 | 4 | 4 | 300 | 0   | 29067 | 127320 | 26293 | 10094893 | 154507 | 454107 | 193320 | 402413 | 212800 | 6983773 | 81627 |
| 60 | 3 | 5 | 4 | 4 | 300 | 0   | 28174 | 126013 | 20604 | 9978322  | 151275 | 440309 | 179611 | 395329 | 217342 | 6957248 | 83087 |
| 60 | 3 | 5 | 4 | 4 | 300 | 0   | 33342 | 126376 | 31987 | 10212134 | 157128 | 461691 | 184859 | 407530 | 217691 | 7102443 | 94201 |
| 60 | 3 | 1 | 4 | 4 | 300 | 0   | 23086 | 103325 | 23483 | 8315430  | 132199 | 369007 | 148464 | 332517 | 177391 | 5731722 | 65258 |
| 60 | 3 | 9 | 4 | 4 | 300 | 0   | 25450 | 111369 | 31960 | 8908832  | 142054 | 399289 | 155839 | 354309 | 193342 | 6177557 | 75369 |
| 60 | 3 | 5 | 2 | 2 | 300 | 0   | 25638 | 105463 | 23537 | 8530758  | 133926 | 375738 | 152624 | 335852 | 180342 | 5919356 | 73067 |
| 60 | 3 | 5 | 6 | 6 | 300 | 0   | 29467 | 138020 | 0     | 11043789 | 169342 | 490934 | 175875 | 456711 | 231553 | 7674039 | 98467 |
| 60 | 1 | 3 | 5 | 5 | 400 | 2.5 | 0     | 65000  | 23816 | 5113753  | 87065  | 223741 | 94093  | 209433 | 117128 | 3496398 | 44761 |
| 60 | 1 | 7 | 3 | 3 | 400 | 2.5 | 15119 | 64515  | 20406 | 5245552  | 86309  | 232975 | 91604  | 205374 | 122101 | 3554079 | 39876 |
| 60 | 2 | 3 | 3 | 3 | 400 | 2.5 | 13319 | 62541  | 20437 | 5081874  | 82970  | 222600 | 92519  | 205978 | 116800 | 3460274 | 38837 |
| 60 | 3 | 3 | 5 | 5 | 400 | 2.5 | 26858 | 112805 | 22818 | 8721870  | 137406 | 388005 | 150461 | 351933 | 185923 | 6015499 | 80125 |
| 60 | 3 | 7 | 3 | 3 | 400 | 2.5 | 26752 | 116654 | 23023 | 9563827  | 148045 | 422015 | 169143 | 377820 | 201549 | 6683038 | 78805 |
| 60 | 1 | 3 | 3 | 3 | 400 | 5   | 0     | 38341  | 21242 | 3016174  | 56091  | 129508 | 49356  | 120856 | 71492  | 1995492 | 24386 |
| 60 | 1 | 7 | 5 | 5 | 400 | 5   | 19799 | 89636  | 21822 | 7157399  | 115075 | 320829 | 129472 | 286922 | 159761 | 4899246 | 58819 |
| 60 | 2 | 3 | 5 | 5 | 400 | 5   | 19621 | 86869  | 21439 | 7077588  | 118371 | 316629 | 137083 | 282462 | 162109 | 4854419 | 58131 |
| 60 | 2 | 7 | 3 | 3 | 400 | 5   | 20087 | 91212  | 22309 | 7364155  | 117756 | 333905 | 121825 | 292362 | 163279 | 5059953 | 56431 |
| 60 | 3 | 3 | 3 | 3 | 400 | 5   | 16615 | 73348  | 19570 | 6026896  | 97822  | 262007 | 109119 | 239400 | 132281 | 4140030 | 49578 |
| 60 | 3 | 7 | 5 | 5 | 400 | 5   | 30126 | 129497 | 21269 | 10516256 | 171319 | 474146 | 178480 | 435138 | 222776 | 7384347 | 95704 |
| 60 | 1 | 5 | 4 | 4 | 500 | 0   | 16633 | 74461  | 21932 | 6026597  | 100721 | 268938 | 109050 | 243663 | 136393 | 4136770 | 46541 |
| 60 | 2 | 5 | 4 | 4 | 500 | 0   | 23197 | 105205 | 20120 | 8544185  | 133952 | 383149 | 150169 | 341904 | 181574 | 5944827 | 66675 |
| 60 | 3 | 5 | 4 | 4 | 500 | 0   | 34733 | 134108 | 30244 | 10778934 | 158741 | 470549 | 172954 | 420954 | 225587 | 7512609 | 91142 |
| 70 | 1 | 5 | 4 | 4 | 100 | 0   | 0     | 119612 | 0     | 9135689  | 111184 | 424388 | 152466 | 389748 | 208816 | 6386019 | 83495 |
| 70 | 1 | 3 | 5 | 5 | 200 | 2.5 | 0     | 110025 | 37525 | 8581500  | 102300 | 394275 | 154050 | 354375 | 190200 | 5916825 | 75650 |
| 70 | 1 | 7 | 5 | 5 | 200 | 5   | 31616 | 124268 | 43485 | 9756818  | 114571 | 444369 | 175354 | 400126 | 215631 | 6785126 | 84545 |

|    |   |   |   |   |     |     |       |        |       |          |        |        |        |        |        |         |       |
|----|---|---|---|---|-----|-----|-------|--------|-------|----------|--------|--------|--------|--------|--------|---------|-------|
| 70 | 2 | 5 | 2 | 2 | 300 | 0   | 26772 | 119472 | 41294 | 9679941  | 111327 | 429234 | 175512 | 384733 | 200990 | 6821413 | 80700 |
| 70 | 1 | 5 | 4 | 4 | 300 | 7.5 | 23933 | 101745 | 34591 | 8151436  | 94899  | 363101 | 159987 | 329960 | 176698 | 5637423 | 67034 |
| 70 | 1 | 7 | 3 | 3 | 200 | 2.5 | 28568 | 117467 | 41095 | 9386804  | 108060 | 423045 | 177859 | 376568 | 203397 | 6499628 | 80533 |
| 70 | 2 | 3 | 3 | 3 | 200 | 2.5 | 27912 | 119176 | 40853 | 9541162  | 110221 | 425265 | 174956 | 382544 | 201971 | 6658044 | 81368 |
| 70 | 2 | 7 | 5 | 5 | 200 | 2.5 | 32675 | 136925 | 50250 | 10769675 | 124925 | 483675 | 195200 | 442325 | 233750 | 7566750 | 97075 |
| 70 | 3 | 7 | 3 | 3 | 200 | 2.5 | 29925 | 130254 | 47224 | 10478418 | 119776 | 464970 | 188776 | 421045 | 221403 | 7398597 | 91179 |
| 70 | 1 | 3 | 3 | 3 | 200 | 5   | 20367 | 86307  | 28417 | 6934598  | 82251  | 311261 | 130070 | 280402 | 156241 | 4781382 | 59111 |
| 70 | 1 | 5 | 4 | 4 | 300 | 0   | 26462 | 115398 | 39010 | 9141378  | 105338 | 407505 | 154662 | 365137 | 194234 | 6360950 | 78100 |
| 70 | 2 | 3 | 5 | 5 | 200 | 5   | 31915 | 127264 | 45547 | 10173806 | 120124 | 464502 | 181194 | 419030 | 220995 | 7078209 | 82836 |
| 70 | 2 | 7 | 3 | 3 | 200 | 5   | 31379 | 131030 | 46803 | 10626455 | 120879 | 476197 | 180030 | 427439 | 225000 | 7465985 | 91545 |
| 70 | 3 | 3 | 3 | 3 | 200 | 5   | 28856 | 125376 | 42460 | 9949604  | 114401 | 451782 | 167376 | 399000 | 210446 | 6956139 | 86064 |
| 70 | 3 | 5 | 2 | 2 | 300 | 0   | 28530 | 123711 | 43537 | 10003651 | 114893 | 445826 | 172913 | 395819 | 206483 | 7078148 | 87242 |
| 70 | 3 | 3 | 5 | 5 | 200 | 2.5 | 0     | 126616 | 43409 | 9910278  | 118308 | 462904 | 176364 | 408889 | 216540 | 6887146 | 88737 |
| 70 | 3 | 7 | 5 | 5 | 200 | 5   | 33100 | 136550 | 47700 | 10766475 | 126200 | 492600 | 191500 | 439050 | 230675 | 7531425 | 97325 |
| 70 | 1 | 5 | 4 | 4 | 300 | 0   | 26747 | 113480 | 40053 | 9150520  | 104747 | 408413 | 171640 | 364907 | 194893 | 6361307 | 77440 |
| 70 | 2 | 5 | 4 | 4 | 100 | 0   | 0     | 128431 | 0     | 9597137  | 115412 | 449020 | 177882 | 407333 | 213098 | 6698706 | 91137 |
| 70 | 3 | 5 | 4 | 4 | 100 | 0   | 0     | 131269 | 48692 | 9736154  | 119846 | 462038 | 180692 | 415577 | 216077 | 6918692 | 85962 |
| 70 | 1 | 5 | 2 | 2 | 300 | 0   | 17848 | 79413  | 27162 | 6516964  | 74205  | 289050 | 113010 | 256040 | 141974 | 4502106 | 54944 |
| 70 | 1 | 5 | 6 | 6 | 300 | 0   | 28579 | 125783 | 44467 | 9891928  | 113941 | 442599 | 172875 | 403421 | 213079 | 6890625 | 87671 |
| 70 | 1 | 5 | 4 | 4 | 300 | 0   | 26033 | 116380 | 40092 | 9298570  | 109744 | 406911 | 163161 | 374859 | 198072 | 6463449 | 75987 |
| 70 | 1 | 5 | 4 | 4 | 300 | 0   | 27037 | 117712 | 40575 | 9476361  | 107906 | 418943 | 182930 | 378569 | 202435 | 6590783 | 79906 |
| 70 | 1 | 7 | 5 | 5 | 400 | 2.5 | 28913 | 125200 | 44813 | 10199250 | 116400 | 449938 | 178463 | 406688 | 215975 | 7154288 | 81038 |
| 70 | 1 | 3 | 5 | 5 | 400 | 5   | 19454 | 87928  | 30136 | 7097916  | 83387  | 313164 | 134814 | 284355 | 155335 | 4898697 | 61625 |
| 70 | 1 | 1 | 4 | 4 | 300 | 0   | 0     | 0      | 0     | 1105409  | 22339  | 51136  | 17116  | 47083  | 27787  | 686365  | 0     |
| 70 | 1 | 9 | 4 | 4 | 300 | 0   | 24640 | 111427 | 39920 | 8884467  | 102587 | 403120 | 154853 | 355707 | 194800 | 6161813 | 68120 |
| 70 | 2 | 5 | 4 | 4 | 300 | 7.5 | 30046 | 124892 | 43725 | 10128118 | 115423 | 453377 | 173692 | 404157 | 214046 | 7074138 | 81954 |
| 70 | 3 | 5 | 4 | 4 | 300 | 7.5 | 30733 | 129254 | 45545 | 10513122 | 119102 | 475116 | 174257 | 419248 | 223894 | 7384251 | 85637 |
| 70 | 2 | 5 | 4 | 4 | 300 | 0   | 29528 | 125688 | 45369 | 10176611 | 116120 | 455163 | 176292 | 408784 | 217050 | 7131774 | 87814 |
| 70 | 2 | 5 | 4 | 4 | 300 | 0   | 29333 | 129693 | 45253 | 10495493 | 118880 | 464200 | 183627 | 420373 | 221160 | 7363773 | 89147 |

|    |   |   |   |   |     |     |       |        |       |          |        |        |        |        |        |         |        |
|----|---|---|---|---|-----|-----|-------|--------|-------|----------|--------|--------|--------|--------|--------|---------|--------|
| 70 | 2 | 5 | 4 | 4 | 300 | 0   | 30954 | 127854 | 44490 | 10332040 | 121205 | 456755 | 201113 | 411947 | 218781 | 7228821 | 89351  |
| 70 | 2 | 5 | 4 | 4 | 300 | 0   | 30199 | 130649 | 46159 | 10608967 | 120146 | 467245 | 186252 | 423245 | 225947 | 7438967 | 89748  |
| 70 | 2 | 1 | 4 | 4 | 300 | 0   | 0     | 20053  | 0     | 1459208  | 18904  | 66997  | 22878  | 61848  | 42944  | 926799  | 0      |
| 70 | 2 | 9 | 4 | 4 | 300 | 0   | 30026 | 127603 | 44411 | 10357589 | 117682 | 458636 | 180305 | 415695 | 220053 | 7298199 | 88384  |
| 70 | 3 | 5 | 4 | 4 | 300 | 0   | 29603 | 127444 | 46556 | 10377377 | 118159 | 460583 | 178543 | 414795 | 219020 | 7289523 | 91775  |
| 70 | 3 | 5 | 4 | 4 | 300 | 0   | 30544 | 132616 | 48734 | 10663698 | 123934 | 474820 | 179711 | 424734 | 225862 | 7517731 | 86925  |
| 70 | 1 | 3 | 3 | 3 | 400 | 2.5 | 12720 | 59153  | 19181 | 4796629  | 56124  | 205864 | 88931  | 191027 | 108498 | 3267876 | 39208  |
| 70 | 1 | 5 | 4 | 4 | 500 | 0   | 22317 | 98028  | 33331 | 7947663  | 90501  | 348016 | 145074 | 316289 | 169643 | 5522862 | 65611  |
| 70 | 2 | 3 | 5 | 5 | 400 | 2.5 | 27010 | 122261 | 43957 | 9917563  | 113229 | 433631 | 170917 | 398656 | 208794 | 6977525 | 80302  |
| 70 | 2 | 7 | 3 | 3 | 400 | 2.5 | 28107 | 122776 | 44229 | 10016791 | 111314 | 443237 | 178167 | 398379 | 208534 | 7092688 | 77020  |
| 70 | 3 | 3 | 3 | 3 | 400 | 2.5 | 24075 | 105246 | 36716 | 8563933  | 96149  | 379896 | 139164 | 336896 | 179015 | 5977463 | 70828  |
| 70 | 3 | 7 | 5 | 5 | 400 | 2.5 | 32196 | 135819 | 50608 | 11146799 | 126464 | 490645 | 191303 | 445422 | 232419 | 7903313 | 95695  |
| 70 | 1 | 7 | 3 | 3 | 400 | 5   | 21292 | 97010  | 33082 | 7838618  | 88923  | 344200 | 145586 | 308319 | 169145 | 5437691 | 65978  |
| 70 | 2 | 3 | 3 | 3 | 400 | 5   | 18299 | 85840  | 29027 | 6936569  | 79728  | 304272 | 121601 | 274302 | 149431 | 4825070 | 57030  |
| 70 | 2 | 7 | 5 | 5 | 400 | 5   | 30373 | 136468 | 48532 | 11005634 | 125348 | 485062 | 191803 | 440373 | 230224 | 7785659 | 90211  |
| 70 | 3 | 3 | 5 | 5 | 400 | 5   | 29350 | 125700 | 43325 | 10164875 | 114125 | 453275 | 170563 | 404488 | 213600 | 7096250 | 86025  |
| 70 | 3 | 7 | 3 | 3 | 400 | 5   | 29291 | 128328 | 46799 | 10541716 | 116806 | 465769 | 175373 | 416433 | 218940 | 7469806 | 85903  |
| 70 | 3 | 5 | 4 | 4 | 300 | 0   | 30631 | 128425 | 46100 | 10452412 | 118299 | 469342 | 176678 | 416983 | 219096 | 7349542 | 90272  |
| 70 | 3 | 5 | 4 | 4 | 300 | 0   | 30980 | 134768 | 49616 | 10854185 | 123603 | 482437 | 185073 | 435497 | 228384 | 7661722 | 88543  |
| 70 | 3 | 9 | 4 | 4 | 300 | 0   | 33453 | 145573 | 53760 | 11846920 | 134147 | 521960 | 213747 | 472973 | 248227 | 8374253 | 100693 |
| 70 | 2 | 5 | 4 | 4 | 500 | 0   | 28952 | 125736 | 44864 | 10365448 | 116104 | 462200 | 181384 | 411256 | 216048 | 7305624 | 88488  |
| 70 | 3 | 1 | 4 | 4 | 300 | 0   | 0     | 26671  | 0     | 2079275  | 27597  | 93302  | 34094  | 88268  | 56805  | 1355356 | 18913  |
| 70 | 3 | 5 | 4 | 4 | 500 | 0   | 29451 | 128000 | 46605 | 10581315 | 118669 | 468297 | 189547 | 419471 | 218485 | 7498333 | 92689  |
| 70 | 2 | 5 | 6 | 6 | 300 | 0   | 30098 | 130092 | 47036 | 10371816 | 120315 | 464715 | 181948 | 421652 | 220997 | 7273515 | 92066  |
| 70 | 3 | 5 | 6 | 6 | 300 | 0   | 31574 | 138059 | 49889 | 10980354 | 131134 | 483836 | 193613 | 446577 | 231148 | 7736144 | 98341  |
| 80 | 2 | 5 | 4 | 4 | 100 | 0   | 0     | 137800 | 0     | 10217920 | 130520 | 467600 | 176360 | 429800 | 203080 | 7160600 | 92560  |
| 80 | 2 | 5 | 4 | 4 | 100 | 0   | 0     | 129880 | 0     | 9754120  | 111480 | 162760 | 0      | 418000 | 225560 | 6849480 | 86400  |
| 80 | 3 | 5 | 4 | 4 | 100 | 0   | 0     | 145087 | 50563 | 11027029 | 138019 | 531534 | 210641 | 477553 | 247301 | 7827961 | 102058 |
| 80 | 3 | 5 | 4 | 4 | 100 | 0   | 0     | 139840 | 0     | 10535640 | 123840 | 485680 | 185240 | 445720 | 231560 | 7411800 | 97800  |

|    |   |   |   |   |     |     |       |        |       |          |        |        |        |        |        |          |        |
|----|---|---|---|---|-----|-----|-------|--------|-------|----------|--------|--------|--------|--------|--------|----------|--------|
| 80 | 1 | 5 | 4 | 4 | 100 | 0   | 0     | 125240 | 0     | 9676440  | 113080 | 445560 | 155960 | 416360 | 216480 | 6732080  | 93760  |
| 80 | 1 | 5 | 4 | 4 | 100 | 0   | 0     | 143569 | 65608 | 10035686 | 110000 | 453686 | 158627 | 418784 | 216549 | 6960824  | 91725  |
| 80 | 1 | 5 | 4 | 4 | 300 | 7.5 | 31776 | 125618 | 50368 | 10190526 | 115632 | 447618 | 169118 | 406526 | 213342 | 7133829  | 85776  |
| 80 | 2 | 5 | 4 | 4 | 300 | 7.5 | 30933 | 134267 | 52000 | 10919440 | 127320 | 474360 | 201027 | 439813 | 225560 | 7732560  | 91520  |
| 80 | 1 | 3 | 3 | 3 | 200 | 2.5 | 26910 | 115749 | 41095 | 9375844  | 107126 | 412658 | 165980 | 376040 | 200970 | 6522045  | 83020  |
| 80 | 1 | 5 | 4 | 4 | 300 | 7.5 | 28317 | 127894 | 44541 | 10077980 | 114389 | 451459 | 180581 | 402178 | 209373 | 7049254  | 87564  |
| 80 | 1 | 7 | 5 | 5 | 200 | 2.5 | 36460 | 140545 | 50916 | 10962054 | 131139 | 503391 | 185198 | 457748 | 244678 | 7657376  | 95446  |
| 80 | 1 | 7 | 3 | 3 | 200 | 2.5 | 32897 | 135739 | 46951 | 10869680 | 123325 | 489635 | 182645 | 434202 | 224837 | 7634379  | 88448  |
| 80 | 2 | 3 | 5 | 5 | 200 | 2.5 | 0     | 129225 | 43125 | 10320525 | 121050 | 473675 | 183875 | 430850 | 217500 | 7228975  | 82850  |
| 80 | 2 | 7 | 3 | 3 | 200 | 2.5 | 31553 | 132045 | 48784 | 10498990 | 119397 | 469945 | 183739 | 428487 | 227261 | 7424337  | 93000  |
| 80 | 2 | 3 | 3 | 3 | 200 | 2.5 | 30090 | 125313 | 43687 | 10187537 | 117821 | 462239 | 191806 | 403493 | 214776 | 7082955  | 84194  |
| 80 | 2 | 7 | 5 | 5 | 200 | 2.5 | 31368 | 137065 | 52488 | 10559900 | 128433 | 484254 | 192214 | 437637 | 228607 | 7399453  | 87164  |
| 80 | 3 | 3 | 3 | 3 | 200 | 2.5 | 28838 | 130471 | 50132 | 10615294 | 121500 | 467235 | 208191 | 423132 | 223926 | 7477279  | 100015 |
| 80 | 3 | 7 | 5 | 5 | 200 | 2.5 | 36450 | 142375 | 55875 | 11132700 | 130800 | 530025 | 211125 | 470700 | 247075 | 7861575  | 105050 |
| 80 | 3 | 3 | 5 | 5 | 200 | 2.5 | 33687 | 141212 | 49470 | 10731061 | 126439 | 496389 | 193914 | 452197 | 236465 | 7581641  | 102626 |
| 80 | 3 | 7 | 3 | 3 | 200 | 2.5 | 36701 | 144716 | 49537 | 11433910 | 133313 | 522866 | 205642 | 469701 | 245045 | 8144970  | 97761  |
| 80 | 1 | 3 | 5 | 5 | 200 | 2.5 | 48621 | 191429 | 75739 | 15876946 | 179039 | 709360 | 265345 | 633719 | 336305 | 11018374 | 128941 |
| 80 | 1 | 7 | 3 | 3 | 200 | 5   | 31351 | 134391 | 45698 | 10501663 | 125970 | 490485 | 184604 | 439262 | 232990 | 7471931  | 90327  |
| 80 | 1 | 3 | 3 | 3 | 200 | 5   | 28123 | 117340 | 38734 | 9463626  | 105798 | 422601 | 158704 | 377158 | 197350 | 6568300  | 78709  |
| 80 | 1 | 3 | 5 | 5 | 200 | 5   | 31658 | 131757 | 48267 | 10035297 | 118391 | 473985 | 183787 | 420891 | 226757 | 7025520  | 89356  |
| 80 | 2 | 3 | 3 | 3 | 200 | 5   | 31806 | 127478 | 46940 | 10452254 | 118567 | 467493 | 178925 | 415821 | 217597 | 7301030  | 90522  |
| 80 | 2 | 7 | 5 | 5 | 200 | 5   | 32915 | 133719 | 52010 | 10375025 | 121055 | 478769 | 188317 | 426608 | 227136 | 7268467  | 89497  |
| 80 | 2 | 3 | 5 | 5 | 200 | 5   | 0     | 134827 | 44356 | 10604183 | 118713 | 474307 | 192995 | 434554 | 226584 | 7432475  | 92475  |
| 80 | 2 | 7 | 3 | 3 | 200 | 5   | 30761 | 126343 | 46866 | 10424925 | 117045 | 462000 | 183776 | 418299 | 219642 | 7330194  | 86224  |
| 80 | 3 | 3 | 5 | 5 | 200 | 5   | 33756 | 132313 | 46095 | 10630920 | 123930 | 487239 | 188035 | 432114 | 231791 | 7427562  | 93060  |
| 80 | 3 | 7 | 3 | 3 | 200 | 5   | 32487 | 133839 | 44322 | 11031121 | 125322 | 486271 | 210829 | 438965 | 229975 | 7778231  | 101744 |
| 80 | 3 | 3 | 3 | 3 | 200 | 5   | 31590 | 136890 | 50820 | 11006895 | 128100 | 497700 | 195435 | 451245 | 234465 | 7806600  | 100635 |
| 80 | 3 | 7 | 5 | 5 | 200 | 5   | 52063 | 207549 | 84272 | 17399587 | 193155 | 761262 | 294782 | 686578 | 355049 | 12237961 | 157354 |
| 80 | 2 | 5 | 4 | 4 | 300 | 7.5 | 32227 | 140387 | 48813 | 11101133 | 130507 | 484507 | 199667 | 455093 | 232840 | 7927853  | 97453  |

|    |   |   |   |   |     |     |       |        |       |          |        |        |        |        |        |          |        |
|----|---|---|---|---|-----|-----|-------|--------|-------|----------|--------|--------|--------|--------|--------|----------|--------|
| 80 | 3 | 5 | 4 | 4 | 300 | 7.5 | 32228 | 122148 | 44456 | 10233450 | 115423 | 455826 | 189705 | 404107 | 209597 | 7209154  | 87919  |
| 80 | 3 | 5 | 4 | 4 | 300 | 7.5 | 33076 | 125143 | 45621 | 10505967 | 116904 | 456199 | 176917 | 410419 | 207136 | 7348359  | 90392  |
| 80 | 1 | 7 | 5 | 5 | 200 | 5   | 31955 | 135941 | 55074 | 10706881 | 131510 | 490074 | 199134 | 447030 | 225990 | 7493639  | 91807  |
| 80 | 1 | 5 | 4 | 4 | 300 | 0   | 39826 | 175318 | 65191 | 14184254 | 157793 | 621726 | 232870 | 564990 | 293391 | 10002261 | 117860 |
| 80 | 1 | 5 | 4 | 4 | 300 | 0   | 31474 | 128197 | 45724 | 10340974 | 117579 | 465697 | 178224 | 412197 | 216276 | 7232303  | 92408  |
| 80 | 1 | 5 | 4 | 4 | 300 | 0   | 31894 | 133690 | 49386 | 10509571 | 120185 | 463617 | 195406 | 423472 | 221716 | 7373861  | 92766  |
| 80 | 1 | 1 | 4 | 4 | 300 | 0   | 0     | 23721  | 0     | 1846179  | 21382  | 83668  | 29914  | 80465  | 50631  | 1197940  | 0      |
| 80 | 1 | 9 | 4 | 4 | 300 | 0   | 35505 | 148147 | 59920 | 12487893 | 139090 | 539264 | 209445 | 499612 | 260094 | 9037017  | 115077 |
| 80 | 1 | 5 | 4 | 4 | 300 | 0   | 30827 | 132600 | 40800 | 10510667 | 118960 | 463973 | 179080 | 420053 | 217453 | 7380840  | 90293  |
| 80 | 1 | 5 | 4 | 4 | 300 | 0   | 30039 | 130553 | 45539 | 10527684 | 117487 | 472566 | 175039 | 417763 | 220013 | 7373118  | 94316  |
| 80 | 1 | 5 | 4 | 4 | 300 | 0   | 32684 | 137711 | 50487 | 11186618 | 126974 | 495961 | 202250 | 448987 | 233408 | 7871684  | 96039  |
| 80 | 1 | 5 | 2 | 2 | 300 | 0   | 26540 | 109213 | 36393 | 8760273  | 98793  | 386953 | 156540 | 348200 | 183587 | 6112593  | 70927  |
| 80 | 1 | 5 | 6 | 6 | 300 | 0   | 27600 | 140820 | 49580 | 10772260 | 123660 | 484660 | 179800 | 438660 | 228340 | 7543820  | 95800  |
| 80 | 1 | 5 | 4 | 4 | 300 | 0   | 17160 | 76520  | 24320 | 6120707  | 104827 | 107507 | 0      | 243813 | 31853  | 4201613  | 56400  |
| 80 | 1 | 5 | 4 | 4 | 300 | 0   | 17187 | 72827  | 26480 | 6079680  | 73000  | 269733 | 102320 | 249627 | 138840 | 4188613  | 47093  |
| 80 | 1 | 1 | 4 | 4 | 300 | 0   | 0     | 23987  | 0     | 1738392  | 20811  | 74299  | 25037  | 80213  | 38060  | 1120532  | 0      |
| 80 | 1 | 9 | 4 | 4 | 300 | 0   | 35046 | 137268 | 50941 | 11258876 | 130327 | 497255 | 194993 | 450758 | 232196 | 7976183  | 96235  |
| 80 | 2 | 5 | 4 | 4 | 300 | 0   | 30583 | 136344 | 51444 | 10760728 | 120066 | 470583 | 214424 | 429113 | 221166 | 7587497  | 88702  |
| 80 | 2 | 5 | 4 | 4 | 300 | 0   | 32482 | 140575 | 51144 | 10962876 | 128361 | 512843 | 191813 | 453512 | 239278 | 7789793  | 92763  |
| 80 | 2 | 5 | 4 | 4 | 300 | 0   | 31053 | 130440 | 49880 | 10648787 | 120507 | 469467 | 183867 | 425640 | 225293 | 7502493  | 91920  |
| 80 | 1 | 5 | 2 | 2 | 300 | 0   | 23776 | 107155 | 37149 | 8777644  | 99875  | 385591 | 152178 | 346528 | 182515 | 6166515  | 72013  |
| 80 | 1 | 5 | 6 | 6 | 300 | 0   | 30866 | 130230 | 41508 | 10387436 | 120866 | 471895 | 196957 | 422144 | 215843 | 7248866  | 93030  |
| 80 | 2 | 5 | 4 | 4 | 300 | 0   | 31947 | 133316 | 53250 | 10900697 | 122539 | 488921 | 188092 | 436000 | 230013 | 7686961  | 94987  |
| 80 | 2 | 1 | 4 | 4 | 300 | 0   | 0     | 37714  | 0     | 2982379  | 35522  | 134206 | 44837  | 122764 | 78472  | 1968159  | 31203  |
| 80 | 2 | 9 | 4 | 4 | 300 | 0   | 33927 | 134693 | 56026 | 11133122 | 128330 | 480911 | 191287 | 446785 | 225254 | 7888224  | 86244  |
| 80 | 2 | 5 | 4 | 4 | 300 | 0   | 31046 | 122157 | 44915 | 10336379 | 114105 | 452261 | 174680 | 410967 | 212092 | 7262026  | 92144  |
| 80 | 2 | 5 | 4 | 4 | 300 | 0   | 30940 | 126305 | 44954 | 10348874 | 116940 | 455470 | 183139 | 407695 | 217510 | 7281046  | 85020  |
| 80 | 2 | 5 | 4 | 4 | 300 | 0   | 31813 | 128800 | 47373 | 10603813 | 117680 | 466973 | 182000 | 415440 | 216800 | 7455453  | 87760  |
| 80 | 2 | 5 | 2 | 2 | 300 | 0   | 29465 | 118247 | 42147 | 9931686  | 108441 | 430856 | 176087 | 382107 | 198689 | 7000957  | 84522  |

|    |   |   |   |   |     |     |       |        |       |          |        |        |        |        |        |         |        |
|----|---|---|---|---|-----|-----|-------|--------|-------|----------|--------|--------|--------|--------|--------|---------|--------|
| 80 | 2 | 5 | 6 | 6 | 300 | 0   | 32528 | 133706 | 47197 | 10502528 | 123813 | 472033 | 182829 | 429291 | 222000 | 7363866 | 86167  |
| 80 | 2 | 5 | 4 | 4 | 300 | 0   | 29154 | 129973 | 50805 | 10850255 | 124779 | 476805 | 181436 | 426537 | 216268 | 7633154 | 91691  |
| 80 | 2 | 1 | 4 | 4 | 300 | 0   | 0     | 36387  | 0     | 2917413  | 40120  | 141867 | 52627  | 126173 | 74013  | 1936667 | 29973  |
| 80 | 2 | 9 | 4 | 4 | 300 | 0   | 31161 | 134085 | 53810 | 11080892 | 124498 | 484485 | 187764 | 444026 | 230374 | 7845652 | 94990  |
| 80 | 3 | 5 | 4 | 4 | 300 | 0   | 34242 | 123517 | 46617 | 10388282 | 115772 | 462376 | 179879 | 411919 | 215168 | 7275570 | 84161  |
| 80 | 3 | 5 | 4 | 4 | 300 | 0   | 32316 | 127737 | 57579 | 10566145 | 117500 | 456145 | 175224 | 409645 | 215211 | 7438447 | 90592  |
| 80 | 3 | 5 | 4 | 4 | 300 | 0   | 27974 | 124490 | 45642 | 10294636 | 112013 | 447099 | 185258 | 403563 | 208848 | 7237801 | 91046  |
| 80 | 2 | 5 | 2 | 2 | 300 | 0   | 27818 | 120640 | 43407 | 10037057 | 110505 | 442263 | 197697 | 405071 | 202519 | 7074761 | 90485  |
| 80 | 2 | 5 | 6 | 6 | 300 | 0   | 40872 | 157067 | 49933 | 12424027 | 143154 | 550792 | 214651 | 495040 | 253087 | 8717376 | 101758 |
| 80 | 3 | 5 | 4 | 4 | 300 | 0   | 33947 | 129240 | 45987 | 10575427 | 118373 | 460027 | 179147 | 415773 | 217800 | 7452067 | 100360 |
| 80 | 3 | 1 | 4 | 4 | 300 | 0   | 0     | 51371  | 17525 | 3897217  | 47679  | 171946 | 63452  | 163559 | 88789  | 2618127 | 39973  |
| 80 | 3 | 9 | 4 | 4 | 300 | 0   | 31141 | 126497 | 50510 | 10662993 | 119181 | 474604 | 177906 | 422577 | 219839 | 7541718 | 106980 |
| 80 | 3 | 5 | 4 | 4 | 300 | 0   | 29797 | 125233 | 44708 | 10408210 | 121902 | 469390 | 186505 | 424944 | 216144 | 7329626 | 85456  |
| 80 | 3 | 5 | 4 | 4 | 300 | 0   | 32407 | 126754 | 49797 | 10379069 | 115974 | 466413 | 175462 | 411646 | 211921 | 7356905 | 87777  |
| 80 | 3 | 5 | 4 | 4 | 300 | 0   | 34917 | 123868 | 47789 | 10328422 | 114482 | 451710 | 187987 | 406310 | 214904 | 7270865 | 86548  |
| 80 | 3 | 5 | 2 | 2 | 300 | 0   | 30829 | 121920 | 46080 | 9939064  | 109786 | 433786 | 192522 | 391592 | 198829 | 7040528 | 83338  |
| 80 | 3 | 5 | 6 | 6 | 300 | 0   | 37107 | 128799 | 42745 | 10355477 | 122718 | 471544 | 186725 | 418107 | 211631 | 7253295 | 95879  |
| 80 | 3 | 5 | 4 | 4 | 300 | 0   | 32768 | 125113 | 50000 | 10372384 | 112927 | 454066 | 173921 | 410570 | 211616 | 7274861 | 91179  |
| 80 | 3 | 1 | 4 | 4 | 300 | 0   | 0     | 54456  | 0     | 4038658  | 50013  | 179007 | 76577  | 168752 | 97047  | 2721893 | 38819  |
| 80 | 3 | 9 | 4 | 4 | 300 | 0   | 29553 | 125355 | 49211 | 10526184 | 118908 | 462763 | 178816 | 415421 | 214711 | 7410553 | 93118  |
| 80 | 1 | 5 | 4 | 4 | 300 | 0   | 27436 | 125409 | 44067 | 10035651 | 115356 | 446899 | 177477 | 405221 | 212940 | 7039396 | 93208  |
| 80 | 2 | 3 | 3 | 3 | 400 | 2.5 | 25725 | 112373 | 42548 | 9315173  | 102060 | 407693 | 147315 | 361245 | 188415 | 6518955 | 76403  |
| 80 | 3 | 5 | 2 | 2 | 300 | 0   | 28990 | 121124 | 43799 | 10045278 | 108569 | 438983 | 159753 | 390789 | 201010 | 7121485 | 84127  |
| 80 | 3 | 3 | 5 | 5 | 400 | 2.5 | 31546 | 131359 | 47731 | 10851521 | 122406 | 472082 | 188828 | 429813 | 220474 | 7678304 | 93092  |
| 80 | 3 | 5 | 6 | 6 | 300 | 0   | 33477 | 125166 | 45338 | 10394106 | 116384 | 453417 | 179801 | 415709 | 222258 | 7248139 | 90477  |
| 80 | 1 | 3 | 5 | 5 | 400 | 2.5 | 29838 | 110249 | 38632 | 9343346  | 103346 | 403172 | 153483 | 362985 | 189527 | 6544179 | 79154  |
| 80 | 1 | 3 | 5 | 5 | 400 | 2.5 | 27289 | 109303 | 36555 | 9252065  | 101716 | 399415 | 163881 | 361940 | 191256 | 6461294 | 83694  |
| 80 | 1 | 3 | 5 | 5 | 400 | 2.5 | 29714 | 110224 | 37438 | 9208010  | 104366 | 409142 | 153047 | 369701 | 191169 | 6450485 | 84714  |
| 80 | 1 | 7 | 3 | 3 | 400 | 2.5 | 30397 | 120434 | 43204 | 10229289 | 112279 | 446372 | 164394 | 402471 | 208781 | 7212105 | 86469  |

|     |   |   |   |   |     |     |       |        |       |          |        |        |        |        |        |         |        |
|-----|---|---|---|---|-----|-----|-------|--------|-------|----------|--------|--------|--------|--------|--------|---------|--------|
| 80  | 1 | 3 | 3 | 3 | 400 | 2.5 | 19836 | 81351  | 27664 | 6844843  | 78104  | 294104 | 111821 | 268134 | 145388 | 4735925 | 59425  |
| 80  | 1 | 7 | 5 | 5 | 400 | 2.5 | 34175 | 132238 | 49050 | 11084788 | 120813 | 483363 | 178100 | 432113 | 228775 | 7817075 | 91988  |
| 80  | 2 | 7 | 5 | 5 | 400 | 2.5 | 31397 | 129327 | 47132 | 10755898 | 117419 | 463678 | 191534 | 420075 | 221958 | 7631883 | 86808  |
| 80  | 2 | 3 | 5 | 5 | 400 | 2.5 | 32562 | 120224 | 42774 | 10071555 | 112512 | 442711 | 170348 | 395448 | 205025 | 7072910 | 90299  |
| 80  | 2 | 7 | 3 | 3 | 400 | 2.5 | 30743 | 132408 | 48022 | 11071203 | 124760 | 487946 | 178032 | 435572 | 225045 | 7860587 | 96542  |
| 80  | 2 | 3 | 5 | 5 | 400 | 5   | 31526 | 125211 | 54057 | 10491873 | 115323 | 454218 | 171079 | 410533 | 216538 | 7372841 | 94926  |
| 80  | 3 | 7 | 5 | 5 | 400 | 2.5 | 33731 | 131057 | 43134 | 10869527 | 121853 | 478221 | 181517 | 428520 | 214851 | 7679639 | 100087 |
| 80  | 3 | 7 | 3 | 3 | 400 | 2.5 | 31364 | 129724 | 46575 | 10692935 | 116465 | 461925 | 177256 | 420709 | 213837 | 7617678 | 101028 |
| 80  | 3 | 3 | 3 | 3 | 400 | 2.5 | 27963 | 116800 | 45467 | 9830222  | 111363 | 431422 | 170793 | 390911 | 199933 | 6922541 | 81785  |
| 80  | 3 | 7 | 5 | 5 | 400 | 5   | 29366 | 129502 | 47351 | 10741878 | 120361 | 468968 | 183221 | 421219 | 216965 | 7588756 | 97935  |
| 80  | 1 | 3 | 3 | 3 | 400 | 5   | 18060 | 84918  | 30351 | 7133881  | 80075  | 307657 | 122060 | 284022 | 152336 | 4956866 | 63530  |
| 80  | 1 | 7 | 5 | 5 | 400 | 5   | 31889 | 126259 | 56309 | 10807284 | 117370 | 469296 | 175012 | 418543 | 226889 | 7608469 | 99802  |
| 80  | 1 | 3 | 5 | 5 | 400 | 5   | 26225 | 110388 | 40375 | 9348588  | 103000 | 406188 | 154850 | 370488 | 192900 | 6528300 | 81350  |
| 80  | 1 | 7 | 3 | 3 | 400 | 5   | 28844 | 120030 | 40807 | 9837230  | 107822 | 432081 | 162489 | 387911 | 202022 | 6952963 | 76541  |
| 80  | 2 | 7 | 3 | 3 | 400 | 5   | 31145 | 130818 | 46287 | 10858810 | 119798 | 470222 | 180232 | 428791 | 221798 | 7725389 | 89596  |
| 80  | 2 | 3 | 3 | 3 | 400 | 5   | 25347 | 108975 | 35270 | 9187087  | 100146 | 395308 | 167203 | 358548 | 185844 | 6438290 | 79236  |
| 80  | 2 | 7 | 5 | 5 | 400 | 5   | 31377 | 135918 | 50918 | 11212903 | 126216 | 491266 | 193213 | 448685 | 222333 | 7935050 | 97419  |
| 80  | 3 | 3 | 3 | 3 | 400 | 5   | 28812 | 123090 | 46143 | 9977015  | 108962 | 432586 | 163474 | 391083 | 200872 | 7026729 | 87429  |
| 80  | 3 | 3 | 5 | 5 | 400 | 5   | 29629 | 126547 | 50928 | 10593750 | 122611 | 459641 | 180507 | 420062 | 212587 | 7471225 | 102166 |
| 80  | 3 | 7 | 3 | 3 | 400 | 5   | 30030 | 132558 | 46952 | 10904940 | 120256 | 474415 | 179510 | 432490 | 219626 | 7730359 | 96249  |
| 80  | 1 | 5 | 4 | 4 | 500 | 0   | 25840 | 119576 | 40848 | 10041768 | 110720 | 434760 | 161216 | 390560 | 205456 | 7069952 | 85216  |
| 80  | 1 | 5 | 4 | 4 | 500 | 0   | 29774 | 117014 | 41402 | 9930091  | 108388 | 430851 | 162709 | 385077 | 199350 | 6985853 | 86915  |
| 80  | 2 | 5 | 4 | 4 | 500 | 0   | 30140 | 129261 | 48447 | 10969317 | 119465 | 480303 | 189341 | 430036 | 219641 | 7784990 | 101780 |
| 80  | 2 | 5 | 4 | 4 | 500 | 0   | 30725 | 129426 | 47778 | 11002970 | 120547 | 477901 | 184206 | 431968 | 220982 | 7800483 | 89354  |
| 80  | 3 | 5 | 4 | 4 | 500 | 0   | 31126 | 123327 | 45579 | 10498116 | 114950 | 462782 | 170365 | 410854 | 212473 | 7434060 | 87455  |
| 80  | 3 | 5 | 4 | 4 | 500 | 0   | 31285 | 127743 | 47494 | 10620129 | 122337 | 470867 | 199221 | 421807 | 213526 | 7540297 | 83398  |
| 100 | 2 | 5 | 4 | 4 | 100 | 0   | 0     | 116396 | 0     | 9364000  | 105109 | 438812 | 160950 | 406851 | 209703 | 6553624 | 92950  |
| 100 | 2 | 5 | 4 | 4 | 300 | 7.5 | 36332 | 124013 | 44492 | 10361515 | 115987 | 459176 | 162897 | 402498 | 210498 | 7293449 | 102419 |
| 100 | 3 | 5 | 4 | 4 | 300 | 7.5 | 35694 | 122339 | 36173 | 10007508 | 115296 | 441940 | 167947 | 395694 | 207814 | 7045063 | 108704 |

|     |   |   |   |   |     |     |       |        |       |          |        |        |        |        |        |          |        |
|-----|---|---|---|---|-----|-----|-------|--------|-------|----------|--------|--------|--------|--------|--------|----------|--------|
| 100 | 1 | 5 | 4 | 4 | 100 | 0   | 0     | 140040 | 51240 | 9571400  | 123000 | 453920 | 170880 | 424480 | 224280 | 6697880  | 128520 |
| 100 | 1 | 5 | 4 | 4 | 300 | 7.5 | 43829 | 186079 | 67987 | 15669829 | 170039 | 678263 | 252474 | 606316 | 324211 | 11106539 | 135474 |
| 100 | 1 | 1 | 4 | 4 | 300 | 0   | 0     | 53664  | 17275 | 4198470  | 57919  | 187544 | 77517  | 183544 | 104376 | 2838765  | 44282  |
| 100 | 1 | 9 | 4 | 4 | 300 | 0   | 39640 | 146200 | 58413 | 11091600 | 118973 | 484173 | 208000 | 439707 | 229413 | 7844680  | 111760 |
| 100 | 2 | 5 | 4 | 4 | 300 | 0   | 33217 | 128910 | 54207 | 10365084 | 118716 | 451599 | 177672 | 413632 | 220174 | 7317391  | 110569 |
| 100 | 2 | 5 | 4 | 4 | 300 | 0   | 32685 | 122872 | 43289 | 10193919 | 115664 | 443369 | 175034 | 402336 | 195315 | 7189020  | 95718  |
| 100 | 2 | 5 | 4 | 4 | 300 | 0   | 46662 | 144407 | 47043 | 10406269 | 119816 | 453534 | 174584 | 412984 | 214177 | 7349128  | 110767 |
| 100 | 1 | 3 | 3 | 3 | 200 | 2.5 | 32063 | 123322 | 50298 | 9940171  | 111527 | 448346 | 179005 | 401766 | 203634 | 6983971  | 91156  |
| 100 | 1 | 5 | 4 | 4 | 300 | 0   | 35347 | 129293 | 41760 | 10271267 | 108627 | 439573 | 169520 | 409040 | 217680 | 7224507  | 96333  |
| 100 | 2 | 3 | 5 | 5 | 200 | 2.5 | 39926 | 133547 | 47488 | 10657759 | 125616 | 483300 | 186256 | 452291 | 229384 | 7491970  | 97956  |
| 100 | 2 | 7 | 3 | 3 | 200 | 2.5 | 33525 | 119550 | 37845 | 9936960  | 119505 | 451410 | 168015 | 395550 | 209430 | 6961425  | 114675 |
| 100 | 3 | 3 | 3 | 3 | 200 | 2.5 | 32821 | 121463 | 46254 | 9971164  | 119761 | 444164 | 179627 | 395955 | 205134 | 6967896  | 106194 |
| 100 | 3 | 7 | 5 | 5 | 200 | 2.5 | 32040 | 122065 | 38557 | 9614353  | 109428 | 430124 | 167711 | 392114 | 204751 | 6693706  | 113881 |
| 100 | 1 | 5 | 4 | 4 | 300 | 0   | 29183 | 122751 | 48478 | 10168757 | 113116 | 446525 | 173276 | 404066 | 207322 | 7186711  | 93355  |
| 100 | 1 | 7 | 3 | 3 | 200 | 5   | 30955 | 129612 | 41970 | 10654299 | 120224 | 462209 | 201119 | 419045 | 215806 | 7492731  | 95388  |
| 100 | 2 | 3 | 3 | 3 | 200 | 5   | 34358 | 119567 | 47179 | 9979463  | 115970 | 438806 | 176224 | 401597 | 207896 | 7015791  | 99567  |
| 100 | 2 | 7 | 5 | 5 | 200 | 5   | 41692 | 141338 | 43106 | 10063636 | 111591 | 461742 | 200960 | 435960 | 234116 | 7075859  | 108359 |
| 100 | 3 | 3 | 5 | 5 | 200 | 5   | 33168 | 116906 | 42030 | 9544876  | 109579 | 427178 | 188416 | 380990 | 203243 | 6648317  | 105470 |
| 100 | 3 | 7 | 3 | 3 | 200 | 5   | 31447 | 121568 | 46432 | 9889658  | 112342 | 433161 | 173111 | 395533 | 200171 | 6938608  | 117618 |
| 100 | 2 | 5 | 4 | 4 | 300 | 0   | 33522 | 128956 | 48795 | 10631407 | 118842 | 463825 | 182842 | 419596 | 224377 | 7498141  | 107111 |
| 100 | 2 | 1 | 4 | 4 | 300 | 0   | 23882 | 81263  | 24263 | 5720421  | 66605  | 243434 | 111355 | 257566 | 127092 | 3930421  | 65026  |
| 100 | 2 | 9 | 4 | 4 | 300 | 0   | 35262 | 140242 | 51517 | 10703101 | 121611 | 465906 | 189208 | 425919 | 221101 | 7499839  | 108913 |
| 100 | 3 | 5 | 4 | 4 | 300 | 0   | 30158 | 124763 | 39895 | 10247645 | 115526 | 450158 | 196039 | 404921 | 206526 | 7204066  | 117408 |
| 100 | 3 | 5 | 4 | 4 | 300 | 0   | 31840 | 128440 | 47733 | 10509293 | 118453 | 457627 | 178947 | 415880 | 213307 | 7409187  | 122813 |
| 100 | 3 | 5 | 4 | 4 | 300 | 0   | 32553 | 123289 | 47632 | 10061395 | 111342 | 447513 | 174592 | 397829 | 204395 | 7099013  | 120895 |
| 100 | 3 | 5 | 4 | 4 | 300 | 0   | 33794 | 133063 | 51269 | 11021940 | 124053 | 481860 | 191402 | 439455 | 217116 | 7747136  | 97874  |
| 100 | 3 | 1 | 4 | 4 | 300 | 0   | 19089 | 83617  | 23802 | 6369254  | 78587  | 281558 | 104290 | 256700 | 139683 | 4394640  | 72000  |
| 100 | 3 | 9 | 4 | 4 | 300 | 0   | 34366 | 129608 | 51399 | 10327359 | 115085 | 451137 | 174314 | 411804 | 204562 | 7291072  | 120641 |
| 100 | 1 | 5 | 2 | 2 | 300 | 0   | 30963 | 123278 | 42903 | 10033204 | 110013 | 438334 | 183023 | 389191 | 199819 | 7124515  | 91164  |



|     |   |   |   |   |     |     |       |        |       |          |        |        |        |        |        |         |        |
|-----|---|---|---|---|-----|-----|-------|--------|-------|----------|--------|--------|--------|--------|--------|---------|--------|
| 100 | 1 | 5 | 6 | 6 | 300 | 0   | 33373 | 130882 | 40843 | 10058196 | 118647 | 454706 | 181255 | 404157 | 219196 | 7052216 | 99176  |
| 100 | 1 | 5 | 4 | 4 | 300 | 0   | 33538 | 131639 | 53672 | 10653030 | 121351 | 468816 | 186033 | 419371 | 216294 | 7516803 | 93472  |
| 100 | 1 | 5 | 4 | 4 | 300 | 0   | 32415 | 127933 | 42595 | 10464080 | 113378 | 466943 | 173565 | 419184 | 209953 | 7361365 | 105151 |
| 100 | 2 | 5 | 2 | 2 | 300 | 0   | 30736 | 117583 | 45218 | 9958853  | 113648 | 447752 | 177121 | 391518 | 200958 | 7053140 | 99661  |
| 100 | 2 | 5 | 6 | 6 | 300 | 0   | 32040 | 125782 | 50475 | 9955743  | 109109 | 450871 | 169663 | 400515 | 207564 | 6954871 | 104950 |
| 100 | 1 | 7 | 5 | 5 | 200 | 2.5 | 41100 | 136525 | 46700 | 10502900 | 120025 | 468800 | 183050 | 429650 | 222600 | 7354775 | 96550  |
| 100 | 1 | 3 | 5 | 5 | 200 | 5   | 48475 | 138675 | 53325 | 10333600 | 118275 | 478700 | 198100 | 429725 | 230125 | 7282525 | 89375  |
| 100 | 3 | 5 | 2 | 2 | 300 | 0   | 37532 | 153130 | 54094 | 12332870 | 139532 | 546963 | 217766 | 497786 | 246408 | 8772033 | 117177 |
| 100 | 3 | 5 | 6 | 6 | 300 | 0   | 33656 | 123854 | 44026 | 10141510 | 115132 | 454013 | 174974 | 412192 | 205947 | 7126907 | 116166 |
| 100 | 1 | 3 | 5 | 5 | 400 | 2.5 | 41082 | 132289 | 59042 | 10676903 | 123184 | 463918 | 217687 | 425896 | 228818 | 7591654 | 92102  |
| 100 | 1 | 7 | 3 | 3 | 400 | 2.5 | 32259 | 134556 | 52844 | 11042274 | 122874 | 480519 | 185074 | 439156 | 221911 | 7862007 | 92778  |
| 100 | 2 | 3 | 3 | 3 | 400 | 2.5 | 30338 | 121737 | 45609 | 10230030 | 111895 | 444391 | 168165 | 401947 | 206496 | 7255496 | 95850  |
| 100 | 2 | 7 | 5 | 5 | 400 | 2.5 | 34574 | 129449 | 51291 | 10826115 | 120226 | 473784 | 202519 | 433183 | 219248 | 7675213 | 119348 |
| 100 | 3 | 3 | 5 | 5 | 400 | 2.5 | 33060 | 127724 | 48532 | 10217289 | 114241 | 451704 | 169104 | 402811 | 204391 | 7174838 | 109925 |
| 100 | 3 | 7 | 3 | 3 | 400 | 2.5 | 31782 | 126541 | 47481 | 10372218 | 113571 | 451857 | 174872 | 412398 | 205962 | 7374444 | 113744 |
| 100 | 1 | 3 | 3 | 3 | 400 | 5   | 33601 | 126290 | 46351 | 10234611 | 117000 | 453520 | 181797 | 407272 | 205537 | 7246158 | 96802  |
| 100 | 1 | 7 | 5 | 5 | 400 | 5   | 37644 | 133571 | 47055 | 11036980 | 124373 | 483108 | 200238 | 432744 | 223709 | 7817995 | 109799 |
| 100 | 2 | 3 | 5 | 5 | 400 | 5   | 34314 | 135349 | 51584 | 10872980 | 122918 | 476658 | 185860 | 438728 | 218504 | 7653055 | 103641 |
| 100 | 2 | 7 | 3 | 3 | 400 | 5   | 32554 | 128050 | 48847 | 10798849 | 118656 | 468824 | 178634 | 426141 | 214307 | 7670198 | 103277 |
| 100 | 3 | 3 | 3 | 3 | 400 | 5   | 33945 | 135998 | 46958 | 10994084 | 123715 | 483022 | 174983 | 433816 | 217712 | 7803074 | 106734 |
| 100 | 3 | 7 | 5 | 5 | 400 | 5   | 27719 | 109524 | 44436 | 8976742  | 99649  | 397281 | 153972 | 346867 | 182732 | 6110902 | 95840  |
| 100 | 2 | 5 | 4 | 4 | 500 | 0   | 31434 | 122582 | 49076 | 10343442 | 113952 | 453474 | 169442 | 409618 | 208056 | 7323928 | 97920  |
| 100 | 3 | 5 | 4 | 4 | 500 | 0   | 31673 | 125506 | 47044 | 10490040 | 116422 | 462821 | 191522 | 416518 | 208470 | 7433410 | 118805 |

Table 1. Continuation

| TP | TM | CO | VT | VA | M   | H   | C18:1 11t | C18:1 9c | C18:1 11c | C18:2 n6 | C20:0 | C18:3 n3 | CLA 9c, 11t | C20:4 n6 |
|----|----|----|----|----|-----|-----|-----------|----------|-----------|----------|-------|----------|-------------|----------|
| 60 | 1  | 5  | 4  | 4  | 100 | 0   | 862080    | 12665160 | 337520    | 1170520  | 0     | 748400   | 402080      | 301160   |
| 60 | 3  | 5  | 4  | 4  | 100 | 0   | 1051010   | 15918257 | 393267    | 1289267  | 0     | 842099   | 495129      | 322535   |
| 60 | 1  | 3  | 3  | 3  | 200 | 2.5 | 577224    | 8142940  | 235015    | 892881   | 20597 | 552642   | 255119      | 238433   |
| 60 | 1  | 7  | 5  | 5  | 200 | 2.5 | 907402    | 13458848 | 346495    | 1239020  | 33235 | 784681   | 415907      | 325147   |
| 60 | 2  | 3  | 5  | 5  | 200 | 2.5 | 923103    | 13828793 | 351084    | 1200640  | 36182 | 808916   | 429458      | 310887   |
| 60 | 3  | 3  | 3  | 3  | 200 | 2.5 | 939307    | 14029537 | 353356    | 1198507  | 35620 | 767502   | 418961      | 303498   |
| 60 | 3  | 7  | 5  | 5  | 200 | 2.5 | 1166975   | 17653200 | 433500    | 1380350  | 38900 | 921325   | 531375      | 350825   |
| 60 | 1  | 3  | 5  | 5  | 200 | 5   | 670659    | 9505951  | 275683    | 984707   | 0     | 621317   | 292073      | 269732   |
| 60 | 1  | 7  | 3  | 3  | 200 | 5   | 722766    | 10863073 | 299356    | 1146059  | 37288 | 702278   | 341473      | 306776   |
| 60 | 2  | 7  | 5  | 5  | 200 | 5   | 1040224   | 15771119 | 385846    | 1287438  | 40100 | 841045   | 480796      | 332040   |
| 60 | 3  | 3  | 5  | 5  | 200 | 5   | 1027034   | 15601201 | 384412    | 1301985  | 37181 | 855539   | 474118      | 320196   |
| 60 | 3  | 7  | 3  | 3  | 200 | 5   | 1055254   | 16250912 | 386941    | 1316166  | 38312 | 858746   | 481493      | 328302   |
| 60 | 1  | 5  | 4  | 4  | 300 | 7.5 | 660294    | 9707064  | 265525    | 1022301  | 26836 | 628548   | 295492      | 276361   |
| 60 | 2  | 5  | 4  | 4  | 300 | 7.5 | 928383    | 14102469 | 348304    | 1243960  | 38033 | 779776   | 420752      | 313716   |
| 60 | 3  | 5  | 4  | 4  | 300 | 7.5 | 1089145   | 16325632 | 405750    | 1365763  | 38145 | 854895   | 484474      | 326882   |
| 60 | 1  | 5  | 4  | 4  | 300 | 0   | 789223    | 11451987 | 298698    | 1124133  | 31841 | 699880   | 357116      | 293635   |
| 60 | 1  | 5  | 4  | 4  | 300 | 0   | 728613    | 10846853 | 286507    | 1082120  | 29747 | 665520   | 328880      | 285000   |
| 60 | 1  | 5  | 4  | 4  | 300 | 0   | 734855    | 10852763 | 294763    | 1082842  | 25566 | 673197   | 328461      | 286118   |
| 60 | 1  | 5  | 4  | 4  | 300 | 0   | 732321    | 10779639 | 284642    | 1097779  | 33231 | 676789   | 329057      | 288187   |
| 60 | 1  | 1  | 4  | 4  | 300 | 0   | 470508    | 6482535  | 197901    | 766007   | 19723 | 464673   | 199050      | 219657   |
| 60 | 1  | 9  | 4  | 4  | 300 | 0   | 512242    | 7757463  | 239154    | 1100537  | 22886 | 631221   | 237020      | 322523   |
| 60 | 1  | 5  | 2  | 2  | 300 | 0   | 454322    | 6583201  | 191960    | 821436   | 19490 | 483839   | 192987      | 231631   |
| 60 | 1  | 5  | 6  | 6  | 300 | 0   | 816931    | 11960297 | 319604    | 1128475  | 32178 | 713406   | 372594      | 301267   |
| 60 | 2  | 5  | 4  | 4  | 300 | 0   | 996174    | 15195839 | 362040    | 1302255  | 39718 | 812322   | 451235      | 321852   |
| 60 | 2  | 5  | 4  | 4  | 300 | 0   | 1017611   | 15627168 | 372528    | 1318653  | 40488 | 837360   | 471432      | 325782   |
| 60 | 2  | 5  | 4  | 4  | 300 | 0   | 1016970   | 15021666 | 371711    | 1265167  | 44944 | 819711   | 459069      | 333311   |

|    |   |   |   |   |     |     |         |          |        |         |       |        |        |        |
|----|---|---|---|---|-----|-----|---------|----------|--------|---------|-------|--------|--------|--------|
| 60 | 2 | 1 | 4 | 4 | 300 | 0   | 741203  | 10995673 | 285582 | 1091974 | 30353 | 673477 | 336497 | 287608 |
| 60 | 2 | 9 | 4 | 4 | 300 | 0   | 731226  | 11193364 | 300210 | 1204577 | 30505 | 731502 | 333167 | 326216 |
| 60 | 2 | 5 | 6 | 6 | 300 | 0   | 1054382 | 16116651 | 388283 | 1339046 | 45632 | 859382 | 487658 | 332546 |
| 60 | 3 | 5 | 4 | 4 | 300 | 0   | 1115685 | 16990111 | 395318 | 1355764 | 42164 | 870610 | 506216 | 324184 |
| 60 | 3 | 5 | 4 | 4 | 300 | 0   | 1069387 | 16506413 | 387733 | 1348587 | 37813 | 859200 | 490360 | 332573 |
| 60 | 3 | 5 | 4 | 4 | 300 | 0   | 1074483 | 16448886 | 387302 | 1373221 | 44577 | 856255 | 503034 | 328913 |
| 60 | 3 | 5 | 4 | 4 | 300 | 0   | 1097664 | 16814805 | 403638 | 1355638 | 33235 | 875383 | 497852 | 339973 |
| 60 | 3 | 1 | 4 | 4 | 300 | 0   | 873563  | 13265523 | 329470 | 1176821 | 32887 | 747444 | 396689 | 299921 |
| 60 | 3 | 9 | 4 | 4 | 300 | 0   | 935503  | 14450872 | 362336 | 1361933 | 36054 | 839396 | 425275 | 347114 |
| 60 | 3 | 5 | 2 | 2 | 300 | 0   | 905255  | 13672940 | 326872 | 1259752 | 33208 | 787383 | 408819 | 316188 |
| 60 | 3 | 5 | 6 | 6 | 300 | 0   | 1209533 | 18062980 | 437428 | 1432283 | 40618 | 927770 | 541125 | 356862 |
| 60 | 1 | 3 | 5 | 5 | 400 | 2.5 | 544597  | 7728992  | 224584 | 872645  | 20730 | 531272 | 233980 | 241763 |
| 60 | 1 | 7 | 3 | 3 | 400 | 2.5 | 538151  | 8138844  | 229738 | 1021960 | 25418 | 593109 | 240542 | 283656 |
| 60 | 2 | 3 | 3 | 3 | 400 | 2.5 | 536111  | 7645867  | 216926 | 896748  | 25400 | 531548 | 230148 | 245259 |
| 60 | 3 | 3 | 5 | 5 | 400 | 2.5 | 936733  | 14054751 | 352618 | 1262332 | 33491 | 797843 | 422469 | 319925 |
| 60 | 3 | 7 | 3 | 3 | 400 | 2.5 | 1019489 | 15547429 | 364624 | 1351331 | 38263 | 843549 | 457820 | 332075 |
| 60 | 1 | 3 | 3 | 3 | 400 | 5   | 316174  | 4276833  | 134856 | 582886  | 14273 | 354174 | 125652 | 174530 |
| 60 | 1 | 7 | 5 | 5 | 400 | 5   | 752714  | 11339271 | 311193 | 1204410 | 33907 | 726432 | 340905 | 323518 |
| 60 | 2 | 3 | 5 | 5 | 400 | 5   | 750442  | 11114318 | 292121 | 1103750 | 29495 | 679470 | 334785 | 287109 |
| 60 | 2 | 7 | 3 | 3 | 400 | 5   | 767910  | 11705551 | 298257 | 1218195 | 32948 | 727788 | 348389 | 316631 |
| 60 | 3 | 3 | 3 | 3 | 400 | 5   | 627970  | 9318104  | 250030 | 1000630 | 25830 | 610185 | 276081 | 267830 |
| 60 | 3 | 7 | 5 | 5 | 400 | 5   | 1140264 | 17386307 | 416683 | 1425327 | 52538 | 900503 | 524548 | 341884 |
| 60 | 1 | 5 | 4 | 4 | 500 | 0   | 630998  | 9306333  | 253643 | 1046269 | 28016 | 620353 | 276096 | 280337 |
| 60 | 2 | 5 | 4 | 4 | 500 | 0   | 904940  | 13666980 | 332763 | 1297655 | 36225 | 789896 | 412651 | 321213 |
| 60 | 3 | 5 | 4 | 4 | 500 | 0   | 1144040 | 17327703 | 415463 | 1585411 | 44080 | 975110 | 506677 | 393002 |
| 70 | 1 | 5 | 4 | 4 | 100 | 0   | 1008699 | 15103456 | 386485 | 1267806 | 0     | 829204 | 464466 | 320777 |
| 70 | 1 | 3 | 5 | 5 | 200 | 2.5 | 927550  | 13930300 | 362050 | 1242250 | 36300 | 797425 | 425525 | 317875 |
| 70 | 1 | 7 | 5 | 5 | 200 | 5   | 1055051 | 16040152 | 334899 | 1337828 | 41591 | 863712 | 476061 | 340303 |
| 70 | 2 | 5 | 2 | 2 | 300 | 0   | 1019974 | 15670337 | 318594 | 1354125 | 38818 | 848680 | 457221 | 328224 |

|    |   |   |   |   |     |     |         |          |        |         |       |        |        |        |
|----|---|---|---|---|-----|-----|---------|----------|--------|---------|-------|--------|--------|--------|
| 70 | 1 | 5 | 4 | 4 | 300 | 7.5 | 873168  | 13060980 | 282523 | 1216859 | 34148 | 758362 | 389651 | 307087 |
| 70 | 1 | 7 | 3 | 3 | 200 | 2.5 | 998789  | 15226915 | 372000 | 1302769 | 37387 | 826131 | 452955 | 324121 |
| 70 | 2 | 3 | 3 | 3 | 200 | 2.5 | 1016324 | 15550574 | 373544 | 1310750 | 38647 | 835500 | 459441 | 324971 |
| 70 | 2 | 7 | 5 | 5 | 200 | 2.5 | 1170600 | 17828325 | 370975 | 1389025 | 43150 | 914525 | 507875 | 347525 |
| 70 | 3 | 7 | 3 | 3 | 200 | 2.5 | 1118134 | 17229881 | 402299 | 1352746 | 42910 | 867164 | 477284 | 323552 |
| 70 | 1 | 3 | 3 | 3 | 200 | 5   | 738211  | 10952563 | 251668 | 1080950 | 29307 | 678106 | 328266 | 285829 |
| 70 | 1 | 5 | 4 | 4 | 300 | 0   | 971144  | 14727799 | 367813 | 1282288 | 38475 | 810395 | 437030 | 318341 |
| 70 | 2 | 3 | 5 | 5 | 200 | 5   | 1101990 | 16728358 | 345572 | 1352637 | 39900 | 890970 | 498930 | 338806 |
| 70 | 2 | 7 | 3 | 3 | 200 | 5   | 1123258 | 17446939 | 341682 | 1379455 | 42894 | 883197 | 496955 | 331970 |
| 70 | 3 | 3 | 3 | 3 | 200 | 5   | 1060054 | 16217644 | 385396 | 1311149 | 40604 | 841634 | 477609 | 317450 |
| 70 | 3 | 5 | 2 | 2 | 300 | 0   | 1072980 | 16471510 | 330423 | 1340805 | 38604 | 850074 | 475215 | 324362 |
| 70 | 3 | 3 | 5 | 5 | 200 | 2.5 | 1076061 | 16389192 | 395909 | 1306768 | 40480 | 855227 | 479545 | 328131 |
| 70 | 3 | 7 | 5 | 5 | 200 | 5   | 1166275 | 17738700 | 425300 | 1365300 | 47425 | 902475 | 492900 | 337025 |
| 70 | 1 | 5 | 4 | 4 | 300 | 0   | 967280  | 14830920 | 365760 | 1294013 | 36880 | 816187 | 438307 | 320533 |
| 70 | 2 | 5 | 4 | 4 | 100 | 0   | 1067373 | 15814627 | 401059 | 1283020 | 0     | 844706 | 473529 | 317451 |
| 70 | 3 | 5 | 4 | 4 | 100 | 0   | 1108769 | 16027885 | 399885 | 1279308 | 0     | 852615 | 468769 | 315577 |
| 70 | 1 | 5 | 2 | 2 | 300 | 0   | 676317  | 10238178 | 268620 | 1097888 | 27776 | 656396 | 299333 | 285578 |
| 70 | 1 | 5 | 6 | 6 | 300 | 0   | 1068691 | 16077730 | 329191 | 1307842 | 40224 | 855039 | 477513 | 330474 |
| 70 | 1 | 5 | 4 | 4 | 300 | 0   | 986230  | 14929823 | 316748 | 1296210 | 38544 | 820669 | 442767 | 324341 |
| 70 | 1 | 5 | 4 | 4 | 300 | 0   | 1003639 | 15347251 | 321793 | 1344268 | 38662 | 839050 | 451826 | 330154 |
| 70 | 1 | 7 | 5 | 5 | 400 | 2.5 | 1080625 | 16691513 | 400700 | 1412500 | 41163 | 885363 | 487038 | 345738 |
| 70 | 1 | 3 | 5 | 5 | 400 | 5   | 753325  | 11152655 | 299876 | 1106228 | 29194 | 686241 | 332382 | 291824 |
| 70 | 1 | 1 | 4 | 4 | 300 | 0   | 104399  | 1454033  | 51017  | 231641  | 0     | 141608 | 40399  | 70844  |
| 70 | 1 | 9 | 4 | 4 | 300 | 0   | 935427  | 14413507 | 310453 | 1366613 | 36907 | 845867 | 418667 | 353640 |
| 70 | 2 | 5 | 4 | 4 | 300 | 7.5 | 1080170 | 16625666 | 394675 | 1355685 | 42072 | 864459 | 485325 | 327410 |
| 70 | 3 | 5 | 4 | 4 | 300 | 7.5 | 1116660 | 17419221 | 402561 | 1392594 | 42482 | 886389 | 497492 | 339446 |
| 70 | 2 | 5 | 4 | 4 | 300 | 0   | 1087163 | 16811402 | 392292 | 1351442 | 40744 | 861236 | 487096 | 326020 |
| 70 | 2 | 5 | 4 | 4 | 300 | 0   | 1107240 | 17388173 | 409053 | 1396600 | 43307 | 894227 | 500427 | 340173 |
| 70 | 2 | 5 | 4 | 4 | 300 | 0   | 1099841 | 17056119 | 402212 | 1372649 | 42967 | 874675 | 494291 | 329801 |

|    |   |   |   |   |     |     |         |          |        |         |       |         |        |        |
|----|---|---|---|---|-----|-----|---------|----------|--------|---------|-------|---------|--------|--------|
| 70 | 2 | 5 | 4 | 4 | 300 | 0   | 1123086 | 17419762 | 349974 | 1398715 | 43205 | 894874  | 504596 | 336411 |
| 70 | 2 | 1 | 4 | 4 | 300 | 0   | 145716  | 1986746  | 72317  | 341162  | 0     | 202574  | 58825  | 104000 |
| 70 | 2 | 9 | 4 | 4 | 300 | 0   | 1088609 | 17052464 | 342066 | 1404371 | 43232 | 895523  | 477364 | 347404 |
| 70 | 3 | 5 | 4 | 4 | 300 | 0   | 1094490 | 17175483 | 396079 | 1362278 | 42371 | 873298  | 484464 | 327523 |
| 70 | 3 | 5 | 4 | 4 | 300 | 0   | 1134203 | 17639593 | 406085 | 1394833 | 42964 | 896682  | 498636 | 335554 |
| 70 | 1 | 3 | 3 | 3 | 400 | 2.5 | 502032  | 7246849  | 210839 | 855252  | 21104 | 515228  | 211441 | 238010 |
| 70 | 1 | 5 | 4 | 4 | 500 | 0   | 836946  | 12653371 | 312786 | 1207503 | 32232 | 738453  | 373531 | 304786 |
| 70 | 2 | 3 | 5 | 5 | 400 | 2.5 | 1063693 | 16141545 | 384485 | 1354761 | 41030 | 852161  | 476080 | 328869 |
| 70 | 2 | 7 | 3 | 3 | 400 | 2.5 | 1068045 | 16468032 | 334429 | 1371344 | 40002 | 864800  | 474397 | 330606 |
| 70 | 3 | 3 | 3 | 3 | 400 | 2.5 | 894672  | 13792873 | 329149 | 1243955 | 34336 | 770291  | 401881 | 305828 |
| 70 | 3 | 7 | 5 | 5 | 400 | 2.5 | 1183127 | 18464603 | 418759 | 1457841 | 44789 | 930136  | 506563 | 351030 |
| 70 | 1 | 7 | 3 | 3 | 400 | 5   | 814713  | 12522277 | 315404 | 1256701 | 33000 | 759060  | 367227 | 322594 |
| 70 | 2 | 3 | 3 | 3 | 400 | 5   | 726037  | 10895768 | 283145 | 1118027 | 30060 | 673362  | 321127 | 286616 |
| 70 | 2 | 7 | 5 | 5 | 400 | 5   | 1175995 | 18237836 | 424540 | 1458321 | 45124 | 927973  | 519714 | 352761 |
| 70 | 3 | 3 | 5 | 5 | 400 | 5   | 1075825 | 16679375 | 389563 | 1347838 | 40188 | 858263  | 484125 | 326688 |
| 70 | 3 | 7 | 3 | 3 | 400 | 5   | 1117784 | 17367201 | 380142 | 1390104 | 42351 | 884134  | 493194 | 333381 |
| 70 | 3 | 5 | 4 | 4 | 300 | 0   | 1105515 | 17269355 | 399309 | 1365621 | 41741 | 875309  | 488027 | 326140 |
| 70 | 3 | 5 | 4 | 4 | 300 | 0   | 1160901 | 17925629 | 414993 | 1398583 | 44636 | 899656  | 509483 | 335682 |
| 70 | 3 | 9 | 4 | 4 | 300 | 0   | 1252827 | 19435840 | 455827 | 1590760 | 51493 | 1009280 | 537320 | 387307 |
| 70 | 2 | 5 | 4 | 4 | 500 | 0   | 1114576 | 17016176 | 393648 | 1413976 | 41280 | 892176  | 493696 | 341456 |
| 70 | 3 | 1 | 4 | 4 | 300 | 0   | 224389  | 2915020  | 104940 | 473919  | 0     | 281906  | 85732  | 147396 |
| 70 | 3 | 5 | 4 | 4 | 500 | 0   | 1117387 | 17481868 | 389539 | 1407335 | 41242 | 893852  | 500681 | 337820 |
| 70 | 2 | 5 | 6 | 6 | 300 | 0   | 1110964 | 17136138 | 407469 | 1337370 | 40564 | 876177  | 499731 | 333148 |
| 70 | 3 | 5 | 6 | 6 | 300 | 0   | 1180938 | 17982728 | 422833 | 1384859 | 45698 | 900393  | 507561 | 334170 |
| 80 | 2 | 5 | 4 | 4 | 100 | 0   | 1125800 | 16924800 | 422120 | 1339200 | 0     | 864160  | 440640 | 317200 |
| 80 | 2 | 5 | 4 | 4 | 100 | 0   | 1084320 | 16167800 | 353160 | 1295920 | 0     | 866920  | 440840 | 319640 |
| 80 | 3 | 5 | 4 | 4 | 100 | 0   | 1242835 | 18199689 | 467728 | 1471029 | 0     | 975689  | 456388 | 418641 |
| 80 | 3 | 5 | 4 | 4 | 100 | 0   | 1150720 | 17432240 | 367600 | 1369520 | 0     | 931120  | 419000 | 344080 |
| 80 | 1 | 5 | 4 | 4 | 100 | 0   | 1090920 | 16033320 | 418360 | 1307120 | 0     | 854520  | 471760 | 338320 |

|    |   |   |   |   |     |     |         |          |        |         |       |         |        |        |
|----|---|---|---|---|-----|-----|---------|----------|--------|---------|-------|---------|--------|--------|
| 80 | 1 | 5 | 4 | 4 | 100 | 0   | 1116510 | 16533490 | 428627 | 1328549 | 0     | 866902  | 472471 | 342745 |
| 80 | 1 | 5 | 4 | 4 | 300 | 7.5 | 1074539 | 16750316 | 390461 | 1368592 | 42829 | 869303  | 480526 | 333947 |
| 80 | 2 | 5 | 4 | 4 | 300 | 7.5 | 1149040 | 17909787 | 354693 | 1387920 | 41107 | 900920  | 488720 | 340987 |
| 80 | 1 | 3 | 3 | 3 | 200 | 2.5 | 998216  | 15167035 | 379688 | 1264960 | 36045 | 805643  | 436884 | 314005 |
| 80 | 1 | 5 | 4 | 4 | 300 | 7.5 | 1057373 | 16513215 | 391327 | 1361518 | 44766 | 861967  | 475076 | 327617 |
| 80 | 1 | 7 | 5 | 5 | 200 | 2.5 | 1219752 | 18095248 | 444158 | 1406708 | 48193 | 923441  | 510000 | 345817 |
| 80 | 1 | 7 | 3 | 3 | 200 | 2.5 | 1153034 | 17946798 | 417281 | 1403542 | 45828 | 888310  | 495901 | 332232 |
| 80 | 2 | 3 | 5 | 5 | 200 | 2.5 | 1090200 | 17001175 | 352525 | 1325075 | 31375 | 866350  | 468300 | 334100 |
| 80 | 2 | 7 | 3 | 3 | 200 | 2.5 | 1123055 | 17251176 | 414558 | 1360673 | 42166 | 876829  | 446231 | 332668 |
| 80 | 2 | 3 | 3 | 3 | 200 | 2.5 | 1076433 | 16703761 | 349612 | 1318597 | 43731 | 855343  | 464746 | 318940 |
| 80 | 2 | 7 | 5 | 5 | 200 | 2.5 | 1143209 | 17373209 | 365149 | 1336194 | 45796 | 890448  | 444900 | 335746 |
| 80 | 3 | 3 | 3 | 3 | 200 | 2.5 | 1129868 | 17512250 | 418103 | 1370500 | 48912 | 890912  | 472618 | 337853 |
| 80 | 3 | 7 | 5 | 5 | 200 | 2.5 | 1208675 | 18319600 | 452475 | 1470975 | 45550 | 958050  | 424075 | 358625 |
| 80 | 3 | 3 | 5 | 5 | 200 | 2.5 | 1181465 | 17740404 | 433687 | 1448359 | 55000 | 928763  | 481086 | 565556 |
| 80 | 3 | 7 | 3 | 3 | 200 | 2.5 | 1241672 | 18932209 | 446970 | 1502836 | 48090 | 970761  | 449836 | 363582 |
| 80 | 1 | 3 | 5 | 5 | 200 | 2.5 | 1662365 | 25872956 | 616872 | 2155640 | 65296 | 1381232 | 740222 | 530443 |
| 80 | 1 | 7 | 3 | 3 | 200 | 5   | 1160436 | 17285317 | 424411 | 1438500 | 44465 | 914777  | 501757 | 357178 |
| 80 | 1 | 3 | 3 | 3 | 200 | 5   | 992970  | 15284099 | 368261 | 1296901 | 43685 | 822044  | 443897 | 318916 |
| 80 | 1 | 3 | 5 | 5 | 200 | 5   | 1122153 | 16444703 | 426955 | 1376683 | 42450 | 892475  | 493787 | 343564 |
| 80 | 2 | 3 | 3 | 3 | 200 | 5   | 1089627 | 17126851 | 392597 | 1350881 | 36373 | 868015  | 483851 | 328776 |
| 80 | 2 | 7 | 5 | 5 | 200 | 5   | 1123266 | 17165578 | 435377 | 1354749 | 41784 | 889121  | 441608 | 390276 |
| 80 | 2 | 3 | 5 | 5 | 200 | 5   | 1152228 | 17554356 | 364035 | 1366906 | 44530 | 894901  | 491213 | 344010 |
| 80 | 2 | 7 | 3 | 3 | 200 | 5   | 1109985 | 17158373 | 347716 | 1362507 | 44254 | 874642  | 448687 | 336239 |
| 80 | 3 | 3 | 5 | 5 | 200 | 5   | 1132637 | 17602463 | 431393 | 1398532 | 38383 | 903060  | 465622 | 342736 |
| 80 | 3 | 7 | 3 | 3 | 200 | 5   | 1160111 | 18240121 | 420724 | 1433503 | 47065 | 918859  | 430236 | 343628 |
| 80 | 3 | 3 | 3 | 3 | 200 | 5   | 1194015 | 18217020 | 438060 | 1474695 | 46530 | 936675  | 509580 | 357690 |
| 80 | 3 | 7 | 5 | 5 | 200 | 5   | 1814199 | 28616408 | 656845 | 2216990 | 75291 | 1428932 | 692718 | 528301 |
| 80 | 2 | 5 | 4 | 4 | 300 | 7.5 | 1211680 | 18181213 | 356480 | 1408853 | 41280 | 917600  | 498667 | 329573 |
| 80 | 3 | 5 | 4 | 4 | 300 | 7.5 | 1075490 | 16976430 | 386430 | 1291866 | 41409 | 837906  | 432430 | 313866 |

|    |   |   |   |   |     |     |         |          |        |         |       |         |        |        |
|----|---|---|---|---|-----|-----|---------|----------|--------|---------|-------|---------|--------|--------|
| 80 | 3 | 5 | 4 | 4 | 300 | 7.5 | 1070658 | 17058365 | 381754 | 1313223 | 27601 | 832532  | 425927 | 316027 |
| 80 | 1 | 7 | 5 | 5 | 200 | 5   | 1164332 | 17608713 | 363960 | 1360272 | 42178 | 889307  | 485941 | 331782 |
| 80 | 1 | 5 | 4 | 4 | 300 | 0   | 1493070 | 23152040 | 533645 | 1934087 | 57579 | 1224040 | 661846 | 474381 |
| 80 | 1 | 5 | 4 | 4 | 300 | 0   | 1099553 | 17018816 | 405092 | 1352066 | 45118 | 871632  | 486224 | 326303 |
| 80 | 1 | 5 | 4 | 4 | 300 | 0   | 1117875 | 17261307 | 397518 | 1396818 | 45122 | 884568  | 494746 | 341479 |
| 80 | 1 | 1 | 4 | 4 | 300 | 0   | 196797  | 2574684  | 93648  | 408027  | 0     | 242884  | 77103  | 131468 |
| 80 | 1 | 9 | 4 | 4 | 300 | 0   | 1349806 | 20855880 | 477191 | 1592080 | 55090 | 1015197 | 453003 | 386970 |
| 80 | 1 | 5 | 4 | 4 | 300 | 0   | 1115707 | 17260587 | 397893 | 1382667 | 45627 | 886080  | 489360 | 339253 |
| 80 | 1 | 5 | 4 | 4 | 300 | 0   | 1098224 | 17296434 | 401066 | 1391395 | 41566 | 883566  | 490171 | 336829 |
| 80 | 1 | 5 | 4 | 4 | 300 | 0   | 1177329 | 18376868 | 434395 | 1503684 | 47132 | 952987  | 524763 | 367987 |
| 80 | 1 | 5 | 2 | 2 | 300 | 0   | 908373  | 14179307 | 328900 | 1272693 | 35627 | 781327  | 404547 | 311187 |
| 80 | 1 | 5 | 6 | 6 | 300 | 0   | 1144560 | 17726500 | 429220 | 1397860 | 39920 | 898260  | 503120 | 350520 |
| 80 | 1 | 5 | 4 | 4 | 300 | 0   | 640773  | 9568507  | 277667 | 1087147 | 25787 | 654240  | 280520 | 302987 |
| 80 | 1 | 5 | 4 | 4 | 300 | 0   | 634373  | 9534587  | 272400 | 1085947 | 21627 | 645453  | 280987 | 296080 |
| 80 | 1 | 1 | 4 | 4 | 300 | 0   | 186631  | 2421834  | 83508  | 380306  | 0     | 230671  | 76598  | 126724 |
| 80 | 1 | 9 | 4 | 4 | 300 | 0   | 1193935 | 18673307 | 424275 | 1448288 | 45137 | 911046  | 429529 | 347673 |
| 80 | 2 | 5 | 4 | 4 | 300 | 0   | 1151801 | 17753669 | 350066 | 1378013 | 47669 | 897483  | 474026 | 334437 |
| 80 | 2 | 5 | 4 | 4 | 300 | 0   | 1210475 | 18167144 | 427064 | 1444294 | 50475 | 934261  | 499371 | 354395 |
| 80 | 2 | 5 | 4 | 4 | 300 | 0   | 1126493 | 17621293 | 420480 | 1388667 | 41373 | 885760  | 475880 | 332067 |
| 80 | 1 | 5 | 2 | 2 | 300 | 0   | 948350  | 14154924 | 300634 | 1257155 | 31993 | 775815  | 413835 | 310106 |
| 80 | 1 | 5 | 6 | 6 | 300 | 0   | 1104393 | 17132439 | 418800 | 1382361 | 40505 | 889397  | 488243 | 342452 |
| 80 | 2 | 5 | 4 | 4 | 300 | 0   | 1154684 | 18062158 | 362461 | 1411816 | 44474 | 917513  | 480329 | 377316 |
| 80 | 2 | 1 | 4 | 4 | 300 | 0   | 304040  | 4338565  | 143708 | 625223  | 0     | 366166  | 129834 | 179083 |
| 80 | 2 | 9 | 4 | 4 | 300 | 0   | 1181729 | 18340898 | 415670 | 1384686 | 43604 | 894086  | 440607 | 336607 |
| 80 | 2 | 5 | 4 | 4 | 300 | 0   | 1075373 | 17042471 | 388614 | 1317320 | 41516 | 851791  | 444915 | 319660 |
| 80 | 2 | 5 | 4 | 4 | 300 | 0   | 1074278 | 17053629 | 383960 | 1335099 | 43722 | 852781  | 454026 | 312212 |
| 80 | 2 | 5 | 4 | 4 | 300 | 0   | 1108613 | 17502853 | 397307 | 1357160 | 38867 | 868280  | 459827 | 330240 |
| 80 | 2 | 5 | 2 | 2 | 300 | 0   | 1035532 | 16347873 | 346809 | 1316100 | 39960 | 831304  | 447458 | 314803 |
| 80 | 2 | 5 | 6 | 6 | 300 | 0   | 1108415 | 17326074 | 416127 | 1323271 | 32308 | 859043  | 455017 | 325224 |

|    |   |   |   |   |     |     |         |          |        |         |       |         |        |        |
|----|---|---|---|---|-----|-----|---------|----------|--------|---------|-------|---------|--------|--------|
| 80 | 2 | 5 | 4 | 4 | 300 | 0   | 1129705 | 17918779 | 402309 | 1373087 | 46403 | 879651  | 471007 | 323087 |
| 80 | 2 | 1 | 4 | 4 | 300 | 0   | 308507  | 4247080  | 141280 | 607560  | 0     | 361960  | 126760 | 181907 |
| 80 | 2 | 9 | 4 | 4 | 300 | 0   | 1157128 | 18250518 | 413180 | 1392026 | 61311 | 897639  | 460026 | 327856 |
| 80 | 3 | 5 | 4 | 4 | 300 | 0   | 1071128 | 17098255 | 389705 | 1319906 | 42188 | 843154  | 422215 | 319436 |
| 80 | 3 | 5 | 4 | 4 | 300 | 0   | 1098566 | 17440303 | 394908 | 1317684 | 48355 | 853329  | 438039 | 314829 |
| 80 | 3 | 5 | 4 | 4 | 300 | 0   | 1076728 | 17027974 | 384026 | 1307775 | 37364 | 846821  | 418543 | 310358 |
| 80 | 2 | 5 | 2 | 2 | 300 | 0   | 1048047 | 16557899 | 324653 | 1323300 | 40943 | 835111  | 462444 | 311542 |
| 80 | 2 | 5 | 6 | 6 | 300 | 0   | 1314282 | 20470993 | 473215 | 1518725 | 44698 | 1003369 | 524477 | 379168 |
| 80 | 3 | 5 | 4 | 4 | 300 | 0   | 1117080 | 17443267 | 414280 | 1313693 | 43547 | 849560  | 431773 | 319493 |
| 80 | 3 | 1 | 4 | 4 | 300 | 0   | 403064  | 5810528  | 180067 | 757351  | 17579 | 444763  | 172441 | 218662 |
| 80 | 3 | 9 | 4 | 4 | 300 | 0   | 1116805 | 17667745 | 406805 | 1385517 | 38322 | 869597  | 382886 | 320752 |
| 80 | 3 | 5 | 4 | 4 | 300 | 0   | 1080918 | 17155410 | 390125 | 1326177 | 20144 | 849469  | 434938 | 317482 |
| 80 | 3 | 5 | 4 | 4 | 300 | 0   | 1090728 | 17032708 | 391148 | 1314085 | 45836 | 854557  | 433482 | 319830 |
| 80 | 3 | 5 | 4 | 4 | 300 | 0   | 1076462 | 16974442 | 382614 | 1309901 | 47182 | 846733  | 419960 | 311934 |
| 80 | 3 | 5 | 2 | 2 | 300 | 0   | 1045793 | 16448943 | 320957 | 1290582 | 36120 | 823405  | 441579 | 305023 |
| 80 | 3 | 5 | 6 | 6 | 300 | 0   | 1102953 | 16979275 | 336242 | 1300409 | 48181 | 840705  | 417765 | 314376 |
| 80 | 3 | 5 | 4 | 4 | 300 | 0   | 1084305 | 17124450 | 389232 | 1298795 | 40662 | 845258  | 428821 | 309152 |
| 80 | 3 | 1 | 4 | 4 | 300 | 0   | 427463  | 6040805  | 184349 | 765597  | 0     | 455154  | 179651 | 222846 |
| 80 | 3 | 9 | 4 | 4 | 300 | 0   | 1091118 | 17439079 | 383026 | 1347079 | 42789 | 858579  | 379066 | 335658 |
| 80 | 1 | 5 | 4 | 4 | 300 | 0   | 1072537 | 16527409 | 404094 | 1350067 | 41597 | 858685  | 473664 | 332054 |
| 80 | 2 | 3 | 3 | 3 | 400 | 2.5 | 963308  | 15102915 | 344513 | 1270575 | 36645 | 792608  | 440168 | 304665 |
| 80 | 3 | 5 | 2 | 2 | 300 | 0   | 1050622 | 16564575 | 311833 | 1294569 | 42308 | 829926  | 442689 | 306080 |
| 80 | 3 | 3 | 5 | 5 | 400 | 2.5 | 1123865 | 17943554 | 403990 | 1367045 | 43890 | 877182  | 477556 | 330848 |
| 80 | 3 | 5 | 6 | 6 | 300 | 0   | 1102828 | 17032669 | 401444 | 1304046 | 45219 | 842940  | 418093 | 314921 |
| 80 | 1 | 3 | 5 | 5 | 400 | 2.5 | 957090  | 15146915 | 351269 | 1263209 | 36244 | 789017  | 430012 | 308545 |
| 80 | 1 | 3 | 5 | 5 | 400 | 2.5 | 961990  | 15093831 | 358433 | 1247525 | 35299 | 781704  | 423072 | 308259 |
| 80 | 1 | 3 | 5 | 5 | 400 | 2.5 | 962015  | 15039192 | 365000 | 1250958 | 30087 | 786294  | 434975 | 310124 |
| 80 | 1 | 7 | 3 | 3 | 400 | 2.5 | 1080254 | 16728898 | 375621 | 1367708 | 40227 | 860027  | 455686 | 327367 |
| 80 | 1 | 3 | 3 | 3 | 400 | 2.5 | 692642  | 10790261 | 271724 | 1081642 | 22090 | 649291  | 307724 | 271851 |



|     |   |   |   |   |     |     |         |          |        |         |       |        |        |        |
|-----|---|---|---|---|-----|-----|---------|----------|--------|---------|-------|--------|--------|--------|
| 80  | 1 | 7 | 5 | 5 | 400 | 2.5 | 1150088 | 18304625 | 408038 | 1423550 | 51138 | 902600 | 493075 | 333113 |
| 80  | 2 | 7 | 5 | 5 | 400 | 2.5 | 1123242 | 17817968 | 399626 | 1375287 | 42556 | 877606 | 448217 | 331347 |
| 80  | 2 | 3 | 5 | 5 | 400 | 2.5 | 1042649 | 16630609 | 376182 | 1307662 | 41679 | 834701 | 457836 | 319241 |
| 80  | 2 | 7 | 3 | 3 | 400 | 2.5 | 1174856 | 18382604 | 357460 | 1450574 | 43619 | 918780 | 484842 | 343968 |
| 80  | 2 | 3 | 5 | 5 | 400 | 5   | 1085273 | 17326377 | 389888 | 1358065 | 41935 | 861712 | 480025 | 327519 |
| 80  | 3 | 7 | 5 | 5 | 400 | 2.5 | 1153881 | 17939030 | 413520 | 1347363 | 43371 | 864925 | 412699 | 329080 |
| 80  | 3 | 7 | 3 | 3 | 400 | 2.5 | 1128188 | 17687668 | 374276 | 1360085 | 40756 | 871786 | 442734 | 322191 |
| 80  | 3 | 3 | 3 | 3 | 400 | 2.5 | 1028852 | 16118467 | 350763 | 1302281 | 39830 | 827993 | 446437 | 308037 |
| 80  | 3 | 7 | 5 | 5 | 400 | 5   | 1107662 | 17729428 | 394701 | 1355721 | 45274 | 874714 | 415187 | 333756 |
| 80  | 1 | 3 | 3 | 3 | 400 | 5   | 747604  | 11205821 | 282910 | 1096164 | 29284 | 671679 | 317769 | 280336 |
| 80  | 1 | 7 | 5 | 5 | 400 | 5   | 1127556 | 17851012 | 406333 | 1398222 | 35753 | 882210 | 484840 | 333444 |
| 80  | 1 | 3 | 5 | 5 | 400 | 5   | 975650  | 15151500 | 355475 | 1267963 | 32825 | 804263 | 431950 | 312700 |
| 80  | 1 | 7 | 3 | 3 | 400 | 5   | 1026289 | 15987356 | 356630 | 1341274 | 38659 | 834970 | 447904 | 325081 |
| 80  | 2 | 7 | 3 | 3 | 400 | 5   | 1147728 | 17923399 | 389252 | 1412776 | 43190 | 892743 | 482963 | 335065 |
| 80  | 2 | 3 | 3 | 3 | 400 | 5   | 959174  | 14821712 | 340124 | 1272342 | 43824 | 795581 | 426223 | 310891 |
| 80  | 2 | 7 | 5 | 5 | 400 | 5   | 1158400 | 18530782 | 413759 | 1431340 | 49888 | 909628 | 465782 | 334467 |
| 80  | 3 | 3 | 3 | 3 | 400 | 5   | 1032617 | 16304173 | 354932 | 1312489 | 39872 | 828346 | 455842 | 309008 |
| 80  | 3 | 3 | 5 | 5 | 400 | 5   | 1111300 | 17551473 | 397710 | 1366312 | 30965 | 868478 | 471473 | 324257 |
| 80  | 3 | 7 | 3 | 3 | 400 | 5   | 1163533 | 17938116 | 344977 | 1366462 | 43545 | 874568 | 456136 | 319229 |
| 80  | 1 | 5 | 4 | 4 | 500 | 0   | 1053752 | 16392736 | 367888 | 1349184 | 41048 | 841568 | 459800 | 318520 |
| 80  | 1 | 5 | 4 | 4 | 500 | 0   | 1035541 | 16207350 | 363517 | 1321632 | 27422 | 835913 | 453592 | 319240 |
| 80  | 2 | 5 | 4 | 4 | 500 | 0   | 1168192 | 18116431 | 399250 | 1423122 | 41373 | 898651 | 491361 | 337309 |
| 80  | 2 | 5 | 4 | 4 | 500 | 0   | 1143152 | 18112871 | 389640 | 1419081 | 42804 | 901616 | 490495 | 333703 |
| 80  | 3 | 5 | 4 | 4 | 500 | 0   | 1092473 | 17335006 | 374012 | 1345916 | 40497 | 858445 | 456345 | 320401 |
| 80  | 3 | 5 | 4 | 4 | 500 | 0   | 1116867 | 17500024 | 372169 | 1364000 | 44209 | 866892 | 454145 | 320900 |
| 100 | 2 | 5 | 4 | 4 | 100 | 0   | 1038297 | 15412911 | 410812 | 1230772 | 0     | 799723 | 174970 | 282812 |
| 100 | 2 | 5 | 4 | 4 | 300 | 7.5 | 1107003 | 16984704 | 345010 | 1316704 | 23322 | 829329 | 280359 | 317834 |
| 100 | 3 | 5 | 4 | 4 | 300 | 7.5 | 1039442 | 16336186 | 318379 | 1274857 | 42219 | 814724 | 201449 | 298007 |
| 100 | 1 | 5 | 4 | 4 | 100 | 0   | 1066280 | 15762000 | 439080 | 1243280 | 0     | 825120 | 285080 | 336240 |

|     |   |   |   |   |     |     |         |          |        |         |       |         |        |        |
|-----|---|---|---|---|-----|-----|---------|----------|--------|---------|-------|---------|--------|--------|
| 100 | 1 | 5 | 4 | 4 | 300 | 7.5 | 1627342 | 25729395 | 567763 | 2003342 | 66526 | 1265684 | 520526 | 479447 |
| 100 | 1 | 1 | 4 | 4 | 300 | 0   | 455329  | 6296966  | 212443 | 814832  | 39195 | 474832  | 184215 | 225624 |
| 100 | 1 | 9 | 4 | 4 | 300 | 0   | 1178480 | 18135000 | 424213 | 1401813 | 47147 | 933080  | 266653 | 349400 |
| 100 | 2 | 5 | 4 | 4 | 300 | 0   | 1087398 | 16982127 | 401057 | 1339625 | 32428 | 838756  | 253043 | 308134 |
| 100 | 2 | 5 | 4 | 4 | 300 | 0   | 1072993 | 16699020 | 399101 | 1292282 | 33154 | 830322  | 241356 | 310805 |
| 100 | 2 | 5 | 4 | 4 | 300 | 0   | 1082938 | 17080393 | 423502 | 1319895 | 21639 | 850151  | 255974 | 329154 |
| 100 | 1 | 3 | 3 | 3 | 200 | 2.5 | 1036961 | 16402420 | 376493 | 1287410 | 47854 | 827034  | 364946 | 306878 |
| 100 | 1 | 5 | 4 | 4 | 300 | 0   | 1065760 | 16984173 | 388733 | 1324933 | 42773 | 849600  | 313307 | 323720 |
| 100 | 2 | 3 | 5 | 5 | 200 | 2.5 | 1117635 | 17481133 | 348793 | 1326010 | 42118 | 890468  | 297512 | 344507 |
| 100 | 2 | 7 | 3 | 3 | 200 | 2.5 | 1042305 | 16274940 | 330645 | 1278870 | 26115 | 808995  | 180075 | 307590 |
| 100 | 3 | 3 | 3 | 3 | 200 | 2.5 | 1046000 | 16239239 | 383612 | 1247478 | 35597 | 809299  | 245015 | 304672 |
| 100 | 3 | 7 | 5 | 5 | 200 | 2.5 | 1015249 | 15664229 | 320075 | 1210323 | 46020 | 803781  | 108159 | 299328 |
| 100 | 1 | 5 | 4 | 4 | 300 | 0   | 1067787 | 16746698 | 325143 | 1298551 | 28106 | 825701  | 307415 | 314591 |
| 100 | 1 | 7 | 3 | 3 | 200 | 5   | 1109627 | 17365478 | 409985 | 1347090 | 33552 | 862701  | 261149 | 320015 |
| 100 | 2 | 3 | 3 | 3 | 200 | 5   | 1038179 | 16376284 | 319910 | 1280045 | 26881 | 814045  | 313134 | 300045 |
| 100 | 2 | 7 | 5 | 5 | 200 | 5   | 1065303 | 16380303 | 403485 | 1311566 | 0     | 821641  | 193283 | 309621 |
| 100 | 3 | 3 | 5 | 5 | 200 | 5   | 1005347 | 15539802 | 302822 | 1171287 | 43020 | 769035  | 204827 | 283738 |
| 100 | 3 | 7 | 3 | 3 | 200 | 5   | 1047754 | 16095528 | 387769 | 1273492 | 32367 | 807829  | 130281 | 307477 |
| 100 | 2 | 5 | 4 | 4 | 300 | 0   | 1107556 | 17424781 | 404687 | 1367663 | 51434 | 865535  | 240862 | 335582 |
| 100 | 2 | 1 | 4 | 4 | 300 | 0   | 618066  | 8820961  | 221618 | 981474  | 20342 | 578132  | 252526 | 258500 |
| 100 | 2 | 9 | 4 | 4 | 300 | 0   | 1118752 | 17447718 | 353128 | 1371409 | 34993 | 867154  | 163450 | 343812 |
| 100 | 3 | 5 | 4 | 4 | 300 | 0   | 1067974 | 16769592 | 387658 | 1295579 | 47934 | 818579  | 185829 | 308632 |
| 100 | 3 | 5 | 4 | 4 | 300 | 0   | 1104693 | 17049120 | 408347 | 1300080 | 32947 | 829693  | 198827 | 304987 |
| 100 | 3 | 5 | 4 | 4 | 300 | 0   | 1044066 | 16478250 | 318421 | 1279211 | 26961 | 811105  | 188921 | 301684 |
| 100 | 3 | 5 | 4 | 4 | 300 | 0   | 1156571 | 17925940 | 346777 | 1375628 | 49834 | 872532  | 204545 | 316904 |
| 100 | 3 | 1 | 4 | 4 | 300 | 0   | 661360  | 9915300  | 277030 | 1037993 | 0     | 624053  | 267512 | 274284 |
| 100 | 3 | 9 | 4 | 4 | 300 | 0   | 1082301 | 16762549 | 327569 | 1283595 | 33830 | 814523  | 124444 | 315386 |
| 100 | 1 | 5 | 2 | 2 | 300 | 0   | 1056214 | 16536314 | 319438 | 1279826 | 44555 | 816381  | 372107 | 293732 |
| 100 | 1 | 5 | 6 | 6 | 300 | 0   | 1072863 | 16534980 | 335667 | 1319137 | 49196 | 832059  | 298569 | 315392 |

|     |   |   |   |   |     |     |         |          |        |         |       |         |        |        |
|-----|---|---|---|---|-----|-----|---------|----------|--------|---------|-------|---------|--------|--------|
| 100 | 1 | 5 | 4 | 4 | 300 | 0   | 1112803 | 17437445 | 402234 | 1326689 | 42435 | 863853  | 322569 | 321632 |
| 100 | 1 | 5 | 4 | 4 | 300 | 0   | 1114381 | 17258033 | 406421 | 1331893 | 36027 | 851679  | 336495 | 324936 |
| 100 | 2 | 5 | 2 | 2 | 300 | 0   | 1041674 | 16361518 | 323205 | 1280840 | 11752 | 813433  | 315583 | 297107 |
| 100 | 2 | 5 | 6 | 6 | 300 | 0   | 1051010 | 16275525 | 324950 | 1253960 | 55366 | 810376  | 199584 | 288079 |
| 100 | 1 | 7 | 5 | 5 | 200 | 2.5 | 1127550 | 17161300 | 415900 | 1316600 | 0     | 878625  | 249075 | 317250 |
| 100 | 1 | 3 | 5 | 5 | 200 | 5   | 1108775 | 17086525 | 421175 | 1312800 | 0     | 860525  | 353325 | 333850 |
| 100 | 3 | 5 | 2 | 2 | 300 | 0   | 1311572 | 20290562 | 400127 | 1588328 | 50134 | 1006087 | 354749 | 370428 |
| 100 | 3 | 5 | 6 | 6 | 300 | 0   | 1066391 | 16519252 | 319947 | 1272636 | 32980 | 820391  | 210497 | 308960 |
| 100 | 1 | 3 | 5 | 5 | 400 | 2.5 | 1128582 | 17498669 | 390510 | 1347687 | 35510 | 863781  | 410211 | 334938 |
| 100 | 1 | 7 | 3 | 3 | 400 | 2.5 | 1185030 | 18192252 | 359089 | 1390956 | 59726 | 889756  | 341637 | 329074 |
| 100 | 2 | 3 | 3 | 3 | 400 | 2.5 | 1077594 | 16901150 | 326789 | 1318549 | 45218 | 831722  | 377564 | 311301 |
| 100 | 2 | 7 | 5 | 5 | 400 | 2.5 | 1146566 | 17783308 | 409424 | 1400564 | 41203 | 875514  | 203396 | 333271 |
| 100 | 3 | 3 | 5 | 5 | 400 | 2.5 | 1063371 | 16756978 | 386940 | 1299764 | 28570 | 821766  | 272687 | 313619 |
| 100 | 3 | 7 | 3 | 3 | 400 | 2.5 | 1088308 | 17020835 | 329970 | 1317436 | 54594 | 836489  | 198075 | 306699 |
| 100 | 1 | 3 | 3 | 3 | 400 | 5   | 1081455 | 16811777 | 372668 | 1326995 | 49062 | 841804  | 431064 | 323176 |
| 100 | 1 | 7 | 5 | 5 | 400 | 5   | 1151040 | 18164198 | 413734 | 1405100 | 41629 | 901654  | 290990 | 332707 |
| 100 | 2 | 3 | 5 | 5 | 400 | 5   | 1124289 | 17808130 | 336035 | 1339389 | 29314 | 882307  | 343940 | 328080 |
| 100 | 2 | 7 | 3 | 3 | 400 | 5   | 1128899 | 17783027 | 347592 | 1381678 | 45215 | 873386  | 268173 | 325478 |
| 100 | 3 | 3 | 3 | 3 | 400 | 5   | 1163263 | 18008844 | 354774 | 1380983 | 10169 | 886868  | 390037 | 321320 |
| 100 | 3 | 7 | 5 | 5 | 400 | 5   | 917419  | 14360038 | 339085 | 1114850 | 23634 | 720702  | 126679 | 266617 |
| 100 | 2 | 5 | 4 | 4 | 500 | 0   | 1073865 | 17040526 | 323195 | 1318733 | 41020 | 843378  | 299036 | 312303 |
| 100 | 3 | 5 | 4 | 4 | 500 | 0   | 1102311 | 17208829 | 334940 | 1318629 | 44327 | 844343  | 256327 | 309530 |

Table 1. continuation

| TP | TM | CO | VT | VA | M   | H   | C20:5 n3 | C22:5  | C22:6 n3 |
|----|----|----|----|----|-----|-----|----------|--------|----------|
| 60 | 1  | 5  | 4  | 4  | 100 | 0   | 297360   | 283440 | 65440    |
| 60 | 3  | 5  | 4  | 4  | 100 | 0   | 316634   | 305426 | 81386    |
| 60 | 1  | 3  | 3  | 3  | 200 | 2.5 | 249134   | 229493 | 55179    |

|    |   |   |   |   |     |     |        |        |       |
|----|---|---|---|---|-----|-----|--------|--------|-------|
| 60 | 1 | 7 | 5 | 5 | 200 | 2.5 | 332059 | 295980 | 77500 |
| 60 | 2 | 3 | 5 | 5 | 200 | 2.5 | 303571 | 287660 | 77167 |
| 60 | 3 | 3 | 3 | 3 | 200 | 2.5 | 309278 | 283229 | 76610 |
| 60 | 3 | 7 | 5 | 5 | 200 | 2.5 | 351175 | 342625 | 96725 |
| 60 | 1 | 3 | 5 | 5 | 200 | 5   | 275927 | 302171 | 55244 |
| 60 | 1 | 7 | 3 | 3 | 200 | 5   | 314034 | 282746 | 73288 |
| 60 | 2 | 7 | 5 | 5 | 200 | 5   | 322587 | 312463 | 79851 |
| 60 | 3 | 3 | 5 | 5 | 200 | 5   | 339412 | 312500 | 87255 |
| 60 | 3 | 7 | 3 | 3 | 200 | 5   | 329151 | 307859 | 76171 |
| 60 | 1 | 5 | 4 | 4 | 300 | 7.5 | 286702 | 254181 | 64107 |
| 60 | 2 | 5 | 4 | 4 | 300 | 7.5 | 316950 | 292884 | 75168 |
| 60 | 3 | 5 | 4 | 4 | 300 | 7.5 | 329013 | 308171 | 84368 |
| 60 | 1 | 5 | 4 | 4 | 300 | 0   | 302140 | 276465 | 69196 |
| 60 | 1 | 5 | 4 | 4 | 300 | 0   | 306120 | 261707 | 67160 |
| 60 | 1 | 5 | 4 | 4 | 300 | 0   | 301697 | 271711 | 67184 |
| 60 | 1 | 5 | 4 | 4 | 300 | 0   | 302181 | 266140 | 67211 |
| 60 | 1 | 1 | 4 | 4 | 300 | 0   | 234838 | 206337 | 50601 |
| 60 | 1 | 9 | 4 | 4 | 300 | 0   | 334376 | 291101 | 77557 |
| 60 | 1 | 5 | 2 | 2 | 300 | 0   | 248564 | 216886 | 52832 |
| 60 | 1 | 5 | 6 | 6 | 300 | 0   | 298218 | 283426 | 71089 |
| 60 | 2 | 5 | 4 | 4 | 300 | 0   | 325181 | 296000 | 83262 |
| 60 | 2 | 5 | 4 | 4 | 300 | 0   | 331723 | 315815 | 95142 |
| 60 | 2 | 5 | 4 | 4 | 300 | 0   | 324997 | 296262 | 78269 |
| 60 | 2 | 1 | 4 | 4 | 300 | 0   | 301595 | 267869 | 78915 |
| 60 | 2 | 9 | 4 | 4 | 300 | 0   | 334046 | 298177 | 79882 |
| 60 | 2 | 5 | 6 | 6 | 300 | 0   | 334717 | 340046 | 83862 |
| 60 | 3 | 5 | 4 | 4 | 300 | 0   | 329967 | 312302 | 87436 |
| 60 | 3 | 5 | 4 | 4 | 300 | 0   | 329413 | 304747 | 82267 |
| 60 | 3 | 5 | 4 | 4 | 300 | 0   | 331597 | 311235 | 76000 |

|    |   |   |   |   |     |     |        |        |        |
|----|---|---|---|---|-----|-----|--------|--------|--------|
| 60 | 3 | 5 | 4 | 4 | 300 | 0   | 340859 | 317584 | 87732  |
| 60 | 3 | 1 | 4 | 4 | 300 | 0   | 312185 | 281179 | 74159  |
| 60 | 3 | 9 | 4 | 4 | 300 | 0   | 356067 | 325248 | 86134  |
| 60 | 3 | 5 | 2 | 2 | 300 | 0   | 324342 | 295779 | 84403  |
| 60 | 3 | 5 | 6 | 6 | 300 | 0   | 356349 | 337678 | 98329  |
| 60 | 1 | 3 | 5 | 5 | 400 | 2.5 | 262796 | 226650 | 57947  |
| 60 | 1 | 7 | 3 | 3 | 400 | 2.5 | 299443 | 257673 | 69386  |
| 60 | 2 | 3 | 3 | 3 | 400 | 2.5 | 259696 | 232385 | 65030  |
| 60 | 3 | 3 | 5 | 5 | 400 | 2.5 | 327120 | 302057 | 81658  |
| 60 | 3 | 7 | 3 | 3 | 400 | 2.5 | 337707 | 307526 | 81195  |
| 60 | 1 | 3 | 3 | 3 | 400 | 5   | 192364 | 165280 | 39341  |
| 60 | 1 | 7 | 5 | 5 | 400 | 5   | 333995 | 295063 | 77500  |
| 60 | 2 | 3 | 5 | 5 | 400 | 5   | 295076 | 270593 | 72462  |
| 60 | 2 | 7 | 3 | 3 | 400 | 5   | 323978 | 287192 | 84651  |
| 60 | 3 | 3 | 3 | 3 | 400 | 5   | 282296 | 245681 | 63081  |
| 60 | 3 | 7 | 5 | 5 | 400 | 5   | 344611 | 323744 | 82173  |
| 60 | 1 | 5 | 4 | 4 | 500 | 0   | 290525 | 260064 | 68473  |
| 60 | 2 | 5 | 4 | 4 | 500 | 0   | 334538 | 296924 | 77936  |
| 60 | 3 | 5 | 4 | 4 | 500 | 0   | 398004 | 360216 | 97924  |
| 70 | 1 | 5 | 4 | 4 | 100 | 0   | 313243 | 303262 | 77748  |
| 70 | 1 | 3 | 5 | 5 | 200 | 2.5 | 316050 | 295750 | 76900  |
| 70 | 1 | 7 | 5 | 5 | 200 | 5   | 333914 | 334798 | 105556 |
| 70 | 2 | 5 | 2 | 2 | 300 | 0   | 335663 | 300706 | 78990  |
| 70 | 1 | 5 | 4 | 4 | 300 | 7.5 | 318054 | 284255 | 73436  |
| 70 | 1 | 7 | 3 | 3 | 200 | 2.5 | 327844 | 298734 | 81784  |
| 70 | 2 | 3 | 3 | 3 | 200 | 2.5 | 333088 | 300235 | 78368  |
| 70 | 2 | 7 | 5 | 5 | 200 | 2.5 | 338675 | 324625 | 87775  |
| 70 | 3 | 7 | 3 | 3 | 200 | 2.5 | 323985 | 301507 | 81776  |
| 70 | 1 | 3 | 3 | 3 | 200 | 5   | 293201 | 261558 | 66452  |

|    |   |   |   |   |     |     |        |        |        |
|----|---|---|---|---|-----|-----|--------|--------|--------|
| 70 | 1 | 5 | 4 | 4 | 300 | 0   | 325043 | 295719 | 78957  |
| 70 | 2 | 3 | 5 | 5 | 200 | 5   | 333259 | 319602 | 82289  |
| 70 | 2 | 7 | 3 | 3 | 200 | 5   | 332333 | 326621 | 101212 |
| 70 | 3 | 3 | 3 | 3 | 200 | 5   | 322262 | 293525 | 81757  |
| 70 | 3 | 5 | 2 | 2 | 300 | 0   | 325262 | 295497 | 79685  |
| 70 | 3 | 3 | 5 | 5 | 200 | 2.5 | 322424 | 302778 | 82424  |
| 70 | 3 | 7 | 5 | 5 | 200 | 5   | 331675 | 319125 | 88950  |
| 70 | 1 | 5 | 4 | 4 | 300 | 0   | 327733 | 296440 | 80107  |
| 70 | 2 | 5 | 4 | 4 | 100 | 0   | 313412 | 300667 | 79686  |
| 70 | 3 | 5 | 4 | 4 | 100 | 0   | 309423 | 300462 | 82731  |
| 70 | 1 | 5 | 2 | 2 | 300 | 0   | 297300 | 258858 | 67551  |
| 70 | 1 | 5 | 6 | 6 | 300 | 0   | 329230 | 306257 | 81671  |
| 70 | 1 | 5 | 4 | 4 | 300 | 0   | 329508 | 299292 | 79108  |
| 70 | 1 | 5 | 4 | 4 | 300 | 0   | 337003 | 304548 | 79786  |
| 70 | 1 | 7 | 5 | 5 | 400 | 2.5 | 350388 | 320900 | 84088  |
| 70 | 1 | 3 | 5 | 5 | 400 | 5   | 303462 | 267333 | 69764  |
| 70 | 1 | 1 | 4 | 4 | 300 | 0   | 87123  | 74857  | 17329  |
| 70 | 1 | 9 | 4 | 4 | 300 | 0   | 358640 | 323187 | 86947  |
| 70 | 2 | 5 | 4 | 4 | 300 | 7.5 | 333561 | 307148 | 80826  |
| 70 | 3 | 5 | 4 | 4 | 300 | 7.5 | 337135 | 311485 | 85215  |
| 70 | 2 | 5 | 4 | 4 | 300 | 0   | 328133 | 304279 | 81342  |
| 70 | 2 | 5 | 4 | 4 | 300 | 0   | 339333 | 316440 | 84387  |
| 70 | 2 | 5 | 4 | 4 | 300 | 0   | 331642 | 307219 | 82834  |
| 70 | 2 | 5 | 4 | 4 | 300 | 0   | 338596 | 315086 | 85364  |
| 70 | 2 | 1 | 4 | 4 | 300 | 0   | 121267 | 107393 | 27366  |
| 70 | 2 | 9 | 4 | 4 | 300 | 0   | 348503 | 323338 | 85563  |
| 70 | 3 | 5 | 4 | 4 | 300 | 0   | 328954 | 305960 | 82517  |
| 70 | 3 | 5 | 4 | 4 | 300 | 0   | 336997 | 314125 | 82741  |
| 70 | 1 | 3 | 3 | 3 | 400 | 2.5 | 256017 | 218213 | 56376  |

|    |   |   |   |   |     |     |        |        |       |
|----|---|---|---|---|-----|-----|--------|--------|-------|
| 70 | 1 | 5 | 4 | 4 | 500 | 0   | 313675 | 278084 | 74140 |
| 70 | 2 | 3 | 5 | 5 | 400 | 2.5 | 335239 | 305892 | 81985 |
| 70 | 2 | 7 | 3 | 3 | 400 | 2.5 | 336404 | 305656 | 80566 |
| 70 | 3 | 3 | 3 | 3 | 400 | 2.5 | 314157 | 280119 | 75687 |
| 70 | 3 | 7 | 5 | 5 | 400 | 2.5 | 348102 | 325794 | 89218 |
| 70 | 1 | 7 | 3 | 3 | 400 | 5   | 330389 | 290940 | 77110 |
| 70 | 2 | 3 | 3 | 3 | 400 | 5   | 297599 | 261142 | 68424 |
| 70 | 2 | 7 | 5 | 5 | 400 | 5   | 350560 | 327164 | 86343 |
| 70 | 3 | 3 | 5 | 5 | 400 | 5   | 330075 | 302138 | 82163 |
| 70 | 3 | 7 | 3 | 3 | 400 | 5   | 329746 | 305828 | 81918 |
| 70 | 3 | 5 | 4 | 4 | 300 | 0   | 330565 | 307362 | 82950 |
| 70 | 3 | 5 | 4 | 4 | 300 | 0   | 336252 | 314265 | 84000 |
| 70 | 3 | 9 | 4 | 4 | 300 | 0   | 386387 | 360600 | 96507 |
| 70 | 2 | 5 | 4 | 4 | 500 | 0   | 346792 | 314720 | 83664 |
| 70 | 3 | 1 | 4 | 4 | 300 | 0   | 162617 | 143409 | 34591 |
| 70 | 3 | 5 | 4 | 4 | 500 | 0   | 341355 | 311519 | 83311 |
| 70 | 2 | 5 | 6 | 6 | 300 | 0   | 333954 | 311508 | 86518 |
| 70 | 3 | 5 | 6 | 6 | 300 | 0   | 334407 | 315757 | 82761 |
| 80 | 2 | 5 | 4 | 4 | 100 | 0   | 328160 | 310120 | 80800 |
| 80 | 2 | 5 | 4 | 4 | 100 | 0   | 330880 | 294800 | 65880 |
| 80 | 3 | 5 | 4 | 4 | 100 | 0   | 365126 | 348311 | 94796 |
| 80 | 3 | 5 | 4 | 4 | 100 | 0   | 338640 | 323560 | 91160 |
| 80 | 1 | 5 | 4 | 4 | 100 | 0   | 321880 | 306840 | 71640 |
| 80 | 1 | 5 | 4 | 4 | 100 | 0   | 325294 | 308588 | 94196 |
| 80 | 1 | 5 | 4 | 4 | 300 | 7.5 | 336500 | 309053 | 81671 |
| 80 | 2 | 5 | 4 | 4 | 300 | 7.5 | 337120 | 314107 | 85520 |
| 80 | 1 | 3 | 3 | 3 | 200 | 2.5 | 318422 | 284729 | 76628 |
| 80 | 1 | 5 | 4 | 4 | 300 | 7.5 | 328779 | 308132 | 81439 |
| 80 | 1 | 7 | 5 | 5 | 200 | 2.5 | 333441 | 310743 | 81238 |

|    |   |   |   |   |     |     |        |        |        |
|----|---|---|---|---|-----|-----|--------|--------|--------|
| 80 | 1 | 7 | 3 | 3 | 200 | 2.5 | 335350 | 310966 | 81754  |
| 80 | 2 | 3 | 5 | 5 | 200 | 2.5 | 324950 | 310050 | 89200  |
| 80 | 2 | 7 | 3 | 3 | 200 | 2.5 | 329216 | 297980 | 84829  |
| 80 | 2 | 3 | 3 | 3 | 200 | 2.5 | 325224 | 302045 | 86761  |
| 80 | 2 | 7 | 5 | 5 | 200 | 2.5 | 327438 | 308433 | 88358  |
| 80 | 3 | 3 | 3 | 3 | 200 | 2.5 | 334309 | 311912 | 85382  |
| 80 | 3 | 7 | 5 | 5 | 200 | 2.5 | 351750 | 328500 | 95250  |
| 80 | 3 | 3 | 5 | 5 | 200 | 2.5 | 759672 | 337424 | 86843  |
| 80 | 3 | 7 | 3 | 3 | 200 | 2.5 | 348418 | 378224 | 128672 |
| 80 | 1 | 3 | 5 | 5 | 200 | 2.5 | 527118 | 487931 | 131305 |
| 80 | 1 | 7 | 3 | 3 | 200 | 5   | 343782 | 324178 | 88708  |
| 80 | 1 | 3 | 3 | 3 | 200 | 5   | 316123 | 293202 | 78606  |
| 80 | 1 | 3 | 5 | 5 | 200 | 5   | 341906 | 315322 | 88267  |
| 80 | 2 | 3 | 3 | 3 | 200 | 5   | 327910 | 301672 | 80373  |
| 80 | 2 | 7 | 5 | 5 | 200 | 5   | 333744 | 309397 | 81809  |
| 80 | 2 | 3 | 5 | 5 | 200 | 5   | 343193 | 316460 | 86089  |
| 80 | 2 | 7 | 3 | 3 | 200 | 5   | 322000 | 304224 | 84851  |
| 80 | 3 | 3 | 5 | 5 | 200 | 5   | 338557 | 333085 | 83458  |
| 80 | 3 | 7 | 3 | 3 | 200 | 5   | 338819 | 325930 | 85462  |
| 80 | 3 | 3 | 3 | 3 | 200 | 5   | 350745 | 325065 | 83925  |
| 80 | 3 | 7 | 5 | 5 | 200 | 5   | 534976 | 491359 | 136044 |
| 80 | 2 | 5 | 4 | 4 | 300 | 7.5 | 331933 | 308867 | 84613  |
| 80 | 3 | 5 | 4 | 4 | 300 | 7.5 | 310013 | 295409 | 77570  |
| 80 | 3 | 5 | 4 | 4 | 300 | 7.5 | 314605 | 295920 | 79389  |
| 80 | 1 | 7 | 5 | 5 | 200 | 5   | 343168 | 322723 | 80421  |
| 80 | 1 | 5 | 4 | 4 | 300 | 0   | 469659 | 433391 | 114809 |
| 80 | 1 | 5 | 4 | 4 | 300 | 0   | 327513 | 307276 | 84803  |
| 80 | 1 | 5 | 4 | 4 | 300 | 0   | 335881 | 308422 | 87248  |
| 80 | 1 | 1 | 4 | 4 | 300 | 0   | 141767 | 124346 | 31787  |



|    |   |   |   |   |     |   |        |        |       |
|----|---|---|---|---|-----|---|--------|--------|-------|
| 80 | 1 | 9 | 4 | 4 | 300 | 0 | 377458 | 366060 | 99732 |
| 80 | 1 | 5 | 4 | 4 | 300 | 0 | 332187 | 304387 | 82680 |
| 80 | 1 | 5 | 4 | 4 | 300 | 0 | 336974 | 311921 | 82289 |
| 80 | 1 | 5 | 4 | 4 | 300 | 0 | 385803 | 354316 | 97750 |
| 80 | 1 | 5 | 2 | 2 | 300 | 0 | 316807 | 281973 | 76547 |
| 80 | 1 | 5 | 6 | 6 | 300 | 0 | 341980 | 465400 | 78900 |
| 80 | 1 | 5 | 4 | 4 | 300 | 0 | 303680 | 275987 | 70587 |
| 80 | 1 | 5 | 4 | 4 | 300 | 0 | 311493 | 270413 | 73227 |
| 80 | 1 | 1 | 4 | 4 | 300 | 0 | 134392 | 116213 | 27761 |
| 80 | 1 | 9 | 4 | 4 | 300 | 0 | 341987 | 316928 | 87085 |
| 80 | 2 | 5 | 4 | 4 | 300 | 0 | 335894 | 315629 | 84715 |
| 80 | 2 | 5 | 4 | 4 | 300 | 0 | 346087 | 322582 | 86261 |
| 80 | 2 | 5 | 4 | 4 | 300 | 0 | 328173 | 308307 | 83560 |
| 80 | 1 | 5 | 2 | 2 | 300 | 0 | 312449 | 280376 | 76726 |
| 80 | 1 | 5 | 6 | 6 | 300 | 0 | 343043 | 311213 | 79889 |
| 80 | 2 | 5 | 4 | 4 | 300 | 0 | 345829 | 318316 | 85487 |
| 80 | 2 | 1 | 4 | 4 | 300 | 0 | 200027 | 173555 | 45701 |
| 80 | 2 | 9 | 4 | 4 | 300 | 0 | 326904 | 308898 | 81479 |
| 80 | 2 | 5 | 4 | 4 | 300 | 0 | 317608 | 290745 | 81176 |
| 80 | 2 | 5 | 4 | 4 | 300 | 0 | 320702 | 298901 | 81947 |
| 80 | 2 | 5 | 4 | 4 | 300 | 0 | 318533 | 303000 | 79920 |
| 80 | 2 | 5 | 2 | 2 | 300 | 0 | 316013 | 287237 | 76977 |
| 80 | 2 | 5 | 6 | 6 | 300 | 0 | 318301 | 306161 | 79866 |
| 80 | 2 | 5 | 4 | 4 | 300 | 0 | 318040 | 304403 | 79007 |
| 80 | 2 | 1 | 4 | 4 | 300 | 0 | 196093 | 168347 | 45027 |
| 80 | 2 | 9 | 4 | 4 | 300 | 0 | 330413 | 308105 | 82780 |
| 80 | 3 | 5 | 4 | 4 | 300 | 0 | 315047 | 292805 | 76537 |
| 80 | 3 | 5 | 4 | 4 | 300 | 0 | 308105 | 292671 | 83987 |
| 80 | 3 | 5 | 4 | 4 | 300 | 0 | 311735 | 293020 | 81033 |

|    |   |   |   |   |     |     |        |        |       |
|----|---|---|---|---|-----|-----|--------|--------|-------|
| 80 | 2 | 5 | 2 | 2 | 300 | 0   | 312121 | 285919 | 77394 |
| 80 | 2 | 5 | 6 | 6 | 300 | 0   | 370852 | 360081 | 91248 |
| 80 | 3 | 5 | 4 | 4 | 300 | 0   | 312360 | 296147 | 79240 |
| 80 | 3 | 1 | 4 | 4 | 300 | 0   | 229271 | 201298 | 50274 |
| 80 | 3 | 9 | 4 | 4 | 300 | 0   | 325812 | 298926 | 79409 |
| 80 | 3 | 5 | 4 | 4 | 300 | 0   | 309102 | 297469 | 81325 |
| 80 | 3 | 5 | 4 | 4 | 300 | 0   | 306964 | 295252 | 79725 |
| 80 | 3 | 5 | 4 | 4 | 300 | 0   | 314640 | 287960 | 81175 |
| 80 | 3 | 5 | 2 | 2 | 300 | 0   | 308816 | 279204 | 73171 |
| 80 | 3 | 5 | 6 | 6 | 300 | 0   | 306886 | 299376 | 76691 |
| 80 | 3 | 5 | 4 | 4 | 300 | 0   | 307510 | 291841 | 79126 |
| 80 | 3 | 1 | 4 | 4 | 300 | 0   | 229530 | 204148 | 51181 |
| 80 | 3 | 9 | 4 | 4 | 300 | 0   | 316237 | 295961 | 80447 |
| 80 | 1 | 5 | 4 | 4 | 300 | 0   | 332752 | 303678 | 78362 |
| 80 | 2 | 3 | 3 | 3 | 400 | 2.5 | 307193 | 279075 | 78023 |
| 80 | 3 | 5 | 2 | 2 | 300 | 0   | 303003 | 277284 | 76301 |
| 80 | 3 | 3 | 5 | 5 | 400 | 2.5 | 317681 | 303541 | 80449 |
| 80 | 3 | 5 | 6 | 6 | 300 | 0   | 308563 | 290344 | 76887 |
| 80 | 1 | 3 | 5 | 5 | 400 | 2.5 | 307127 | 283595 | 80460 |
| 80 | 1 | 3 | 5 | 5 | 400 | 2.5 | 306505 | 280522 | 76070 |
| 80 | 1 | 3 | 5 | 5 | 400 | 2.5 | 307152 | 301567 | 71580 |
| 80 | 1 | 7 | 3 | 3 | 400 | 2.5 | 327950 | 295534 | 81180 |
| 80 | 1 | 3 | 3 | 3 | 400 | 2.5 | 285000 | 248836 | 66209 |
| 80 | 1 | 7 | 5 | 5 | 400 | 2.5 | 348000 | 315413 | 89125 |
| 80 | 2 | 7 | 5 | 5 | 400 | 2.5 | 319601 | 298716 | 83728 |
| 80 | 2 | 3 | 5 | 5 | 400 | 2.5 | 317301 | 293818 | 77998 |
| 80 | 2 | 7 | 3 | 3 | 400 | 2.5 | 345550 | 316968 | 81913 |
| 80 | 2 | 3 | 5 | 5 | 400 | 5   | 332965 | 301663 | 81973 |
| 80 | 3 | 7 | 5 | 5 | 400 | 2.5 | 314527 | 301729 | 80510 |

|     |   |   |   |   |     |     |        |        |        |
|-----|---|---|---|---|-----|-----|--------|--------|--------|
| 80  | 3 | 7 | 3 | 3 | 400 | 2.5 | 323932 | 296729 | 81874  |
| 80  | 3 | 3 | 3 | 3 | 400 | 2.5 | 317356 | 284207 | 78615  |
| 80  | 3 | 7 | 5 | 5 | 400 | 5   | 328706 | 301095 | 85933  |
| 80  | 1 | 3 | 3 | 3 | 400 | 5   | 284455 | 257836 | 70888  |
| 80  | 1 | 7 | 5 | 5 | 400 | 5   | 333432 | 311296 | 82321  |
| 80  | 1 | 3 | 5 | 5 | 400 | 5   | 314775 | 281138 | 80313  |
| 80  | 1 | 7 | 3 | 3 | 400 | 5   | 320852 | 290681 | 76807  |
| 80  | 2 | 7 | 3 | 3 | 400 | 5   | 338244 | 306067 | 81516  |
| 80  | 2 | 3 | 3 | 3 | 400 | 5   | 316251 | 280690 | 75491  |
| 80  | 2 | 7 | 5 | 5 | 400 | 5   | 336600 | 308263 | 80422  |
| 80  | 3 | 3 | 3 | 3 | 400 | 5   | 316083 | 283586 | 75632  |
| 80  | 3 | 3 | 5 | 5 | 400 | 5   | 319282 | 296597 | 84530  |
| 80  | 3 | 7 | 3 | 3 | 400 | 5   | 315083 | 293095 | 78445  |
| 80  | 1 | 5 | 4 | 4 | 500 | 0   | 323888 | 296592 | 81496  |
| 80  | 1 | 5 | 4 | 4 | 500 | 0   | 318329 | 285046 | 77228  |
| 80  | 2 | 5 | 4 | 4 | 500 | 0   | 331457 | 305573 | 82643  |
| 80  | 2 | 5 | 4 | 4 | 500 | 0   | 335430 | 304879 | 81933  |
| 80  | 3 | 5 | 4 | 4 | 500 | 0   | 322373 | 291808 | 78068  |
| 80  | 3 | 5 | 4 | 4 | 500 | 0   | 317687 | 292394 | 78892  |
| 100 | 2 | 5 | 4 | 4 | 100 | 0   | 305030 | 285030 | 84000  |
| 100 | 2 | 5 | 4 | 4 | 300 | 7.5 | 352332 | 313342 | 85116  |
| 100 | 3 | 5 | 4 | 4 | 300 | 7.5 | 305967 | 283309 | 75508  |
| 100 | 1 | 5 | 4 | 4 | 100 | 0   | 330200 | 318720 | 90840  |
| 100 | 1 | 5 | 4 | 4 | 300 | 7.5 | 463000 | 425921 | 129513 |
| 100 | 1 | 1 | 4 | 4 | 300 | 0   | 245570 | 209141 | 50711  |
| 100 | 1 | 9 | 4 | 4 | 300 | 0   | 326920 | 308853 | 92027  |
| 100 | 2 | 5 | 4 | 4 | 300 | 0   | 312763 | 287064 | 83599  |
| 100 | 2 | 5 | 4 | 4 | 300 | 0   | 307758 | 284430 | 80658  |
| 100 | 2 | 5 | 4 | 4 | 300 | 0   | 307043 | 282348 | 88393  |

|     |   |   |   |   |     |     |        |        |        |
|-----|---|---|---|---|-----|-----|--------|--------|--------|
| 100 | 1 | 3 | 3 | 3 | 200 | 2.5 | 303966 | 284473 | 76229  |
| 100 | 1 | 5 | 4 | 4 | 300 | 0   | 316547 | 304560 | 82467  |
| 100 | 2 | 3 | 5 | 5 | 200 | 2.5 | 316305 | 319286 | 100616 |
| 100 | 2 | 7 | 3 | 3 | 200 | 2.5 | 329085 | 301275 | 92310  |
| 100 | 3 | 3 | 3 | 3 | 200 | 2.5 | 297448 | 281507 | 76149  |
| 100 | 3 | 7 | 5 | 5 | 200 | 2.5 | 293433 | 275846 | 82587  |
| 100 | 1 | 5 | 4 | 4 | 300 | 0   | 301515 | 289940 | 74924  |
| 100 | 1 | 7 | 3 | 3 | 200 | 5   | 313567 | 286284 | 81134  |
| 100 | 2 | 3 | 3 | 3 | 200 | 5   | 302284 | 288776 | 70537  |
| 100 | 2 | 7 | 5 | 5 | 200 | 5   | 318561 | 298081 | 83838  |
| 100 | 3 | 3 | 5 | 5 | 200 | 5   | 287921 | 267871 | 72946  |
| 100 | 3 | 7 | 3 | 3 | 200 | 5   | 299518 | 278382 | 76538  |
| 100 | 2 | 5 | 4 | 4 | 300 | 0   | 326801 | 306168 | 87044  |
| 100 | 2 | 1 | 4 | 4 | 300 | 0   | 268408 | 251895 | 73658  |
| 100 | 2 | 9 | 4 | 4 | 300 | 0   | 321893 | 282376 | 98537  |
| 100 | 3 | 5 | 4 | 4 | 300 | 0   | 302158 | 281526 | 79776  |
| 100 | 3 | 5 | 4 | 4 | 300 | 0   | 307147 | 288000 | 79307  |
| 100 | 3 | 5 | 4 | 4 | 300 | 0   | 297211 | 278461 | 73289  |
| 100 | 3 | 5 | 4 | 4 | 300 | 0   | 323615 | 293635 | 81807  |
| 100 | 3 | 1 | 4 | 4 | 300 | 0   | 279366 | 254759 | 70667  |
| 100 | 3 | 9 | 4 | 4 | 300 | 0   | 296444 | 274928 | 85190  |
| 100 | 1 | 5 | 2 | 2 | 300 | 0   | 306702 | 275472 | 74742  |
| 100 | 1 | 5 | 6 | 6 | 300 | 0   | 311451 | 288745 | 78000  |
| 100 | 1 | 5 | 4 | 4 | 300 | 0   | 314997 | 290475 | 72201  |
| 100 | 1 | 5 | 4 | 4 | 300 | 0   | 319612 | 291197 | 74368  |
| 100 | 2 | 5 | 2 | 2 | 300 | 0   | 297140 | 272782 | 74156  |
| 100 | 2 | 5 | 6 | 6 | 300 | 0   | 305208 | 274396 | 73723  |
| 100 | 1 | 7 | 5 | 5 | 200 | 2.5 | 316275 | 306175 | 85000  |
| 100 | 1 | 3 | 5 | 5 | 200 | 5   | 326200 | 301650 | 100050 |

|     |   |   |   |   |     |     |        |        |       |
|-----|---|---|---|---|-----|-----|--------|--------|-------|
| 100 | 3 | 5 | 2 | 2 | 300 | 0   | 369231 | 334729 | 91251 |
| 100 | 3 | 5 | 6 | 6 | 300 | 0   | 307132 | 286430 | 78159 |
| 100 | 1 | 3 | 5 | 5 | 400 | 2.5 | 317475 | 292425 | 74241 |
| 100 | 1 | 7 | 3 | 3 | 400 | 2.5 | 323178 | 299770 | 82407 |
| 100 | 2 | 3 | 3 | 3 | 400 | 2.5 | 308368 | 291737 | 76850 |
| 100 | 2 | 7 | 5 | 5 | 400 | 2.5 | 324236 | 302481 | 82945 |
| 100 | 3 | 3 | 5 | 5 | 400 | 2.5 | 308794 | 290435 | 79403 |
| 100 | 3 | 7 | 3 | 3 | 400 | 2.5 | 301459 | 286128 | 77519 |
| 100 | 1 | 3 | 3 | 3 | 400 | 5   | 316790 | 286693 | 82656 |
| 100 | 1 | 7 | 5 | 5 | 400 | 5   | 331115 | 296617 | 81629 |
| 100 | 2 | 3 | 5 | 5 | 400 | 5   | 314214 | 311845 | 86621 |
| 100 | 2 | 7 | 3 | 3 | 400 | 5   | 314428 | 296755 | 83027 |
| 100 | 3 | 3 | 3 | 3 | 400 | 5   | 321543 | 299792 | 78670 |
| 100 | 3 | 7 | 5 | 5 | 400 | 5   | 263095 | 239812 | 67732 |
| 100 | 2 | 5 | 4 | 4 | 500 | 0   | 309275 | 286462 | 78789 |
| 100 | 3 | 5 | 4 | 4 | 500 | 0   | 310127 | 286837 | 78311 |
